# Supplementary material for: Efficacy, Safety, and Tolerability of Treatments for Systemic Sclerosis-Related Interstitial Lung Disease: A Systematic Review and Network Meta-Analysis
Source: J Clin Med. 2020 Aug 7;9(8):2560. doi: 10.3390/jcm9082560 (PMC7465266; doi:10.3390/jcm9082560)
Supplement: Supplementary file 1 [file jcm-09-02560-s001.pdf]

**EFFICACY, SAFETY AND TOLERABILITY OF TREATMENTS  
FOR SYSTEMIC SCLEROSIS-RELATED INTERSTITIAL LUNG DISEASE:  
A NETWORK META-ANALYSIS**

Erre GL, Sebastiani M, Fenu MA, Zinellu A, Floris A,  
Cavagna L, Renzoni E, Manfredi A, Passiu G, Woodman RJ, and Mangoni AA.

**Supplementary appendix**

## INDEX

|                                                                                |           |
|--------------------------------------------------------------------------------|-----------|
| <b>Abbreviations.....</b>                                                      | <b>4</b>  |
| <b>1. RCTs included in the NMA.....</b>                                        | <b>5</b>  |
| 1.1 Matrix of RCTs with outcomes available for the NMA.....                    | 5         |
| 1.2 Summary of characteristics of RCTs included in the NMA.....                | 6         |
| 1.3 Characteristics of RCTs.....                                               | 7         |
| 1.4 Reference list of RCTs included in the NMA.....                            | 24        |
| <b>2. Studies excluded from the NMA.....</b>                                   | <b>25</b> |
| 2.1 List of studies excluded from the NMA and reasons for exclusion.....       | 25        |
| 2.2 Reference list of studies excluded from the NMA.....                       | 27        |
| <b>3. Evaluation of Risk of Bias.....</b>                                      | <b>30</b> |
| 3.1 Summary of Risk of Bias.....                                               | 30        |
| 3.2 Graph of Risk of Bias.....                                                 | 30        |
| 3.3 Overall Risk of Bias of RCTs included in the NMA.....                      | 31        |
| <b>4. Network meta-analysis.....</b>                                           | <b>32</b> |
| 4.1 League table change in “FVC % of predicted”.....                           | 32        |
| 4.2 League table change in “DLCO % of predicted”.....                          | 32        |
| 4.3 League table number of patients with serious adverse events.....           | 32        |
| 4.4 Number of patients discontinuing treatments for adverse events.....        | 33        |
| 4.5 Deaths.....                                                                | 33        |
| <b>5. Netweighth.....</b>                                                      | <b>34</b> |
| 5.1 Change in “FVC % of predicted”.....                                        | 34        |
| 5.2 Change in “DLCO % of predicted”.....                                       | 35        |
| 5.3 Number of patients with serious adverse events.....                        | 36        |
| 5.4 Number of patients discontinuing treatments for adverse events.....        | 37        |
| 5.5 Deaths.....                                                                | 38        |
| <b>6. Evaluation of inconsistency.....</b>                                     | <b>39</b> |
| 6.1 Change in “FVC % of predicted”.....                                        | 39        |
| 6.1.1 Loop-specific heterogeneity estimate.....                                | 39        |
| 6.1.2 Node-splitting approach.....                                             | 39        |
| 6.1.3 Design-by-treatment test.....                                            | 39        |
| 6.2 Change in “DLCO % of predicted”.....                                       | 40        |
| 6.2.1 Loop-specific heterogeneity estimate.....                                | 40        |
| 6.2.2 Node-splitting approach.....                                             | 40        |
| 6.2.3 Design-by-treatment test.....                                            | 40        |
| 6.3 Serious adverse events.....                                                | 41        |
| 6.3.1 Loop-specific heterogeneity estimate.....                                | 41        |
| 6.3.2 Node-splitting approach.....                                             | 41        |
| 6.3.3 Design-by-treatment test.....                                            | 41        |
| <b>7. Quality ratings.....</b>                                                 | <b>42</b> |
| 7.1 GRADE “change in “FVC % of predicted”.....                                 | 42        |
| 7.2 GRADE “change in “DLCO % of predicted”.....                                | 45        |
| 7.3 GRADE “number of patients with serious adverse events”.....                | 47        |
| 7.4 GRADE “number of patients discontinuing treatments for adverse events..... | 48        |

|                                                                                |           |
|--------------------------------------------------------------------------------|-----------|
| 7.5 GRADE “Deaths”.....                                                        | 50        |
| <b>8. SUCRAs and cumulative probability plots.....</b>                         | <b>53</b> |
| 8.1 SUCRA “change in FVC % of predicted”.....                                  | 53        |
| 8.2 SUCRA “change in “DLCO % of predicted”.....                                | 54        |
| 8.3 SUCRA “number of patients with serious adverse events.....                 | 55        |
| 8.4 SUCRA “number of patients discontinuing treatments for adverse events..... | 56        |
| 8.5 SUCRA “Deaths”.....                                                        | 57        |
| <b>9. Sensitivity analysis .....</b>                                           | <b>58</b> |
| 9.1 Effect estimates according to correlation factor.....                      | 58        |
| 9.1.1 FVC % of predicted.....                                                  | 58        |
| 9.1.2 DLCO % of predicted.....                                                 | 58        |
| 9.2 Effect estimates according to length of follow-up.....                     | 58        |
| 9.2.1 FVC % of predicted.....                                                  | 58        |
| 9.2.2 DLCO % of predicted.....                                                 | 58        |
| <b>10. Dataset.....</b>                                                        | <b>59</b> |
| <b>11. Stata syntax.....</b>                                                   | <b>61</b> |
| <b>12. Search strategy.....</b>                                                | <b>64</b> |

## ABBREVIATIONS

|                      |                                                  |
|----------------------|--------------------------------------------------|
| <b>ABA</b>           | Abatacept                                        |
| <b>ACR</b>           | American College of Rheumatology                 |
| <b>AEs</b>           | Adverse events                                   |
| <b>AMBRI</b>         | Ambrisentan                                      |
| <b>Anti-TGFbeta1</b> | Anti-transforming growth factor beta1            |
| <b>AZA</b>           | Azathioprine                                     |
| <b>BELI</b>          | Belimumab                                        |
| <b>CYC</b>           | Cyclophosphamide                                 |
| <b>CYCAZA</b>        | Cyclophosphamide + azathioprine                  |
| <b>CYCPRED</b>       | Cyclophosphamide + high dose prednisone          |
| <b>CRIS</b>          | Combined Response Index for Systemic Sclerosis   |
| <b>DLCO</b>          | Diffusing capacity of lung for carbon monoxide   |
| <b>dcSSc</b>         | Diffuse systemic sclerosis                       |
| <b>ESR</b>           | Erythrocyte sedimentation rate                   |
| <b>FVC</b>           | Forced Vital Capacity                            |
| <b>FXIII</b>         | Factor XIII                                      |
| <b>HAQ-DI</b>        | Health assessment questionnaire disability index |
| <b>HRCT</b>          | High-resolution (chest) computerized tomography  |
| <b>HSCT</b>          | Haemopoietic stem-cell transplantation           |
| <b>ILD</b>           | Interstitial lung disease                        |
| <b>IQR</b>           | Interquartile range                              |
| <b>LoF</b>           | Length of follow-up                              |
| <b>LPA</b>           | Lysophosphatidic Acid 1 receptor-antagonist      |
| <b>MDI</b>           | Mahler Dyspnoea Index                            |
| <b>MMF</b>           | Mycophenolate mofetil                            |
| <b>mRSS</b>          | modified Rodnan skin score                       |
| <b>MTX</b>           | Methotrexate                                     |
| <b>n.a</b>           | not available                                    |
| <b>NAC</b>           | N-acetylcysteine                                 |
| <b>NMA</b>           | Network meta-analysis                            |
| <b>NSIP</b>          | Non Specific Interstitial Pneumonia              |
| <b>NTD</b>           | Nintedanib                                       |
| <b>PAH</b>           | Pulmonary arterial hypertension                  |
| <b>(m)PAP</b>        | (mean)Pulmonary arterial pressure                |
| <b>PBO</b>           | Placebo                                          |
| <b>PFD</b>           | Pirfenidone                                      |
| <b>POMA</b>          | Pomalidomide                                     |
| <b>RAPA</b>          | Rapamycin                                        |
| <b>RIO</b>           | Riociguat                                        |
| <b>RoB</b>           | Risk of bias                                     |
| <b>RP</b>            | Raynaud's phenomenon                             |
| <b>SAE</b>           | Serious adverse event                            |
| <b>SF-36</b>         | Medical Outcome Short Form 36                    |
| <b>SSc</b>           | Systemic sclerosis                               |
| <b>SD</b>            | Standard deviation                               |
| <b>VAS</b>           | Analogue scale for pain                          |

## 1. RCTs INCLUDED IN THE NMA

### 1.1 Matrix of RCTs with outcomes available for the NMA

|                           | <b>Study</b>                       | <b>Change<br/>FVC % of<br/>predicted</b> | <b>Change<br/>DLCO % of<br/>predicted</b> | <b>Number of<br/>patients with<br/>SAEs</b> | <b>Number of patients<br/>discontinuing<br/>treatment for AEs</b> | <b>Deaths</b> |
|---------------------------|------------------------------------|------------------------------------------|-------------------------------------------|---------------------------------------------|-------------------------------------------------------------------|---------------|
| 1                         | <a href="#">SLS-I, 2006</a>        | 145                                      | 145                                       | 145                                         | -                                                                 | 145           |
| 2                         | <a href="#">SLS-II, 2016</a>       | 104                                      | 104                                       | 104                                         | 104                                                               | 104           |
| 3                         | <a href="#">Domiciano DS, 2011</a> | 18                                       | 18                                        | -                                           | -                                                                 | 18            |
| 4                         | <a href="#">Hoyles RK, 2006</a>    | 37                                       | 37                                        | -                                           | 37                                                                | -             |
| 5                         | <a href="#">Naidu GSRSNK, 2020</a> | 34                                       | 34                                        | 34                                          | 34                                                                | -             |
| 6                         | <a href="#">Sircar G, 2018</a>     | 60                                       | -                                         | -                                           | -                                                                 | 60            |
| 7                         | <a href="#">SENSCIS, 2019</a>      | -                                        | 475                                       | 475                                         | 475                                                               | 475           |
| 8                         | <a href="#">Acharya N, 2019</a>    | 34                                       | -                                         | -                                           | 34                                                                | 34            |
| 9                         | <a href="#">Hsu VM, 2018</a>       | 19                                       | -                                         | 19                                          | 19                                                                | 19            |
| <b>Total studies</b>      |                                    | <b>8</b>                                 | <b>5</b>                                  | <b>5</b>                                    | <b>6</b>                                                          | <b>7</b>      |
| <b>Total participants</b> |                                    | <b>451</b>                               | <b>813</b>                                | <b>777</b>                                  | <b>703</b>                                                        | <b>855</b>    |

### 1.2 Summary of characteristics of RCTs included in the NMA

| Study years, country      | Arms        | Follow-up months | Age years    | F %          | Dis. duration years | dcSSc %      | Criteria SSc-ILD    | UIP/NSIP %             | Criteria FVC % | Criteria DLCO % | Baseline FVC % | Baseline DLCO % | Low dose steroids              | High dose steroids | Other Immunos.       | Sponsor |
|---------------------------|-------------|------------------|--------------|--------------|---------------------|--------------|---------------------|------------------------|----------------|-----------------|----------------|-----------------|--------------------------------|--------------------|----------------------|---------|
| SLS-I 2006, USA           | CYC PBO     | 12               | 48<br>47     | 75.6<br>64   | 3.2<br>3.1          | 62.8<br>57.7 | HRCT<br>BAL, PFT    | n.a                    | >45<85         | >30             | 67.6<br>68.6   | 47<br>47.4      | yes                            | no                 | yes                  | no      |
| SLS-II 2016, USA          | CYC MMF     | 3, 6<br>12, 24   | 52.0<br>52.6 | 78.1<br>69.6 | 2.5<br>2.6          | 54.8<br>62.3 | HRCT                | n.a                    | >45<85         | >40             | 66.5<br>66.5   | 54.1<br>54      | n.a                            | n.a                | yes                  | no      |
| Domiciano DS 2011, Brazil | CYC CYCPRED | 12               | 44.6<br>41.2 | 100<br>100   | 5.8<br>6.0          | 31.8<br>39.8 | Lung biopsy         | 0/100                  | n.a            | n.a             | 67.3<br>64.7   | 61.8<br>69.8    | no                             | yes                | no                   | no      |
| Hoyles RK 2006, UK        | CYCAZA PBO  | 12               | n.a          | 77.3<br>75.2 | 2.7<br>5.5          | 31.8<br>39.1 | HCRT<br>Lung biopsy | n.a                    | n.a            | n.a             | 80<br>81       | 52<br>55        | prednisolone<br>20 mg alt. day | no                 | no                   | no      |
| Naidu GSRSNK 2011, India  | MMF PBO     | 6                | 40.5<br>40   | 95<br>95.1   | 4.5<br>3            | 60<br>38     | HRCT                | 41.5/58.5              | >70            | n.a             | 75.6<br>85     | 43<br>53        | prednisolone<br>≤10 mg         | no                 | no                   | no      |
| SENSCIS 2019, multicenter | NTD PBO     | 12               | 54.6<br>53.4 | 76.7<br>73.6 | 3.4<br>3.5          | 53.1<br>53.4 | HRCT                | n.a                    | >40            | >30<89          | 72.4<br>72.7   | 52.9<br>53.2    | prednisone<br>10 mg/day        | no                 | MMF<br>or MTX        | yes     |
| Sircar G 2018, India      | CYC RTX     | 6                | 36.5<br>34.6 | 83<br>83     | 1.9<br>1.7          | 100<br>100   | HRCT<br>and PFTs    | 16.6/80                | >45<85         | n.a             | 59.2<br>61.3   | n.a             | prednisolone<br>10 mg/day      | no                 | no                   | no      |
| Acharya N 2019, India     | PFD PBO     | 6                | 42<br>40     | 100<br>82    | 4<br>3              | 35.2<br>35.2 | HRCT                | 58.8/35.3<br>64.7/29.4 | >50<80         | >30             | 65<br>62.7     | 45<br>50        | prednisone<br>≤10 mg           | no                 | CYC, AZA<br>MMF, MTX | no      |
| Hsu VM 2018, multicenter  | POMA PBO    | 12               | 48.9<br>44.8 | 90.9<br>83.3 | 4.7<br>5.3          | 80<br>75     | HRCT                | n.a                    | >45<75         | >35<80          | 57.7<br>60.9   | n.a             | no                             | no                 | no                   | yes     |

Alt. day, alternate day; BAL, bronchoalveolar lavage; n.a, not available; dcSSc, diffuse cutaneous SSc; F%, female %; PFTs, pulmonary function tests; UIP/NSIP, HRCT pattern type Usual Interstitial Pneumonia or Non-Specific Interstitial Pneumonia;

### 1.3 Characteristics of RCTs

|                                     |                                                                                                                                                                                                                                                                                                                                                                                                                                                  |                |                |
|-------------------------------------|--------------------------------------------------------------------------------------------------------------------------------------------------------------------------------------------------------------------------------------------------------------------------------------------------------------------------------------------------------------------------------------------------------------------------------------------------|----------------|----------------|
| 1. SLS-I, 2006                      |                                                                                                                                                                                                                                                                                                                                                                                                                                                  |                |                |
| Methods                             | Design: multicenter, double-blind, randomized, placebo-controlled parallel trial<br>Duration: 1 year of treatment followed by 1 year of observation<br>Location: 13 investigational centres in USA<br>Years: 2000-2004                                                                                                                                                                                                                           |                |                |
| Participants                        | Population: 158 participants were randomised to cyclophosphamide, CYC (79) and placebo PBO (79).                                                                                                                                                                                                                                                                                                                                                 |                |                |
| Baseline characteristics            | Age, mean $\pm$ SE: 48.2 $\pm$ 1.4 CYC, 47.5 $\pm$ 1.4 PBO<br>% female: 75.6 CYC, 64.6 PBO<br>Disease duration (mean yrs.): 3.2 $\pm$ 0.3 CYC, 3.1 $\pm$ 0.2 PBO<br>Diffuse SSc %: 62.8 CYC, 57.7 PBO<br>Baseline FVC % predicted: 67.6 $\pm$ 1.5 CYC, 68.6 $\pm$ 1.5 PBO<br>Baseline DLCO % predicted: 47.0 $\pm$ 1.6 CYC, 47.4 $\pm$ 1.6 PBO                                                                                                   |                |                |
| Inclusion criteria                  | Limited or diffuse SSc with evidence of active alveolitis on bronchoalveolar lavage fluid or thoracic high-resolution computed tomography; any ground-glass opacity; onset of the first symptom of scleroderma other than Raynaud's phenomenon within the previous 7 years; FVC % between 45 and 85 percent of the predicted value; exertional dyspnoea $\geq$ grade 2 on the Magnitude of Task component of the Mahler Baseline Dyspnoea Index. |                |                |
| Exclusion criteria                  | DLCO <30 % predicted; history of smoking within the preceding six months; other clinically significant pulmonary abnormalities, or clinically significant pulmonary hypertension requiring drug therapy. Patients taking prednisone >10 mg per day. Patients previously treated >4 weeks with oral cyclophosphamide or >2 intravenous doses. Patients on other potentially disease-modifying medications.                                        |                |                |
| Interventions                       | Treatment: oral cyclophosphamide $\leq$ 2 mg/kg daily<br>Comparator: placebo                                                                                                                                                                                                                                                                                                                                                                     |                |                |
| Concomitant medications             | Prednisone at a dose of less than 10 mg per day.                                                                                                                                                                                                                                                                                                                                                                                                 |                |                |
| Primary outcome                     | Change in FVC % predicted at 24 months.                                                                                                                                                                                                                                                                                                                                                                                                          |                |                |
| Secondary outcomes                  | Pre-specified secondary outcomes included values at month 12, adjusted for baseline values, for total lung capacity (expressed as a percentage of the predicted value), DLCO, the diffusing capacity adjusted for alveolar volume (DL:Va), the disability index of the Health Assessment Questionnaire (HAQ), and the Medical Outcomes Study 36-item Short-Form General Health Survey (SF-36).                                                   |                |                |
| Patients available for the analysis | 73 CYC, 72 PBO                                                                                                                                                                                                                                                                                                                                                                                                                                   |                |                |
| Outcomes included in the NMA        | 1: Change in "FVC % of predicted value at 1 year from baseline"<br>2: Change in "DLCO % of predicted value" at 1 year from baseline<br>3: Number of patients with SAEs at the longest available follow-up<br>4: Deaths at the longest available follow-up                                                                                                                                                                                        |                |                |
| Sponsor                             | Investigator-initiated                                                                                                                                                                                                                                                                                                                                                                                                                           |                |                |
| Funding                             | Supported by a grant from the Public Health Service and by grants from the National Heart, Lung, and Blood Institute, by the National Institute of Arthritis and Musculoskeletal and Skin Diseases, and by a grant from the National Center for Research Resources, National Institutes of Health.                                                                                                                                               |                |                |
| Trial registration                  | n.a                                                                                                                                                                                                                                                                                                                                                                                                                                              |                |                |
| Summary statistics (outcome)        | mean $\pm$ SE (1, 2)<br>n (3,4)                                                                                                                                                                                                                                                                                                                                                                                                                  |                |                |
| Imputed variables                   | SD                                                                                                                                                                                                                                                                                                                                                                                                                                               |                |                |
| Formula                             | SD = SE* $\sqrt{n}$                                                                                                                                                                                                                                                                                                                                                                                                                              |                |                |
|                                     | Summary statistics                                                                                                                                                                                                                                                                                                                                                                                                                               | CYC n=73       | PBO n=72       |
| 1. Change FVC % predicted           | mean $\pm$ SD                                                                                                                                                                                                                                                                                                                                                                                                                                    | -1.0 $\pm$ 7.8 | -2.6 $\pm$ 7.6 |
| 2. Change DLCO % predicted          | mean $\pm$ SD                                                                                                                                                                                                                                                                                                                                                                                                                                    | -4.2 $\pm$ 9.9 | -3.5 $\pm$ 8.4 |
|                                     | Summary statistics                                                                                                                                                                                                                                                                                                                                                                                                                               | CYC n=79       | PBO n=76       |
| 3. Number of patients with SAEs     | n                                                                                                                                                                                                                                                                                                                                                                                                                                                | 20             | 16             |
| 4. Deaths                           | n                                                                                                                                                                                                                                                                                                                                                                                                                                                | 6              | 6              |

| Risk of Bias                           | Author's judgment | Support for judgement                                                                                                                                                                                                                                                                                                                                                                                                                                                                                                                                                                                                                                                                                                                                                                                                                                                                                                                                                                                                                                                                                                 |
|----------------------------------------|-------------------|-----------------------------------------------------------------------------------------------------------------------------------------------------------------------------------------------------------------------------------------------------------------------------------------------------------------------------------------------------------------------------------------------------------------------------------------------------------------------------------------------------------------------------------------------------------------------------------------------------------------------------------------------------------------------------------------------------------------------------------------------------------------------------------------------------------------------------------------------------------------------------------------------------------------------------------------------------------------------------------------------------------------------------------------------------------------------------------------------------------------------|
| Random sequence generation             | Low risk          | <i>"Patients who met all the inclusion criteria were randomly assigned with the use of a permuted-block design and a 1:1 allocation (in blocks of four to six patients per center)."</i>                                                                                                                                                                                                                                                                                                                                                                                                                                                                                                                                                                                                                                                                                                                                                                                                                                                                                                                              |
| Allocation concealment                 | Unclear risk      | Details not available                                                                                                                                                                                                                                                                                                                                                                                                                                                                                                                                                                                                                                                                                                                                                                                                                                                                                                                                                                                                                                                                                                 |
| Blinding of participants and personnel | Low risk          | <i>"Cyclophosphamide and placebo were formulated into matching gel caps"</i>                                                                                                                                                                                                                                                                                                                                                                                                                                                                                                                                                                                                                                                                                                                                                                                                                                                                                                                                                                                                                                          |
| Blinding of outcome assessment         | Low risk          | <i>"FVC, the primary endpoint, and the other physiological measures were determined by trained, project-certified hospital-based pulmonary function technologists. Since these technicians were unaware of changes in study medication or the results of other outcomes, it is unlikely that they could have become unintentionally unblinded"</i>                                                                                                                                                                                                                                                                                                                                                                                                                                                                                                                                                                                                                                                                                                                                                                    |
| Incomplete outcome data                | Low risk          | <p><i>"Of a total of 158 patients, 3 assigned to placebo and 1 assigned to cyclophosphamide withdrew before starting study treatment and were not included in the analysis. A total of 20 participants in the cyclophosphamide group and 13 in the placebo group withdrew within 12 months after randomisation, most because of adverse events or serious adverse events. Many participants who withdrew were available for endpoint measurement at 12months; however some 12-month data were extrapolated from 6- or 9-month data. For remaining participants who withdrew prematurely, a generalised estimating- equation regression model was fitted, and data missing at 12 months were imputed. Intention-to-treat analysis was used."</i></p> <p><i>"A high percentage of the randomized participants yielded evaluable data that permitted analysis of the primary endpoint (12-month % predicted FVC): 90.1% CYC and 89% placebo subjects".</i></p> <p>An appropriate imputation method has been employed and the proportion of missing outcome data is 20% or less overall and is balanced between arms.</p> |
| Selective reporting                    | Unclear risk      | Pre-publication study protocol not available. No trial registration.                                                                                                                                                                                                                                                                                                                                                                                                                                                                                                                                                                                                                                                                                                                                                                                                                                                                                                                                                                                                                                                  |
| Other bias                             | Low risk          |                                                                                                                                                                                                                                                                                                                                                                                                                                                                                                                                                                                                                                                                                                                                                                                                                                                                                                                                                                                                                                                                                                                       |
| Overall RoB                            | Low risk          |                                                                                                                                                                                                                                                                                                                                                                                                                                                                                                                                                                                                                                                                                                                                                                                                                                                                                                                                                                                                                                                                                                                       |

|                                     |                                                                                                                                                                                                                                                                                                                                                                                                                                                                                                                                                                                                                                                                                                                                                                                                                                          |                |                |
|-------------------------------------|------------------------------------------------------------------------------------------------------------------------------------------------------------------------------------------------------------------------------------------------------------------------------------------------------------------------------------------------------------------------------------------------------------------------------------------------------------------------------------------------------------------------------------------------------------------------------------------------------------------------------------------------------------------------------------------------------------------------------------------------------------------------------------------------------------------------------------------|----------------|----------------|
| 2. SLS-II, 2016                     |                                                                                                                                                                                                                                                                                                                                                                                                                                                                                                                                                                                                                                                                                                                                                                                                                                          |                |                |
| Methods                             | Design: multicenter, double-blind, randomized, two-arm parallel trial<br>Duration: 24 months.<br>Location: 14 centers in USA.<br>Years: 2009-2013                                                                                                                                                                                                                                                                                                                                                                                                                                                                                                                                                                                                                                                                                        |                |                |
| Participants                        | Population: 142 participants were randomised to cyclophosphamide, CYC (73) and mycophenolate mofetil, MMF (69).                                                                                                                                                                                                                                                                                                                                                                                                                                                                                                                                                                                                                                                                                                                          |                |                |
| Baseline characteristics            | Age, mean $\pm$ SD years: 52.0 $\pm$ 9.8 CYC, 52.6 $\pm$ 9.7 MMF<br>% female: 78.1 CYC, 69.6 MMF<br>Disease duration, mean $\pm$ SD years: 2.5 $\pm$ 1.8 CYC, 2.6 $\pm$ 1.7 MMF<br>Diffuse SSc %: 54.8 CYC, 62.3 MMF<br>Baseline FVC % predicted, mean $\pm$ SD: 66.5 $\pm$ 8.3 CYC, 66.5 $\pm$ 9.1 MMF<br>Baseline DLCO % predicted, mean $\pm$ SD: 54.1 $\pm$ 14.1 CYC, 54.0 $\pm$ 11.1 MMF                                                                                                                                                                                                                                                                                                                                                                                                                                            |                |                |
| Inclusion criteria                  | Defined SSc; Age 18–75 years; FVC <80% but $\geq$ 45% of the predicted value; exertional dyspnoea $\geq$ Grade 2 on the Magnitude of Task component of the Mahler Baseline Dyspnoea Index; any ground glass opacity on whether associated with reticulations (fibrosis) or not; onset of their first non-Raynaud's symptom of SSc within the previous 7 years.                                                                                                                                                                                                                                                                                                                                                                                                                                                                           |                |                |
| Exclusion criteria                  | FVC<45% predicted, FEV1/FVC ratio <65%, pulmonary hypertension DLCO <40% predicted; clinically significant abnormalities on HRCT not attributable to SSc; smoking within the past 6 months; evidence of significant airflow obstruction; persistent unexplained haematuria, leukopenia, thrombocytopenia and clinically significant anaemia. increased liver function test and serum creatinine; uncontrolled congestive heart failure; pregnancy and/or breast feeding; prior use of oral CYC or MMF for more than 8 weeks or the receipt of more than two intravenous doses of CYC in the past; use of CYC and/or MMF in the 30 days prior to randomization; active infection; other serious concomitant medical illness and chronic debilitating illness. Use of medications with disease-modifying properties within the past month. |                |                |
| Interventions                       | Treatment: oral cyclophosphamide $\leq$ 2 mg/kg daily for 1 year followed by placebo for another year<br>Comparator: mycophenolate mofetil 1500 mg twice daily                                                                                                                                                                                                                                                                                                                                                                                                                                                                                                                                                                                                                                                                           |                |                |
| Concomitant medications             | n.a                                                                                                                                                                                                                                                                                                                                                                                                                                                                                                                                                                                                                                                                                                                                                                                                                                      |                |                |
| Primary outcome                     | Change in FVC % of predicted at 12 and 24 months                                                                                                                                                                                                                                                                                                                                                                                                                                                                                                                                                                                                                                                                                                                                                                                         |                |                |
| Secondary outcomes                  | Total lung capacity as a Percent of the Age, Height, Gender, and Ethnicity Adjusted Predicted Value Single-breath<br>DLCO, as a Percent of the Age, Height, Gender, and Ethnicity Adjusted Predicted Value<br>Fibrosis Score, as Measured by HRCT<br>Transitional Dyspnea Index Score<br>HAQ-DI<br>Skin Involvement, as measured by the mRSS<br>Toxicity, as Measured by Adverse Events, Serious Adverse Events, and Death<br>Tolerability, as Assessed by the Time to Withdrawal from the Study Drug or Meeting Protocol-defined Criteria for Treatment Failure.                                                                                                                                                                                                                                                                        |                |                |
| Patients available for the analysis | 59 MMF, 51 CYC for FVC;<br>58 MMF, 51 CYC for DLCO<br>69 MMF, 73 CYC for the others outcomes                                                                                                                                                                                                                                                                                                                                                                                                                                                                                                                                                                                                                                                                                                                                             |                |                |
| Outcomes included in the NMA        | 1: Absolute change in "FVC % of predicted" value at 12 months from baseline<br>2: Absolute change in "DLCO % of predicted" value at 12 months from baseline<br>3: Number of patients with SAEs at the longest available follow-up<br>4: Number of patients discontinuing treatment for AEs<br>5: Deaths at the longest available follow-up<br>Outcomes at 12 months were available on Study Results at ClinicalTrials.gov NCT00883129 <a href="https://clinicaltrials.gov/ct2/show/results/NCT00883129?term=Tashkin%2C+MMF&amp;draw=2&amp;rank=1">https://clinicaltrials.gov/ct2/show/results/NCT00883129?term=Tashkin%2C+MMF&amp;draw=2&amp;rank=1</a>                                                                                                                                                                                  |                |                |
| Sponsor                             | Investigator-initiated                                                                                                                                                                                                                                                                                                                                                                                                                                                                                                                                                                                                                                                                                                                                                                                                                   |                |                |
| Funding                             | National Heart, Lung and Blood Institute/National Institutes of Health                                                                                                                                                                                                                                                                                                                                                                                                                                                                                                                                                                                                                                                                                                                                                                   |                |                |
| Trial registration                  | ClinicalTrials.gov NCT00883129.                                                                                                                                                                                                                                                                                                                                                                                                                                                                                                                                                                                                                                                                                                                                                                                                          |                |                |
| Summary statistics (outcome)        | mean (95% CI) (1, 2)<br>n (3-5)                                                                                                                                                                                                                                                                                                                                                                                                                                                                                                                                                                                                                                                                                                                                                                                                          |                |                |
| Imputed variables                   | 1) SD<br>2) SD of change                                                                                                                                                                                                                                                                                                                                                                                                                                                                                                                                                                                                                                                                                                                                                                                                                 |                |                |
| Formula                             | 1) Sample size <60 $SD = \sqrt{n} * (\text{Upper limit of CI} - \text{Lower limit of CI}) / 2t$<br>t value for a 95% confidence interval from a sample size <60 = $\text{tinv}(0.05, n-1)$<br>2) SD change = $\sqrt{SD_{\text{baseline}}^2 + SD_{\text{final}}^2 - (2 * \text{Corr} * SD_{\text{baseline}} * SD_{\text{final}})}$ . Corr=0.8                                                                                                                                                                                                                                                                                                                                                                                                                                                                                             |                |                |
|                                     | Summary statistics                                                                                                                                                                                                                                                                                                                                                                                                                                                                                                                                                                                                                                                                                                                                                                                                                       | CYC n=51       | MMF n= 59      |
| 1.Change FVC % predicted            | mean $\pm$ SD                                                                                                                                                                                                                                                                                                                                                                                                                                                                                                                                                                                                                                                                                                                                                                                                                            | 3.36 $\pm$ 6.6 | 1.93 $\pm$ 6.9 |

|                                                       |                    |                                                                                                                                                                                                                                                                                                                                                                                                                                                                                                                                                                                                                                                                                                                                                                                                                                                                                                            |                       |
|-------------------------------------------------------|--------------------|------------------------------------------------------------------------------------------------------------------------------------------------------------------------------------------------------------------------------------------------------------------------------------------------------------------------------------------------------------------------------------------------------------------------------------------------------------------------------------------------------------------------------------------------------------------------------------------------------------------------------------------------------------------------------------------------------------------------------------------------------------------------------------------------------------------------------------------------------------------------------------------------------------|-----------------------|
|                                                       | Summary statistics | CYC n=51                                                                                                                                                                                                                                                                                                                                                                                                                                                                                                                                                                                                                                                                                                                                                                                                                                                                                                   | MMF n= 58             |
| 2.Change DLCO % predicted                             | mean ± SD          | -7.88 ± 10.3                                                                                                                                                                                                                                                                                                                                                                                                                                                                                                                                                                                                                                                                                                                                                                                                                                                                                               | -5.58 ± 9.3           |
|                                                       | Summary statistics | CYC n=73                                                                                                                                                                                                                                                                                                                                                                                                                                                                                                                                                                                                                                                                                                                                                                                                                                                                                                   | MMF n= 69             |
| 3.Number of patients with SAEs                        | n                  | 22                                                                                                                                                                                                                                                                                                                                                                                                                                                                                                                                                                                                                                                                                                                                                                                                                                                                                                         | 27                    |
| 4. Number of patients discontinuing treatment for AEs | n                  | 15                                                                                                                                                                                                                                                                                                                                                                                                                                                                                                                                                                                                                                                                                                                                                                                                                                                                                                         | 7                     |
| 5. Deaths                                             | n                  | 11                                                                                                                                                                                                                                                                                                                                                                                                                                                                                                                                                                                                                                                                                                                                                                                                                                                                                                         | 5                     |
| Risk of Bias (RoB)                                    |                    | Author's judgment                                                                                                                                                                                                                                                                                                                                                                                                                                                                                                                                                                                                                                                                                                                                                                                                                                                                                          | Support for judgement |
| Random sequence generation                            | Low risk           | "Randomly assigned patients using a double-blind, double-dummy, center-blocked design"                                                                                                                                                                                                                                                                                                                                                                                                                                                                                                                                                                                                                                                                                                                                                                                                                     |                       |
| Allocation concealment                                | Low risk           | Not explicitly stated. However, it is likely that a process of central allocation (pharmacy controlled) was used.                                                                                                                                                                                                                                                                                                                                                                                                                                                                                                                                                                                                                                                                                                                                                                                          |                       |
| Blinding of participants and personnel                | Low risk           | Central pharmacy formulated "all study drugs (25 mg of CYC, 250 mg of MMF or placebo) into matching 250 mg gel-capsules. Patients received medications as single dose packages containing either 6 or 8 capsules, depending upon patient weight, with the composition of the capsules (active vs placebo) adjusted by the pharmacist to administer the required daily dose while maintaining the blind"                                                                                                                                                                                                                                                                                                                                                                                                                                                                                                    |                       |
| Blinding of outcome assessment                        | Low risk           | Not stated. However blinding of pulmonary function technologists is likely to be that of the previous study from Tashkin DP (Tashkin DP 2006: "FVC, the primary endpoint, and the other physiological measures were determined by trained, project-certified hospital-based pulmonary function technologists").                                                                                                                                                                                                                                                                                                                                                                                                                                                                                                                                                                                            |                       |
| Incomplete outcome data                               | Low risk           | "In the CYC arm, 36 patients prematurely stopped drug treatment (2 deaths, 2 treatment failures, and 32 other withdrawals), while only 20 patients in the MMF arm prematurely stopped drug treatment (1 death, 0 treatment failures, 19 other withdrawals)".<br><br>"A modified intention-to-treat principle was applied to all analyses using an inferential joint model consisting of a mixed effects model for longitudinal outcomes and a survival model to handle non-ignorable missing data due to study dropout, treatment failure or death (i.e. likely related to disease or treatment and therefore not random). Consistent with the intention-to-treat principle, treatment failures and others who prematurely withdrew from the double-blind treatment phase were encouraged to return for outcome monitoring at the 12, 18 and 24 month visits and their outcomes included in the analysis." |                       |
| Selective reporting                                   | Low risk           | Protocol is available (ClinicalTrials.gov, NCT00883129). All outcome of interest for this NMA have been reported in the pre-specified way.                                                                                                                                                                                                                                                                                                                                                                                                                                                                                                                                                                                                                                                                                                                                                                 |                       |
| Other bias                                            | Low risk           |                                                                                                                                                                                                                                                                                                                                                                                                                                                                                                                                                                                                                                                                                                                                                                                                                                                                                                            |                       |
| Overall RoB                                           | Low risk           |                                                                                                                                                                                                                                                                                                                                                                                                                                                                                                                                                                                                                                                                                                                                                                                                                                                                                                            |                       |

|                                        |                                                                                                                                                                                                                                                                                                                                                                                                      |                                                                                                                                                              |                 |
|----------------------------------------|------------------------------------------------------------------------------------------------------------------------------------------------------------------------------------------------------------------------------------------------------------------------------------------------------------------------------------------------------------------------------------------------------|--------------------------------------------------------------------------------------------------------------------------------------------------------------|-----------------|
| 3. Domiciano DS, 2011                  |                                                                                                                                                                                                                                                                                                                                                                                                      |                                                                                                                                                              |                 |
| Methods                                | Design: randomized, open-label controlled study<br>Duration: 12 months<br>Location: Brazil<br>Years: 2002-2004                                                                                                                                                                                                                                                                                       |                                                                                                                                                              |                 |
| Participants                           | Population: 18 participants were randomised to cyclophosphamide, CYC (9) and cyclophosphamide + prednisone, CYCPRED (9)                                                                                                                                                                                                                                                                              |                                                                                                                                                              |                 |
| Baseline characteristics               | Age, mean $\pm$ SD years: 44.6 $\pm$ 7.9 CYC, 41.2 $\pm$ 10.6 CYCPRED<br>% female: 100<br>Disease duration, mean $\pm$ SD years: 5.8 $\pm$ 3.9 CYC, 6.0 $\pm$ 2.3 CYCPRED<br>Diffuse SSc %: 66.7 CYC, 44.4 CYCPRED<br>Baseline FVC % predicted, mean $\pm$ SD: 67.3 $\pm$ 16.4 CYC, 64.7 $\pm$ 7.7 CYCPRED<br>Baseline DLCO % predicted: mean $\pm$ SD: 61.8 $\pm$ 16.8 CYC, 69.8 $\pm$ 22.5 CYCPRED |                                                                                                                                                              |                 |
| Inclusion criteria                     | Fulfilment of SSc diagnostic criteria.<br>NSIP pattern on lung biopsy                                                                                                                                                                                                                                                                                                                                |                                                                                                                                                              |                 |
| Exclusion criteria                     | n.a                                                                                                                                                                                                                                                                                                                                                                                                  |                                                                                                                                                              |                 |
| Interventions                          | Treatment: CYC IV with monthly infusions of 1 g/m2/dose during 12 months<br>Comparator: CYC+PRED with CYC IV in similar dosage associated to prednisone 60 mg per day during 1 month followed by decreased dosages reaching 10 mg a day on the end of the second month and maintaining the same dose until the end of the treatment                                                                  |                                                                                                                                                              |                 |
| Concomitant medications                | Other immunosuppressive agents as D-penicillamine, azathioprine, and methotrexate were not allowed 6 months before and during treatment.                                                                                                                                                                                                                                                             |                                                                                                                                                              |                 |
| Primary outcomes                       | Changes in Pulmonary Function Test immediately after treatment (1year) and in prolonged follow-up (after 3 years).                                                                                                                                                                                                                                                                                   |                                                                                                                                                              |                 |
| Secondary outcomes                     | Changes in mRSS<br>Mortality rate                                                                                                                                                                                                                                                                                                                                                                    |                                                                                                                                                              |                 |
| Patients available for the analysis    | 9 CYC, 9 CYCPRED for FVC<br>5 CYC, 6 CYCPRED for DLCO                                                                                                                                                                                                                                                                                                                                                |                                                                                                                                                              |                 |
| Outcomes included in the NMA           | 1: Absolute change in "FVC % of predicted value" at 1 year from baseline<br>2: Absolute change in "DLCO % of predicted value" at 1 year from baseline<br>3: Deaths at the longest available follow-up                                                                                                                                                                                                |                                                                                                                                                              |                 |
| Sponsor                                | Investigator-initiated                                                                                                                                                                                                                                                                                                                                                                               |                                                                                                                                                              |                 |
| Funding                                | CNPQ (305468/ 2006-5), Federico Foundation Wilhelm Agricola Research FAPESP (2007/53982-4) and CNPQ (301576/2004-1).                                                                                                                                                                                                                                                                                 |                                                                                                                                                              |                 |
| Trial registration                     | n.a                                                                                                                                                                                                                                                                                                                                                                                                  |                                                                                                                                                              |                 |
| Summary statistics (outcome)           | mean $\pm$ SD (1,2)<br>n (3)                                                                                                                                                                                                                                                                                                                                                                         |                                                                                                                                                              |                 |
| Imputed variables                      | SD of change score                                                                                                                                                                                                                                                                                                                                                                                   |                                                                                                                                                              |                 |
| Formula                                | SD change score = $\sqrt{SD_{baseline}^2 + SD_{final}^2 - (2*Corr*SD_{baseline}*SD_{final})}$ . Corr=0.8                                                                                                                                                                                                                                                                                             |                                                                                                                                                              |                 |
|                                        | Summary statistics                                                                                                                                                                                                                                                                                                                                                                                   | CYC n=9                                                                                                                                                      | CYCPRED n=9     |
| 1.Change FVC % predicted               | mean $\pm$ SD                                                                                                                                                                                                                                                                                                                                                                                        | -2.11 $\pm$ 10.7                                                                                                                                             | -0.77 $\pm$ 5.8 |
|                                        | Summary statistics                                                                                                                                                                                                                                                                                                                                                                                   | CYC n=5                                                                                                                                                      | CYCPRED n=6     |
| 2.Change DLCO % predicted              | mean $\pm$ SD                                                                                                                                                                                                                                                                                                                                                                                        | -14.6 $\pm$ 9.1                                                                                                                                              | -4.0 $\pm$ 10.2 |
|                                        | Summary statistics                                                                                                                                                                                                                                                                                                                                                                                   | CYC n=9                                                                                                                                                      | CYCPRED n=9     |
| 3. Deaths                              | n                                                                                                                                                                                                                                                                                                                                                                                                    | 1                                                                                                                                                            | 1               |
| Risk of Bias (RoB)                     | Author's judgment                                                                                                                                                                                                                                                                                                                                                                                    | Support for judgement                                                                                                                                        |                 |
| Random sequence generation             | Unclear risk                                                                                                                                                                                                                                                                                                                                                                                         | Random sequence generation not defined                                                                                                                       |                 |
| Allocation concealment                 | High risk                                                                                                                                                                                                                                                                                                                                                                                            | Open-label trial                                                                                                                                             |                 |
| Blinding of participants and personnel | High risk                                                                                                                                                                                                                                                                                                                                                                                            | Open-label trial                                                                                                                                             |                 |
| Blinding of outcome assessment         | High risk                                                                                                                                                                                                                                                                                                                                                                                            | Open-label trial                                                                                                                                             |                 |
| Incomplete outcome data                | High risk                                                                                                                                                                                                                                                                                                                                                                                            | Change in "DLCO % of predicted outcome": 4/9 patients lost at follow-up in the CYC group and 3/9 in the CYCPRED group.<br>Likely full available set analysis |                 |
| Selective reporting                    | Unclear risk                                                                                                                                                                                                                                                                                                                                                                                         | Trial registration not available.                                                                                                                            |                 |
| Other bias                             | Unclear risk                                                                                                                                                                                                                                                                                                                                                                                         | No details available to judge                                                                                                                                |                 |
| Overall RoB                            | High risk                                                                                                                                                                                                                                                                                                                                                                                            |                                                                                                                                                              |                 |

|                                                       |                                                                                                                                                                                                                                                                                                                                                                                                                                                                                                                                                                                                                                                                                                                                                 |                                                                                                                                                                                                       |                 |
|-------------------------------------------------------|-------------------------------------------------------------------------------------------------------------------------------------------------------------------------------------------------------------------------------------------------------------------------------------------------------------------------------------------------------------------------------------------------------------------------------------------------------------------------------------------------------------------------------------------------------------------------------------------------------------------------------------------------------------------------------------------------------------------------------------------------|-------------------------------------------------------------------------------------------------------------------------------------------------------------------------------------------------------|-----------------|
| 4. Hoyles RK, 2006                                    |                                                                                                                                                                                                                                                                                                                                                                                                                                                                                                                                                                                                                                                                                                                                                 |                                                                                                                                                                                                       |                 |
| Methods                                               | Design: Multicenter, Prospective, Randomized, Double-Blind, Placebo-Controlled Trial<br>Duration: 12 months<br>Location: UK<br>Years: 1999-2003                                                                                                                                                                                                                                                                                                                                                                                                                                                                                                                                                                                                 |                                                                                                                                                                                                       |                 |
| Participants                                          | Population: 45 participants were randomised to cyclophosphamide plus azathioprine, CYCAZA (22) and placebo, PBO (23).                                                                                                                                                                                                                                                                                                                                                                                                                                                                                                                                                                                                                           |                                                                                                                                                                                                       |                 |
| Baseline characteristics                              | Age: n.a<br>% female: 77.3 CYCAZA, 65.2 PBO<br>Disease duration, median (range) months: 33 (1-204) CYCAZA, 66 (3-322) PBO<br>Diffuse SSc %: 31.8 CYCAZA, 39.1 PBO<br>Baseline FVC % predicted, mean $\pm$ SD: 80.1 $\pm$ 10.3 CYCAZA, 81.0 $\pm$ 18.8 PBO<br>Baseline DLCO % predicted, mean $\pm$ SD : 52.9 $\pm$ 11.5 CYCAZA, 55.0 $\pm$ 12.9                                                                                                                                                                                                                                                                                                                                                                                                 |                                                                                                                                                                                                       |                 |
| Inclusion criteria                                    | To be included in the study, patients had to be age 18–75 years, fulfil the American College of Rheumatology (ACR; formerly, the American Rheumatism Association) preliminary criteria for a diagnosis of SSc, have SSc-associated pulmonary fibrosis, as indicated by HRCT or thoracoscopic lung biopsy, and comply with therapy and with regular specialty center attendance.                                                                                                                                                                                                                                                                                                                                                                 |                                                                                                                                                                                                       |                 |
| Exclusion criteria                                    | Patients were excluded from the study if they had had previous AZA or CYC therapy for >3 months, had had previous high-dose oral corticosteroid therapy (30 mg of prednisolone or equivalent daily) for >3 months, had had oral corticosteroid therapy (prednisolone dosage >10 mg daily) in the 3 months before study entry, had contraindications to oral corticosteroids such as poorly controlled diabetes or severe osteoporosis, were likely to require lung transplantation within 1 year, had a history of or laboratory data suggestive of other serious systemic or psychological disease unrelated to SSc, were pregnant or lactating, exhibited evidence of alcohol or drug abuse, or were unable to give written informed consent. |                                                                                                                                                                                                       |                 |
| Interventions                                         | Treatment: 20 mg oral prednisolone on alternate days and 6 IV infusions of CYC at a dose of 600 mg/m <sup>2</sup> (mean dose 1,050 mg) at 4-week intervals, followed by oral AZA at 2.5 mg/kg/day (maximum 200 mg/day) as maintenance therapy.<br>Comparator: PBO                                                                                                                                                                                                                                                                                                                                                                                                                                                                               |                                                                                                                                                                                                       |                 |
| Concomitant medications                               | n.a                                                                                                                                                                                                                                                                                                                                                                                                                                                                                                                                                                                                                                                                                                                                             |                                                                                                                                                                                                       |                 |
| Primary outcomes                                      | Change in percent predicted FVC and corrected DLCO.                                                                                                                                                                                                                                                                                                                                                                                                                                                                                                                                                                                                                                                                                             |                                                                                                                                                                                                       |                 |
| Secondary outcomes                                    | Change in dyspnoea scores (>1 grade), sustained across 2 time points, and change in HRCT extent and pattern of disease at 1 year.                                                                                                                                                                                                                                                                                                                                                                                                                                                                                                                                                                                                               |                                                                                                                                                                                                       |                 |
| Patients available for the analysis                   | 19 CYCAZA, 18 PBO for FVC and DLCO<br>22 CYCAZA, 23 PBO for number of patients discontinuing treatment for AEs                                                                                                                                                                                                                                                                                                                                                                                                                                                                                                                                                                                                                                  |                                                                                                                                                                                                       |                 |
| Outcomes included in the NMA                          | 1: Absolute change in "FVC % of predicted value" at 1 year from baseline<br>2: Absolute change in "DLCO % of predicted value" at 1 year from baseline<br>3: Number of patients discontinuing treatment for AEs                                                                                                                                                                                                                                                                                                                                                                                                                                                                                                                                  |                                                                                                                                                                                                       |                 |
| Sponsor                                               | Investigator-initiated                                                                                                                                                                                                                                                                                                                                                                                                                                                                                                                                                                                                                                                                                                                          |                                                                                                                                                                                                       |                 |
| Funding                                               | Supported by the Arthritis Research Campaign (grant 14791) and the Raynaud's & Scleroderma Association, UK.                                                                                                                                                                                                                                                                                                                                                                                                                                                                                                                                                                                                                                     |                                                                                                                                                                                                       |                 |
| Trial registration                                    | n.a                                                                                                                                                                                                                                                                                                                                                                                                                                                                                                                                                                                                                                                                                                                                             |                                                                                                                                                                                                       |                 |
| Summary statistics (outcome)                          | Mean $\pm$ SD (1,2)<br>n (3)                                                                                                                                                                                                                                                                                                                                                                                                                                                                                                                                                                                                                                                                                                                    |                                                                                                                                                                                                       |                 |
| Imputed variables                                     | SD of change score                                                                                                                                                                                                                                                                                                                                                                                                                                                                                                                                                                                                                                                                                                                              |                                                                                                                                                                                                       |                 |
| Formula                                               | SD change score = $\sqrt{SD_{baseline}^2 + SD_{final}^2 - (2 * Corr * SD_{baseline} * SD_{final})}$ . Corr=0.8                                                                                                                                                                                                                                                                                                                                                                                                                                                                                                                                                                                                                                  |                                                                                                                                                                                                       |                 |
|                                                       | Summary statistics                                                                                                                                                                                                                                                                                                                                                                                                                                                                                                                                                                                                                                                                                                                              | CYCAZA n=19                                                                                                                                                                                           | PBO n=18        |
| 1.Change FVC % predicted                              | mean $\pm$ SD                                                                                                                                                                                                                                                                                                                                                                                                                                                                                                                                                                                                                                                                                                                                   | 2.4 $\pm$ 6.8                                                                                                                                                                                         | -3.0 $\pm$ 13.0 |
| 2.Change DLCO % predicted                             | mean $\pm$ SD                                                                                                                                                                                                                                                                                                                                                                                                                                                                                                                                                                                                                                                                                                                                   | -3.3 $\pm$ 7.0                                                                                                                                                                                        | -3.2 $\pm$ 8.9  |
|                                                       | Summary statistics                                                                                                                                                                                                                                                                                                                                                                                                                                                                                                                                                                                                                                                                                                                              | CYCAZA n=22                                                                                                                                                                                           | PBO n=23        |
| 3. Number of patients discontinuing treatment for AEs | n                                                                                                                                                                                                                                                                                                                                                                                                                                                                                                                                                                                                                                                                                                                                               | 0                                                                                                                                                                                                     | 2               |
| Risk of Bias (RoB)                                    | Author's judgment                                                                                                                                                                                                                                                                                                                                                                                                                                                                                                                                                                                                                                                                                                                               | Support for judgement                                                                                                                                                                                 |                 |
| Random sequence generation                            | Low risk                                                                                                                                                                                                                                                                                                                                                                                                                                                                                                                                                                                                                                                                                                                                        | "...minimization method with balancing for the following known prognostic factors: age, baseline HRCT pattern and extent of disease, and autoantibody profile".                                       |                 |
| Allocation concealment                                | Low risk                                                                                                                                                                                                                                                                                                                                                                                                                                                                                                                                                                                                                                                                                                                                        | "Investigators were blinded to the treatment allocation" and "Randomization was undertaken ....by members of the Clinical Trials and Evaluation Unit, who were not involved in the analysis of data." |                 |
| Blinding of participants and personnel                | Low risk                                                                                                                                                                                                                                                                                                                                                                                                                                                                                                                                                                                                                                                                                                                                        |                                                                                                                                                                                                       |                 |
| Blinding of outcome assessment                        | Low risk                                                                                                                                                                                                                                                                                                                                                                                                                                                                                                                                                                                                                                                                                                                                        |                                                                                                                                                                                                       |                 |
| Incomplete outcome data                               | High risk                                                                                                                                                                                                                                                                                                                                                                                                                                                                                                                                                                                                                                                                                                                                       | "Analysis was based on intent-to-treat subject to the availability of                                                                                                                                 |                 |

|                     |              |                                                                                                                                                                                                                          |
|---------------------|--------------|--------------------------------------------------------------------------------------------------------------------------------------------------------------------------------------------------------------------------|
|                     |              | <i>data at 1 year."</i> Missing outcome data at 12-month follow-up: 3/22(13.6%) in the CYCAZA group and 5/23 (21.7%) in the Placebo group. It is not clear whether ITT has been performed imputing missing outcome data. |
| Selective reporting | Unclear risk | No protocol available. No trial registration.                                                                                                                                                                            |
| Other bias          | Low risk     |                                                                                                                                                                                                                          |
| Overall RoB         | High risk    |                                                                                                                                                                                                                          |

|                                     |                                                                                                                                                                                                                                                                                                                                                                                                                                                                                                                                                                                                                                                                                 |                 |                |
|-------------------------------------|---------------------------------------------------------------------------------------------------------------------------------------------------------------------------------------------------------------------------------------------------------------------------------------------------------------------------------------------------------------------------------------------------------------------------------------------------------------------------------------------------------------------------------------------------------------------------------------------------------------------------------------------------------------------------------|-----------------|----------------|
| 5. Naidu GSRSNK, 2020               |                                                                                                                                                                                                                                                                                                                                                                                                                                                                                                                                                                                                                                                                                 |                 |                |
| Methods                             | Design: randomized, double-blind, placebo-controlled study<br>Duration: 6 months<br>Location: India<br>Years: 2016-2018                                                                                                                                                                                                                                                                                                                                                                                                                                                                                                                                                         |                 |                |
| Participants                        | Population:                                                                                                                                                                                                                                                                                                                                                                                                                                                                                                                                                                                                                                                                     |                 |                |
| Baseline characteristics            | Age; median (range) years: 40.5(26-57) MMF, 40(19-61) PBO<br>% female: 95 MMF, 95.1 PBO<br>Disease duration; median (range) years: 4.5(0.75-21) MMF, 3(0.5-40) PBO<br>Diffuse SSc %: 60% MMF, 38% PBO<br>Baseline FVC % predicted, median(range): 75.6(70-94.3) MMF, 85(70-104) PBO<br>Baseline DLCO % predicted, median(range): 43(29-66) MMF, 53(28-81) PBO                                                                                                                                                                                                                                                                                                                   |                 |                |
| Inclusion criteria                  | Patients with SSc with presence of ILD on HRCT chest<br>FVC $\geq$ 70% of predicted on pulmonary function tests<br>Age $\geq$ 18 years<br>Consenting for participating in study                                                                                                                                                                                                                                                                                                                                                                                                                                                                                                 |                 |                |
| Exclusion criteria                  | Received immunosuppression (except low dose steroids, prednisolone equivalent $\leq$ 10 mg/day) for ILD in the last 3 years<br>Persistent leukopenia or thrombocytopenia<br>Pregnant or breastfeeding females<br>Severe pulmonary arterial hypertension (mean pulmonary arterial pressure $>$ 55 mmHg) requiring drug therapy<br>Uncontrolled congestive heart failure<br>Any other abnormalities noted on chest X-ray or HRCT other than ILD<br>Active infection<br>Inflammatory myositis<br>Overlap syndrome<br>Mixed connective tissue disease<br>Other serious co-morbidities which could compromise patient's ability to complete the study                                |                 |                |
| Interventions                       | Treatment: Mycophenolate Mofetil 500 mg twice a day and increased by 500 mg every 2 weeks, if tolerated, to a target dose of 2 gram per day.<br>Comparator: placebo                                                                                                                                                                                                                                                                                                                                                                                                                                                                                                             |                 |                |
| Concomitant medications             | n.a                                                                                                                                                                                                                                                                                                                                                                                                                                                                                                                                                                                                                                                                             |                 |                |
| Primary outcome                     | Change from baseline in FVC at 6 months, after treatment with oral mycophenolate mofetil or placebo                                                                                                                                                                                                                                                                                                                                                                                                                                                                                                                                                                             |                 |                |
| Secondary outcomes                  | Change from baseline in QoL score by SF-36 at 6 months<br>Change from baseline in MDI at 6 months<br>Number of participants with serious and non-serious adverse events with MMF and placebo<br>Change in FVC from baseline to 6 months according to antibody profile                                                                                                                                                                                                                                                                                                                                                                                                           |                 |                |
| Patients available for the analysis | 15 MMF, 19 PBO for FVC and DLCO<br>20 MMF, 21 PBO for the other outcomes                                                                                                                                                                                                                                                                                                                                                                                                                                                                                                                                                                                                        |                 |                |
| Outcomes included in the NMA        | 1: Absolute change in "FVC % of predicted value at 6 months from baseline"<br>2: Absolute change in "DLCO % of predicted value at 6 months from baseline"<br>3: Number of patients with SAEs at the longest available follow-up<br>4: Number of patients discontinuing treatment for AEs                                                                                                                                                                                                                                                                                                                                                                                        |                 |                |
| Sponsor                             | Postgraduate Institute of Medical Education and Research, India                                                                                                                                                                                                                                                                                                                                                                                                                                                                                                                                                                                                                 |                 |                |
| Trial registration                  | ClinicalTrials.gov, NCT02896205.                                                                                                                                                                                                                                                                                                                                                                                                                                                                                                                                                                                                                                                |                 |                |
| Summary statistics (outcome)        | median(range), (1, 2)<br>n (3, 4)                                                                                                                                                                                                                                                                                                                                                                                                                                                                                                                                                                                                                                               |                 |                |
| Imputed variables                   | mean $\pm$ SD                                                                                                                                                                                                                                                                                                                                                                                                                                                                                                                                                                                                                                                                   |                 |                |
| Formula                             | Mean $\pm$ SD derived from median(range) with online calculator at <a href="http://www.math.hkbu.edu.hk/~tongt/papers/median2mean.html">http://www.math.hkbu.edu.hk/~tongt/papers/median2mean.html</a><br>Estimated mean of the sample from: Luo D et al. Optimally estimating the sample mean from the sample size, median, mid-range and/or mid-quartile range", <i>Statistical Methods in Medical Research</i> , 2018;27:1785-1805.<br>Estimated standard deviation of the sample from: Wan X et al. Estimating the sample mean and standard deviation from the sample size, median, range and/or interquartile range, <i>BMC Medical Research Methodology</i> 2014;14: 135. |                 |                |
|                                     | Summary statistics                                                                                                                                                                                                                                                                                                                                                                                                                                                                                                                                                                                                                                                              | MMF n=20        | PBO n=21       |
| 1.Change FVC % predicted            | mean $\pm$ SD                                                                                                                                                                                                                                                                                                                                                                                                                                                                                                                                                                                                                                                                   | -3.68 $\pm$ 8.0 | 1.28 $\pm$ 4.2 |
| 2.Change DLCO % predicted           | mean $\pm$ SD                                                                                                                                                                                                                                                                                                                                                                                                                                                                                                                                                                                                                                                                   | 2.93 $\pm$ 14.7 | 1.5 $\pm$ 10.8 |
|                                     | Summary statistics                                                                                                                                                                                                                                                                                                                                                                                                                                                                                                                                                                                                                                                              | MMF n=20        | PBO n=21       |
| 3.Number of patients with SAEs      | n                                                                                                                                                                                                                                                                                                                                                                                                                                                                                                                                                                                                                                                                               | 1               | 0              |

|                                                      |                   |                                                                                                                                                                                                                                                                                                                                            |   |
|------------------------------------------------------|-------------------|--------------------------------------------------------------------------------------------------------------------------------------------------------------------------------------------------------------------------------------------------------------------------------------------------------------------------------------------|---|
| 4.Number of patients discontinuing treatment for AEs | n                 | 3                                                                                                                                                                                                                                                                                                                                          | 0 |
| Risk of Bias (RoB)                                   | Author's judgment | Support for judgement                                                                                                                                                                                                                                                                                                                      |   |
| Random sequence generation                           | Low risk          | <i>"All eligible subjects were randomized in a 1:1 ratio in blocks of ten to the two study groups: MMF and placebo."</i>                                                                                                                                                                                                                   |   |
| Allocation concealment                               | Low risk          | <i>"Allocation concealment was ensured by enclosing the randomization sequence in sealed opaque envelopes. The primary investigator was blinded to the allocated treatment group of the study subjects and was involved in the assessment of the study subjects during the study period."</i>                                              |   |
| Blinding of participants and personnel               | Low risk          | <i>"The study drugs, namely MMF and placebo, were produced by the same manufacturer and provided as tablets of identical shape and colour and were packed into matching boxes. The drugs were dispensed to the subjects by another co-investigator, who was not involved in the randomization process and assessment of the patients."</i> |   |
| Blinding of outcome assessment                       | Low risk          |                                                                                                                                                                                                                                                                                                                                            |   |
| Incomplete outcome data                              | High risk         | Drop-out rate 5/20 (25%) in the MMF group and 3/22 (13.6%) in the placebo group. Intention to treat analysis                                                                                                                                                                                                                               |   |
| Selective reporting                                  | Low risk          | Protocol available. Trial registration. Outcomes reported in the pre-specified way                                                                                                                                                                                                                                                         |   |
| Other bias                                           | Low risk          |                                                                                                                                                                                                                                                                                                                                            |   |
| Overall RoB                                          | High risk         |                                                                                                                                                                                                                                                                                                                                            |   |

|                                        |                                                                                                                                                                                                                                                                                                                                                                                                                                                                                                                                                                                                                                                                                                                                                                                                                                                                                                                                                                                                                                                                      |                                                                                                                                                                                     |                 |
|----------------------------------------|----------------------------------------------------------------------------------------------------------------------------------------------------------------------------------------------------------------------------------------------------------------------------------------------------------------------------------------------------------------------------------------------------------------------------------------------------------------------------------------------------------------------------------------------------------------------------------------------------------------------------------------------------------------------------------------------------------------------------------------------------------------------------------------------------------------------------------------------------------------------------------------------------------------------------------------------------------------------------------------------------------------------------------------------------------------------|-------------------------------------------------------------------------------------------------------------------------------------------------------------------------------------|-----------------|
| 6. Sircar G, 2018                      |                                                                                                                                                                                                                                                                                                                                                                                                                                                                                                                                                                                                                                                                                                                                                                                                                                                                                                                                                                                                                                                                      |                                                                                                                                                                                     |                 |
| Methods                                | Design: randomized, open-label, parallel-group trial<br>Duration: 6 months<br>Location: India<br>Years: 2016-2017                                                                                                                                                                                                                                                                                                                                                                                                                                                                                                                                                                                                                                                                                                                                                                                                                                                                                                                                                    |                                                                                                                                                                                     |                 |
| Participants                           | Population: 64 participants were randomized to rituximab, RTX(32) and Cyclophosphamide, CYC (32)                                                                                                                                                                                                                                                                                                                                                                                                                                                                                                                                                                                                                                                                                                                                                                                                                                                                                                                                                                     |                                                                                                                                                                                     |                 |
| Baseline characteristics               | Age, mean $\pm$ SD years: 34.67 $\pm$ 8.13 RTX, 36.5 $\pm$ 9.73 CYC<br>% female: 83 RTX, 83 CYC<br>Disease duration, mean $\pm$ SD months: 21.5 $\pm$ 8.4 RTX, 23 $\pm$ 10.1 CYC<br>Diffuse SSc %: 100<br>Baseline FVC % predicted, mean $\pm$ SD: 61.3 $\pm$ 11.2 RTX, 59.2 $\pm$ 12.9 CYC<br>Baseline DLCO % predicted, mean $\pm$ SD: n.a                                                                                                                                                                                                                                                                                                                                                                                                                                                                                                                                                                                                                                                                                                                         |                                                                                                                                                                                     |                 |
| Inclusion criteria                     | Diffuse SSc fulfilling the 2013 ACR/EULAR classification criteria. Anti-Scl-70 antibody positivity; Age 18-60 years; Presence of interstitial lung disease by high resolution HRCT thorax. FVC% of predicted <80% but at least 45% and reproducible within 10% at the baseline visit; Onset of the patient's first symptom of SSc (including RP) within 3 years of inclusion in the trial. Baseline dyspnoea level New York Heart Association Class II and III.                                                                                                                                                                                                                                                                                                                                                                                                                                                                                                                                                                                                      |                                                                                                                                                                                     |                 |
| Exclusion criteria                     | Any immunosuppression including CYC or RTX of any length before inclusion; pregnancy or breast-feeding; active systemic infections; presence of hepatitis B and C, HIV infections or active tuberculosis; autoimmune overlap syndromes; the New York Heart Association functional class IV symptoms of shortness of breath; presence of moderate to severe pulmonary hypertension (mean pulmonary artery pressure by echocardiogram >40 mmHg), FVC of <45% predicted, ratio of FEV1 (forced expiratory volume during first second) to FVC of <65%; clinical evidence of substantial airflow obstruction; clinically significant abnormalities on HRCT not attributable to SSc; smoking within the past 6 months; persistent unexplained haematuria (>5 red blood cells per high power field); persistent leukopenia or thrombocytopenia; clinically significant anaemia (haemoglobin <80 g/l); baseline AST/ALT 1.5 times the upper limits of normal; serum creatinine >1.3 mg/dl or presence of scleroderma renal crisis and uncontrolled congestive heart failure. |                                                                                                                                                                                     |                 |
| Interventions                          | Treatment: two RTX pulses of 1000 mg at 0 and 15 days<br>Comparator: 500 mg/m <sup>2</sup> of CYC IV pulses every 4 weeks for 24 weeks.                                                                                                                                                                                                                                                                                                                                                                                                                                                                                                                                                                                                                                                                                                                                                                                                                                                                                                                              |                                                                                                                                                                                     |                 |
| Concomitant medications                | Prednisolone 10 mg/day and calcium and vitamin D throughout the course                                                                                                                                                                                                                                                                                                                                                                                                                                                                                                                                                                                                                                                                                                                                                                                                                                                                                                                                                                                               |                                                                                                                                                                                     |                 |
| Primary outcome                        | Change in FVC % predicted at 24 weeks.                                                                                                                                                                                                                                                                                                                                                                                                                                                                                                                                                                                                                                                                                                                                                                                                                                                                                                                                                                                                                               |                                                                                                                                                                                     |                 |
| Secondary outcomes                     | Absolute change in litres (FVC-l) at 6 months; mRSS at 6 months, 6-min walk test, Medsger's score (sum of individual component score) and new onset or worsening of existing pulmonary hypertension (mean pulmonary arterial pressure) estimated by echocardiographic criteria                                                                                                                                                                                                                                                                                                                                                                                                                                                                                                                                                                                                                                                                                                                                                                                       |                                                                                                                                                                                     |                 |
| Patients available for the analysis    | 30 RTX, 30 CYC                                                                                                                                                                                                                                                                                                                                                                                                                                                                                                                                                                                                                                                                                                                                                                                                                                                                                                                                                                                                                                                       |                                                                                                                                                                                     |                 |
| Outcomes included in the NMA           | 1: Absolute change in "FVC % of predicted value at 6 months from baseline<br>2: Deaths at the longest available follow-up                                                                                                                                                                                                                                                                                                                                                                                                                                                                                                                                                                                                                                                                                                                                                                                                                                                                                                                                            |                                                                                                                                                                                     |                 |
| Sponsor                                | Investigator-initiated                                                                                                                                                                                                                                                                                                                                                                                                                                                                                                                                                                                                                                                                                                                                                                                                                                                                                                                                                                                                                                               |                                                                                                                                                                                     |                 |
| Funding                                | No funding sources                                                                                                                                                                                                                                                                                                                                                                                                                                                                                                                                                                                                                                                                                                                                                                                                                                                                                                                                                                                                                                                   |                                                                                                                                                                                     |                 |
| Trial registration                     | India, www.ctri.nic.in, CTRI/2017/07/009152.                                                                                                                                                                                                                                                                                                                                                                                                                                                                                                                                                                                                                                                                                                                                                                                                                                                                                                                                                                                                                         |                                                                                                                                                                                     |                 |
| Summary statistics (outcome)           | mean $\pm$ SD (1)<br>n (2)                                                                                                                                                                                                                                                                                                                                                                                                                                                                                                                                                                                                                                                                                                                                                                                                                                                                                                                                                                                                                                           |                                                                                                                                                                                     |                 |
| Imputed variables                      | SD of change score                                                                                                                                                                                                                                                                                                                                                                                                                                                                                                                                                                                                                                                                                                                                                                                                                                                                                                                                                                                                                                                   |                                                                                                                                                                                     |                 |
| Formula                                | SD change score = $\sqrt{\text{SD}_{\text{baseline}}^2 + \text{SD}_{\text{final}}^2 - (2 * \text{Corr} * \text{SD}_{\text{baseline}} * \text{SD}_{\text{final}})}$ . Corr=0.8                                                                                                                                                                                                                                                                                                                                                                                                                                                                                                                                                                                                                                                                                                                                                                                                                                                                                        |                                                                                                                                                                                     |                 |
|                                        | Summary statistics                                                                                                                                                                                                                                                                                                                                                                                                                                                                                                                                                                                                                                                                                                                                                                                                                                                                                                                                                                                                                                                   | RTX n=30                                                                                                                                                                            | CYC n=30        |
| 1.Change FVC % predicted               | mean $\pm$ SD                                                                                                                                                                                                                                                                                                                                                                                                                                                                                                                                                                                                                                                                                                                                                                                                                                                                                                                                                                                                                                                        | 6.22 $\pm$ 8.1                                                                                                                                                                      | -1.19 $\pm$ 7.8 |
| 2.Deaths                               | n                                                                                                                                                                                                                                                                                                                                                                                                                                                                                                                                                                                                                                                                                                                                                                                                                                                                                                                                                                                                                                                                    | 1                                                                                                                                                                                   | 1               |
| Risk of Bias (RoB)                     | Author's judgment                                                                                                                                                                                                                                                                                                                                                                                                                                                                                                                                                                                                                                                                                                                                                                                                                                                                                                                                                                                                                                                    | Support for judgement                                                                                                                                                               |                 |
| Random sequence generation             | Low risk                                                                                                                                                                                                                                                                                                                                                                                                                                                                                                                                                                                                                                                                                                                                                                                                                                                                                                                                                                                                                                                             | "A computer-generated random number table was used for simple randomization".                                                                                                       |                 |
| Allocation concealment                 | Low risk                                                                                                                                                                                                                                                                                                                                                                                                                                                                                                                                                                                                                                                                                                                                                                                                                                                                                                                                                                                                                                                             | "Opaque, sequentially numbered envelopes were used to determine allocation sequence".                                                                                               |                 |
| Blinding of participants and personnel | High risk                                                                                                                                                                                                                                                                                                                                                                                                                                                                                                                                                                                                                                                                                                                                                                                                                                                                                                                                                                                                                                                            | Open-label study                                                                                                                                                                    |                 |
| Blinding of outcome assessment         | High risk                                                                                                                                                                                                                                                                                                                                                                                                                                                                                                                                                                                                                                                                                                                                                                                                                                                                                                                                                                                                                                                            | Open-label study                                                                                                                                                                    |                 |
| Incomplete outcome data                | Low risk                                                                                                                                                                                                                                                                                                                                                                                                                                                                                                                                                                                                                                                                                                                                                                                                                                                                                                                                                                                                                                                             | 30/32 patients in each group completed the study.                                                                                                                                   |                 |
| Selective reporting                    | High risk                                                                                                                                                                                                                                                                                                                                                                                                                                                                                                                                                                                                                                                                                                                                                                                                                                                                                                                                                                                                                                                            | Lack of correspondence between primary and secondary outcome reported in the registered protocol (CTRI/2017/07/009152) and reported in the paper. Trial registered retrospectively. |                 |
| Other bias                             | Low risk                                                                                                                                                                                                                                                                                                                                                                                                                                                                                                                                                                                                                                                                                                                                                                                                                                                                                                                                                                                                                                                             |                                                                                                                                                                                     |                 |
| Overall RoB                            | High risk                                                                                                                                                                                                                                                                                                                                                                                                                                                                                                                                                                                                                                                                                                                                                                                                                                                                                                                                                                                                                                                            |                                                                                                                                                                                     |                 |

|                                                      |                                                                                                                                                                                                                                                                                                                                                                                                                                                                                                                                                                                                                                                                                                                                                                                                                                                                                                                                                                                                                                                                                                                                                                                                                                                                                                                                                                                                                                                                                                                                                                                                                                                                                                                                                                                                                                                                                                                                                                                                                                                                                          |                       |                 |
|------------------------------------------------------|------------------------------------------------------------------------------------------------------------------------------------------------------------------------------------------------------------------------------------------------------------------------------------------------------------------------------------------------------------------------------------------------------------------------------------------------------------------------------------------------------------------------------------------------------------------------------------------------------------------------------------------------------------------------------------------------------------------------------------------------------------------------------------------------------------------------------------------------------------------------------------------------------------------------------------------------------------------------------------------------------------------------------------------------------------------------------------------------------------------------------------------------------------------------------------------------------------------------------------------------------------------------------------------------------------------------------------------------------------------------------------------------------------------------------------------------------------------------------------------------------------------------------------------------------------------------------------------------------------------------------------------------------------------------------------------------------------------------------------------------------------------------------------------------------------------------------------------------------------------------------------------------------------------------------------------------------------------------------------------------------------------------------------------------------------------------------------------|-----------------------|-----------------|
| 7. SENSISCIS, 2019                                   |                                                                                                                                                                                                                                                                                                                                                                                                                                                                                                                                                                                                                                                                                                                                                                                                                                                                                                                                                                                                                                                                                                                                                                                                                                                                                                                                                                                                                                                                                                                                                                                                                                                                                                                                                                                                                                                                                                                                                                                                                                                                                          |                       |                 |
| Methods                                              | Design: randomized, double-blind, placebo-controlled trial<br>Duration: 1 year<br>Location: International, 32 countries.<br>Years: 2015-2017                                                                                                                                                                                                                                                                                                                                                                                                                                                                                                                                                                                                                                                                                                                                                                                                                                                                                                                                                                                                                                                                                                                                                                                                                                                                                                                                                                                                                                                                                                                                                                                                                                                                                                                                                                                                                                                                                                                                             |                       |                 |
| Participants                                         | Population: 580 participants were randomised to nintedanib, NTD (288) and placebo, PBO (288).                                                                                                                                                                                                                                                                                                                                                                                                                                                                                                                                                                                                                                                                                                                                                                                                                                                                                                                                                                                                                                                                                                                                                                                                                                                                                                                                                                                                                                                                                                                                                                                                                                                                                                                                                                                                                                                                                                                                                                                            |                       |                 |
| Baseline characteristics                             | Age, mean $\pm$ SD: 54.6 $\pm$ 11.8 NTD, 53.4 $\pm$ 12.6 PBO<br>% female: 76.7 NTD, 73.6 PBO<br>Disease duration; median (range) yrs.: 3.4 (0.3-7.1) NTD, 3.5(0.4-7.2) PBO<br>Diffuse SSc %: 53.1 NTD, 50.7 PBO<br>Baseline FVC % predicted, mean $\pm$ SD: 72.4 $\pm$ 16.8 NTD, 72.7 $\pm$ 16.6 PBO<br>Baseline DLCO % predicted, mean $\pm$ SD: 52.9 $\pm$ 15.1 NTD, 53.2 $\pm$ 15.1 PBO                                                                                                                                                                                                                                                                                                                                                                                                                                                                                                                                                                                                                                                                                                                                                                                                                                                                                                                                                                                                                                                                                                                                                                                                                                                                                                                                                                                                                                                                                                                                                                                                                                                                                               |                       |                 |
| Inclusion criteria                                   | SSc according to 2013 ACR/EULAR classification criteria. Age $\geq$ 18 yrs. Onset of the first non-Raynaud's symptom within 7 years before screening. Lung fibrosis affecting at least 10% of the lungs at HRTC. FVC $\geq$ 40% of the predicted value and a DLCO 30 to 89% of the predicted value.                                                                                                                                                                                                                                                                                                                                                                                                                                                                                                                                                                                                                                                                                                                                                                                                                                                                                                                                                                                                                                                                                                                                                                                                                                                                                                                                                                                                                                                                                                                                                                                                                                                                                                                                                                                      |                       |                 |
| Exclusion criteria                                   | AST, ALT $>$ 1.5 x ULN. 2. Bilirubin $>$ 1.5 x ULN. 3. Creatinine clearance $<$ 30 mL/min. pre-bronchodilator FEV1/FVC $<$ 0.7); Significant pulmonary hypertension; Severe hypertension; Myocardial infarction within 6 months of Visit 1. Unstable cardiac angina within 6 months; More than 3 digital fingertip ulcers at Visit 2 or a history of severe digital necrosis requiring hospitalization; High bleeding risk; History of thrombotic event; Known hypersensitivity to the trial medication or its components; Life expectancy of $<$ 2.5 years for disease other than SSc in investigator assessment; Patients with clinical signs of malabsorption or needing parenteral nutrition; Previous treatment with nintedanib or pirfenidone. Other investigational therapy received within 1 month or 6 half-lives (whichever was greater) prior to screening Visit (Visit 1). Treatment with: Prednisone $>$ 10 mg/day or equivalent received within 2 weeks prior Visit 2, b. Azathioprine, hydroxychloroquine, colchicine, D-penicillamine, sulfasalazine, received within 8 weeks prior Visit 2, c. Cyclophosphamide, rituximab, tocilizumab, abatacept, leflunomide, tacrolimus, newer anti-arthritic treatments like tofacitinib and cyclosporine A, potassium paraaminobenzoate, received within 6 months prior Visit 2; Unstable background therapy with either mycophenolate mofetil or methotrexate (combined therapy of both not allowed). Patients have to be either a. not on immunosuppressive therapy, or b. on stable therapy with either mycophenolate mofetil or methotrexate for 6 months prior Visit 2 and should stay stable on this background therapy for at least 6 months after randomization; Previous hematopoietic stem cell transplantation (HSCT), or HSCT planned within the next year. Major surgical procedures planned to occur during trial period; Women who are pregnant, nursing, or who plan to become pregnant while in the trial: Women of childbearing potential not willing or able to use highly effective methods of birth control. |                       |                 |
| Interventions                                        | Treatment: nintedanib 150 mg twice daily<br>Comparator: Placebo                                                                                                                                                                                                                                                                                                                                                                                                                                                                                                                                                                                                                                                                                                                                                                                                                                                                                                                                                                                                                                                                                                                                                                                                                                                                                                                                                                                                                                                                                                                                                                                                                                                                                                                                                                                                                                                                                                                                                                                                                          |                       |                 |
| Concomitant medications                              | Prednisone at a dose of up to 10 mg per day or mycophenolate or methotrexate at a stable dose for at least 6 months before randomization (or both therapies) were allowed as concomitant medications.                                                                                                                                                                                                                                                                                                                                                                                                                                                                                                                                                                                                                                                                                                                                                                                                                                                                                                                                                                                                                                                                                                                                                                                                                                                                                                                                                                                                                                                                                                                                                                                                                                                                                                                                                                                                                                                                                    |                       |                 |
| Primary outcome                                      | Annual rate of decline in FVC assessed over a 52-week period.                                                                                                                                                                                                                                                                                                                                                                                                                                                                                                                                                                                                                                                                                                                                                                                                                                                                                                                                                                                                                                                                                                                                                                                                                                                                                                                                                                                                                                                                                                                                                                                                                                                                                                                                                                                                                                                                                                                                                                                                                            |                       |                 |
| Secondary outcomes                                   | Absolute changes from baseline in the modified Rodnan skin score and in the total score on the St. George's Respiratory Questionnaire at week 52.                                                                                                                                                                                                                                                                                                                                                                                                                                                                                                                                                                                                                                                                                                                                                                                                                                                                                                                                                                                                                                                                                                                                                                                                                                                                                                                                                                                                                                                                                                                                                                                                                                                                                                                                                                                                                                                                                                                                        |                       |                 |
| Patients available for the analysis                  | 288 NTD, 288 PBO                                                                                                                                                                                                                                                                                                                                                                                                                                                                                                                                                                                                                                                                                                                                                                                                                                                                                                                                                                                                                                                                                                                                                                                                                                                                                                                                                                                                                                                                                                                                                                                                                                                                                                                                                                                                                                                                                                                                                                                                                                                                         |                       |                 |
| Outcomes included in the NMA                         | 1: Absolute change in "DLCO % of predicted value" at 52 weeks from baseline<br>2: Number of patients with SAEs at the longest available follow-up<br>3: Number of patients discontinuing treatment for AEs<br>4: Number of deaths at the longest available follow-up                                                                                                                                                                                                                                                                                                                                                                                                                                                                                                                                                                                                                                                                                                                                                                                                                                                                                                                                                                                                                                                                                                                                                                                                                                                                                                                                                                                                                                                                                                                                                                                                                                                                                                                                                                                                                     |                       |                 |
| Sponsor                                              | Boehringer Ingelheim                                                                                                                                                                                                                                                                                                                                                                                                                                                                                                                                                                                                                                                                                                                                                                                                                                                                                                                                                                                                                                                                                                                                                                                                                                                                                                                                                                                                                                                                                                                                                                                                                                                                                                                                                                                                                                                                                                                                                                                                                                                                     |                       |                 |
| Trial registration                                   | SENSISCIS ClinicalTrials.gov number, NCT02597933                                                                                                                                                                                                                                                                                                                                                                                                                                                                                                                                                                                                                                                                                                                                                                                                                                                                                                                                                                                                                                                                                                                                                                                                                                                                                                                                                                                                                                                                                                                                                                                                                                                                                                                                                                                                                                                                                                                                                                                                                                         |                       |                 |
| Summary statistics (outcome)                         | mean $\pm$ SE (1)<br>n (2-4)                                                                                                                                                                                                                                                                                                                                                                                                                                                                                                                                                                                                                                                                                                                                                                                                                                                                                                                                                                                                                                                                                                                                                                                                                                                                                                                                                                                                                                                                                                                                                                                                                                                                                                                                                                                                                                                                                                                                                                                                                                                             |                       |                 |
| Imputed variables                                    | SD                                                                                                                                                                                                                                                                                                                                                                                                                                                                                                                                                                                                                                                                                                                                                                                                                                                                                                                                                                                                                                                                                                                                                                                                                                                                                                                                                                                                                                                                                                                                                                                                                                                                                                                                                                                                                                                                                                                                                                                                                                                                                       |                       |                 |
| Formula                                              | SD = SE $\sqrt{n}$                                                                                                                                                                                                                                                                                                                                                                                                                                                                                                                                                                                                                                                                                                                                                                                                                                                                                                                                                                                                                                                                                                                                                                                                                                                                                                                                                                                                                                                                                                                                                                                                                                                                                                                                                                                                                                                                                                                                                                                                                                                                       |                       |                 |
|                                                      | Summary statistics                                                                                                                                                                                                                                                                                                                                                                                                                                                                                                                                                                                                                                                                                                                                                                                                                                                                                                                                                                                                                                                                                                                                                                                                                                                                                                                                                                                                                                                                                                                                                                                                                                                                                                                                                                                                                                                                                                                                                                                                                                                                       | NTD n=287             | PBO n=288       |
| 1.Change DLCO % predicted                            | mean $\pm$ SD                                                                                                                                                                                                                                                                                                                                                                                                                                                                                                                                                                                                                                                                                                                                                                                                                                                                                                                                                                                                                                                                                                                                                                                                                                                                                                                                                                                                                                                                                                                                                                                                                                                                                                                                                                                                                                                                                                                                                                                                                                                                            | -3.21 $\pm$ 9.1       | -2.77 $\pm$ 9.1 |
| 2.Number of patients with SAEs                       | n                                                                                                                                                                                                                                                                                                                                                                                                                                                                                                                                                                                                                                                                                                                                                                                                                                                                                                                                                                                                                                                                                                                                                                                                                                                                                                                                                                                                                                                                                                                                                                                                                                                                                                                                                                                                                                                                                                                                                                                                                                                                                        | 69                    | 62              |
| 3.Number of patients discontinuing treatment for AEs | n                                                                                                                                                                                                                                                                                                                                                                                                                                                                                                                                                                                                                                                                                                                                                                                                                                                                                                                                                                                                                                                                                                                                                                                                                                                                                                                                                                                                                                                                                                                                                                                                                                                                                                                                                                                                                                                                                                                                                                                                                                                                                        | 46                    | 25              |
| 4.Deaths                                             | n                                                                                                                                                                                                                                                                                                                                                                                                                                                                                                                                                                                                                                                                                                                                                                                                                                                                                                                                                                                                                                                                                                                                                                                                                                                                                                                                                                                                                                                                                                                                                                                                                                                                                                                                                                                                                                                                                                                                                                                                                                                                                        | 10                    | 9               |
| Risk of Bias (RoB)                                   | Author's judgment                                                                                                                                                                                                                                                                                                                                                                                                                                                                                                                                                                                                                                                                                                                                                                                                                                                                                                                                                                                                                                                                                                                                                                                                                                                                                                                                                                                                                                                                                                                                                                                                                                                                                                                                                                                                                                                                                                                                                                                                                                                                        | Support for judgement |                 |

|                                        |          |                                                                                                                                                                                                                                                                                                                                                                                                                                                                                                                                                                                                                            |
|----------------------------------------|----------|----------------------------------------------------------------------------------------------------------------------------------------------------------------------------------------------------------------------------------------------------------------------------------------------------------------------------------------------------------------------------------------------------------------------------------------------------------------------------------------------------------------------------------------------------------------------------------------------------------------------------|
| Random sequence generation             | Low risk | <i>"The randomisation list will be generated using a validated system, which involves a pseudo-random number generator so that the resulting treatment will be both reproducible and non-predictable. The block size will be documented in the clinical trial report. Access to the codes will be controlled and documented. All members of the clinical trial team will remain blinded to the randomization schedule until the final database is locked."</i>                                                                                                                                                             |
| Allocation concealment                 | Low risk | <i>"Patients, investigators and everyone involved in trial conduct or analysis or with any other interest in this double-blind trial (apart from the DMC) will remain blinded with regard to the randomised treatment assignments until after database lock. The randomization code will be kept secret by the sponsor's clinical trial support up to database lock. The DMC may review unblinded data upon request, and only under conditions that ensure that patients, investigators and everyone involved in trial conduct or analysis or with any other interest in this double-blind trial will remain blinded."</i> |
| Blinding of participants and personnel | Low risk | <i>"Trial medication is identified by a medication code number. Packaging and labelling will be otherwise identical"</i>                                                                                                                                                                                                                                                                                                                                                                                                                                                                                                   |
| Blinding of outcome assessment         | Low risk | <i>"The effect of missing data will be investigated using multiple imputation methods which assume that patients who discontinue treatment will no longer benefit from it in the future."</i>                                                                                                                                                                                                                                                                                                                                                                                                                              |
| Incomplete outcome data                | Low risk | Multiple imputation analysis and sensitivity analysis.                                                                                                                                                                                                                                                                                                                                                                                                                                                                                                                                                                     |
| Selective reporting                    | Low risk | Protocol available. Trial registered at ClinicalTrials.gov, NCT02597933                                                                                                                                                                                                                                                                                                                                                                                                                                                                                                                                                    |
| Other bias                             | Low risk |                                                                                                                                                                                                                                                                                                                                                                                                                                                                                                                                                                                                                            |
| Overall RoB                            | Low risk |                                                                                                                                                                                                                                                                                                                                                                                                                                                                                                                                                                                                                            |

|                                                       |                                                                                                                                                                                                                                                                                                                                                                                                                                                                                                                                                                                                                                                                                 |                                                                                                                                                                      |                  |
|-------------------------------------------------------|---------------------------------------------------------------------------------------------------------------------------------------------------------------------------------------------------------------------------------------------------------------------------------------------------------------------------------------------------------------------------------------------------------------------------------------------------------------------------------------------------------------------------------------------------------------------------------------------------------------------------------------------------------------------------------|----------------------------------------------------------------------------------------------------------------------------------------------------------------------|------------------|
| 8. Acharya N, 2019                                    |                                                                                                                                                                                                                                                                                                                                                                                                                                                                                                                                                                                                                                                                                 |                                                                                                                                                                      |                  |
| Methods                                               | Design: double blind, randomised, placebo-controlled trial<br>Duration: 6 months<br>Location: India<br>Years: 2017-2018                                                                                                                                                                                                                                                                                                                                                                                                                                                                                                                                                         |                                                                                                                                                                      |                  |
| Participants                                          | Population: 34 participants were randomised to pirfenidone, PFD (17) and placebo, PBO (17)                                                                                                                                                                                                                                                                                                                                                                                                                                                                                                                                                                                      |                                                                                                                                                                      |                  |
| Baseline characteristics                              | Age; median (range) years: 42(26-55) PFD, 40(20-63) PBO<br>% female: 100 PFD, 82.4 PBO<br>Disease duration, median(range) years: 4(1-7) PFD, 3(0.5-7) PBO<br>Diffuse SSc %: 35 PFD, 35 PBO<br>Baseline FVC % predicted, median(range): 65(51-75) PFD, 62.7(52-78) PBO<br>Baseline DLCO % predicted, median(range): 45(35-65) PFD, 50(34-89) PBO                                                                                                                                                                                                                                                                                                                                 |                                                                                                                                                                      |                  |
| Inclusion criteria                                    | SSc classified using ACR 2013 classification criteria<br>ILD confirmed on HRCT<br>FVC between 50 and 80% of the predicted<br>DLCO > 30% of the predicted<br>A disease duration of less than seven years since the onset of the first non-Raynaud's symptom<br>No new immunosuppressive treatment administered in the previous six months.                                                                                                                                                                                                                                                                                                                                       |                                                                                                                                                                      |                  |
| Exclusion criteria                                    | Presence of co-existent inflammatory myopathy<br>Severe PAH requiring specific therapy<br>Persistent cytopenia, any other pulmonary abnormalities on imaging apart from ILD, Clinically significant heart failure<br>Use of biologics in the past<br>Abnormal liver functions (transaminases > 3× upper limit of normal (ULN), bilirubin > 1.5× ULN).                                                                                                                                                                                                                                                                                                                           |                                                                                                                                                                      |                  |
| Interventions                                         | Treatment: pirfenidone was started at 600 mg/day and increased to 2400 mg/day over one month and continued for the trial period.<br>Comparator: placebo                                                                                                                                                                                                                                                                                                                                                                                                                                                                                                                         |                                                                                                                                                                      |                  |
| Concomitant medications                               | Subjects receiving stable doses of cyclophosphamide, mycophenolate mofetil, azathioprine, methotrexate and/or prednisolone (or equivalent) ≤ 10 mg/day in the preceding 6 months (or more) were not excluded.                                                                                                                                                                                                                                                                                                                                                                                                                                                                   |                                                                                                                                                                      |                  |
| Primary outcome                                       | Primary outcome was to compare the proportion of patients with stabilisation or improvement in lung functions (FVC).                                                                                                                                                                                                                                                                                                                                                                                                                                                                                                                                                            |                                                                                                                                                                      |                  |
| Secondary outcomes                                    | Secondary outcome was to compare the change in FVC, Mahler's dyspnoea index, 6 minute walk distance, mRSS and change in serum levels of tumour necrosis factor $\alpha$ and tissue growth factor $\beta$ at the end of 6 months.                                                                                                                                                                                                                                                                                                                                                                                                                                                |                                                                                                                                                                      |                  |
| Patients available for the analysis                   | 17 PFD, 17 PBO                                                                                                                                                                                                                                                                                                                                                                                                                                                                                                                                                                                                                                                                  |                                                                                                                                                                      |                  |
| Outcomes included in the NMA                          | 1: Absolute change in "FVC % of predicted value at 12 months from baseline<br>2: Number of patients discontinuing treatment for AEs<br>3: Deaths at the longest available follow-up                                                                                                                                                                                                                                                                                                                                                                                                                                                                                             |                                                                                                                                                                      |                  |
| Sponsor                                               | Investigator-initiated                                                                                                                                                                                                                                                                                                                                                                                                                                                                                                                                                                                                                                                          |                                                                                                                                                                      |                  |
| Funding                                               | n.a                                                                                                                                                                                                                                                                                                                                                                                                                                                                                                                                                                                                                                                                             |                                                                                                                                                                      |                  |
| Trial registration                                    | (CTRI/2018/01/011449)                                                                                                                                                                                                                                                                                                                                                                                                                                                                                                                                                                                                                                                           |                                                                                                                                                                      |                  |
| Summary statistics (outcome)                          | Median (range) (1)                                                                                                                                                                                                                                                                                                                                                                                                                                                                                                                                                                                                                                                              |                                                                                                                                                                      |                  |
| Imputed variables                                     | mean $\pm$ SD (1)<br>n (2, 3)                                                                                                                                                                                                                                                                                                                                                                                                                                                                                                                                                                                                                                                   |                                                                                                                                                                      |                  |
| Formula                                               | Mean $\pm$ SD derived from median(range) with online calculator at <a href="http://www.math.hkbu.edu.hk/~tongt/papers/median2mean.html">http://www.math.hkbu.edu.hk/~tongt/papers/median2mean.html</a><br>Estimated mean of the sample from: Luo D et al. Optimally estimating the sample mean from the sample size, median, mid-range and/or mid-quartile range", <i>Statistical Methods in Medical Research</i> , 2018.27:1785-1805.<br>Estimated standard deviation of the sample from: Wan X et al. Estimating the sample mean and standard deviation from the sample size, median, range and/or interquartile range, <i>BMC Medical Research Methodology</i> 2014.14: 135. |                                                                                                                                                                      |                  |
|                                                       | Summary statistics                                                                                                                                                                                                                                                                                                                                                                                                                                                                                                                                                                                                                                                              | PFD n= 17                                                                                                                                                            | PBO n= 17        |
| 1.Change FVC % predicted                              | mean $\pm$ SD                                                                                                                                                                                                                                                                                                                                                                                                                                                                                                                                                                                                                                                                   | -0.69 $\pm$ 4.4                                                                                                                                                      | -4.25 $\pm$ 14.8 |
| 2. Number of patients discontinuing treatment for AEs | n                                                                                                                                                                                                                                                                                                                                                                                                                                                                                                                                                                                                                                                                               | 3                                                                                                                                                                    | 0                |
| 3.Deaths                                              | n                                                                                                                                                                                                                                                                                                                                                                                                                                                                                                                                                                                                                                                                               | 0                                                                                                                                                                    | 0                |
| Risk of Bias (RoB)                                    | Author's judgment                                                                                                                                                                                                                                                                                                                                                                                                                                                                                                                                                                                                                                                               | Support for judgement                                                                                                                                                |                  |
| Random sequence generation                            | Low risk                                                                                                                                                                                                                                                                                                                                                                                                                                                                                                                                                                                                                                                                        | "Subjects were randomised in a 1:1 ratio to pirfenidone and placebo groups using a computerised random number generator with blocks of variable size (four or six)". |                  |
| Allocation concealment                                | Low risk                                                                                                                                                                                                                                                                                                                                                                                                                                                                                                                                                                                                                                                                        | "Allocation concealment was ensured by enclosing the randomization                                                                                                   |                  |

|                                        |          |                                                                                                                                                         |
|----------------------------------------|----------|---------------------------------------------------------------------------------------------------------------------------------------------------------|
|                                        |          | <i>sequence in sealed opaque envelopes”.</i>                                                                                                            |
| Blinding of participants and personnel | Low risk | <i>“The study subjects, and the investigator, involved in the assessment of outcomes and data analysis were all blinded to the treatment received”.</i> |
| Blinding of outcome assessment         | Low risk | See above                                                                                                                                               |
| Incomplete outcome data                | Low risk | 3 Dropouts in PFD group and 1 dropout in PBP group. <i>“An intention to treat analysis (ITT) was performed for all outcomes”.</i>                       |
| Selective reporting                    | Low risk | Trial registration. Outcomes reported in the pre-specified way                                                                                          |
| Other bias                             | Low risk |                                                                                                                                                         |
| Overall RoB                            | Low risk |                                                                                                                                                         |

## 9. Hsu VM, 2018

|                          |                                                                                                                                                                                                                                                                                                                                                                                                                                                                                                                                                                                                                                                                                                                                                                                                                                                                                                                                                                                                                                                                                                                                                                                                                                                                                                                                                                                                                                                                                                                                                                                                                                                                                                                                                                                                                                                                                                                                                                                                                                                                                                                                                                                                                                                                                                                                                                                                                                                                                                                                                                                                                                                                                                                              |
|--------------------------|------------------------------------------------------------------------------------------------------------------------------------------------------------------------------------------------------------------------------------------------------------------------------------------------------------------------------------------------------------------------------------------------------------------------------------------------------------------------------------------------------------------------------------------------------------------------------------------------------------------------------------------------------------------------------------------------------------------------------------------------------------------------------------------------------------------------------------------------------------------------------------------------------------------------------------------------------------------------------------------------------------------------------------------------------------------------------------------------------------------------------------------------------------------------------------------------------------------------------------------------------------------------------------------------------------------------------------------------------------------------------------------------------------------------------------------------------------------------------------------------------------------------------------------------------------------------------------------------------------------------------------------------------------------------------------------------------------------------------------------------------------------------------------------------------------------------------------------------------------------------------------------------------------------------------------------------------------------------------------------------------------------------------------------------------------------------------------------------------------------------------------------------------------------------------------------------------------------------------------------------------------------------------------------------------------------------------------------------------------------------------------------------------------------------------------------------------------------------------------------------------------------------------------------------------------------------------------------------------------------------------------------------------------------------------------------------------------------------------|
| Methods                  | <p>Design: randomized, double-blind, placebo-controlled study</p> <p>Duration: 52 weeks</p> <p>Location: Multicenter</p> <p>Years: 2012</p>                                                                                                                                                                                                                                                                                                                                                                                                                                                                                                                                                                                                                                                                                                                                                                                                                                                                                                                                                                                                                                                                                                                                                                                                                                                                                                                                                                                                                                                                                                                                                                                                                                                                                                                                                                                                                                                                                                                                                                                                                                                                                                                                                                                                                                                                                                                                                                                                                                                                                                                                                                                  |
| Participants             | <p>Population: 23 participants were randomized to Pomalidomide, POMA (11) and placebo, PBO (12)</p>                                                                                                                                                                                                                                                                                                                                                                                                                                                                                                                                                                                                                                                                                                                                                                                                                                                                                                                                                                                                                                                                                                                                                                                                                                                                                                                                                                                                                                                                                                                                                                                                                                                                                                                                                                                                                                                                                                                                                                                                                                                                                                                                                                                                                                                                                                                                                                                                                                                                                                                                                                                                                          |
| Baseline characteristics | <p>Age, mean <math>\pm</math> SD years: 48.9 <math>\pm</math> 9.9 POMA, 44.8 <math>\pm</math> 13.8 PBO</p> <p>% female: 90.9 POMA, 83.3 PBO</p> <p>Disease duration, mean years: 4.7 POMA, 5.3 PBO</p> <p>Diffuse SSc %: 80 POMA, 75 PBO</p> <p>Baseline FVC % predicted, mean <math>\pm</math> SD years: 57.7 <math>\pm</math> 7.3 POMA, 60.9 <math>\pm</math> 8.6 PBO</p>                                                                                                                                                                                                                                                                                                                                                                                                                                                                                                                                                                                                                                                                                                                                                                                                                                                                                                                                                                                                                                                                                                                                                                                                                                                                                                                                                                                                                                                                                                                                                                                                                                                                                                                                                                                                                                                                                                                                                                                                                                                                                                                                                                                                                                                                                                                                                  |
| Inclusion criteria       | <p>Male or females between 18 and 80 years of age (inclusive) at the time of consent</p> <p>Diagnosis of systemic sclerosis (SSc) as defined by American College of Rheumatology (ACR) criteria</p> <p>Onset of the first non-Raynaud's manifestation of SSc within 7 years of Screening</p> <p>Subjects are required to meet at least one of the following 2 pulmonary-related criteria to be eligible for the study: Forced vital capacity (FVC) <math>\geq</math> 45% and <math>&lt;</math>70% at Screening and Baseline (Visit 2) [with or without a documented pre-specified FVC decline or fibrosis score] OR FVC readings <math>\geq</math> 70% and <math>\leq</math> 80% at Screening and Baseline (Visit 2) with a documented history of either or both of: A <math>\geq</math> 5% decrease (expressed as percent predicted or in liters) in FVC in the 24-month period prior to Baseline (Visit 2) based on 3 or more assessments. Two assessments may be done during the Screening phase provided the assessments are completed at least 2 weeks apart.</p> <p>A high resolution computed tomography (HRCT) fibrosis score <math>&gt;</math> 20%</p> <p>FVC at Baseline (Visit 2) within 5% of the FVC measured at Screening</p> <p>Carbon monoxide diffusing capacity (DLCO) <math>\geq</math> 35% and <math>\leq</math> 80% of predicted value at Screening</p> <p>Abnormalities on High-Resolution CT consistent with parenchymal changes encountered in SSc: honeycombing or reticular changes with or without ground glass.</p>                                                                                                                                                                                                                                                                                                                                                                                                                                                                                                                                                                                                                                                                                                                                                                                                                                                                                                                                                                                                                                                                                                                                                                              |
| Exclusion criteria       | <p>Oxygen saturation (SpO<sub>2</sub>) <math>&lt;</math> 92% (room air [sea level] at rest) at Screening or Baseline</p> <p>Known diagnosis of obstructive lung disease as defined by forced expiratory volume (FEV<sub>1</sub>)/FVC ratio <math>&lt;</math> 0.7</p> <p>Diagnosis of pulmonary arterial hypertension (PAH) requiring treatment</p> <p>Known diagnosis of other significant respiratory disorders (e.g., asthma, tuberculosis, sarcoidosis, aspergillosis, chronic bronchitis, neoplastic disease, cystic fibrosis, etc.)</p> <p>Current clinical diagnosis of another inflammatory connective tissue disease (eg, systemic lupus erythematosus, rheumatoid arthritis, primary Sjogren's syndrome, etc.). Subjects having Sjogren's syndrome secondary to SSc are eligible</p> <p>Pregnant or lactating females</p> <p>History of a thromboembolic event (eg, deep vein thrombosis, thrombotic cerebrovascular or cardiovascular events)</p> <p>History or current diagnosis of peripheral neuropathy</p> <p>Use of concomitant medication(s) which could increase the risk for developing deep vein thrombosis, including sex steroid-based contraceptives (oral, injectable or implanted) and hormone replacement therapies, if use of a low-dose aspirin regimen is contraindicated.</p> <p>Additional concomitant medications which prolong the QT/QTc interval (measure of heart's electrical cycle) during the course of the study</p> <p>Use of any anti-coagulant or anti-thrombotic medications (other than low dose-aspirin [<math>\leq</math> 100 mg/day])</p> <p>Use of any cytotoxic/immunosuppressive agent (other than prednisone <math>\leq</math> 10 mg/day [mean dose] or equivalent), including but not limited to azathioprine, cyclophosphamide, methotrexate, mycophenolate and cyclosporine within 28 days (4 weeks) of Screening</p> <p>Use of any biologic agent within 84 days (12 weeks) or 5 half-lives of Screening. In the case of rituximab, use within 168 days (24 weeks) of Screening or no recovery of CD20-positive B lymphocytes if the last dose of rituximab has been more than 24 weeks prior to Screening</p> <p>Use of bosentan, ambrisentan, sildenafil, tadalafil and macitentan for PAH within 28 days (4 weeks) of Screening</p> <p>Use of medications (e.g., D-penicillamine, Potaba) with putative scleroderma disease-modifying properties within 4 weeks of Screening</p> <p>Use of melphalan within 52 weeks of Screening</p> <p>Use of any investigational drug within 4 weeks of Screening or 5 pharmacodynamic/pharmacokinetic half-lives if known (whichever is longer)</p> <p>Smoking of cigars, pipes or cigarettes within 24 weeks of Screening</p> |
| Interventions            | <p>Treatment: Pomalidomide 1 mg orally every day for 52 weeks</p>                                                                                                                                                                                                                                                                                                                                                                                                                                                                                                                                                                                                                                                                                                                                                                                                                                                                                                                                                                                                                                                                                                                                                                                                                                                                                                                                                                                                                                                                                                                                                                                                                                                                                                                                                                                                                                                                                                                                                                                                                                                                                                                                                                                                                                                                                                                                                                                                                                                                                                                                                                                                                                                            |

|                                                       |                                                                                                                                                                                                                                                                                                                                                                                                                                                                                                                                                                                                                                                                                                                                                                                                                                                                                                                                                                                                                                                                                                                                                                                                                                                                                                                                                                                                                                                                                                                                                                                                                                                                                                                                                                                                                                                                                                                                                                                                                                                                                                                                                                                                                                                                  |                            |                            |
|-------------------------------------------------------|------------------------------------------------------------------------------------------------------------------------------------------------------------------------------------------------------------------------------------------------------------------------------------------------------------------------------------------------------------------------------------------------------------------------------------------------------------------------------------------------------------------------------------------------------------------------------------------------------------------------------------------------------------------------------------------------------------------------------------------------------------------------------------------------------------------------------------------------------------------------------------------------------------------------------------------------------------------------------------------------------------------------------------------------------------------------------------------------------------------------------------------------------------------------------------------------------------------------------------------------------------------------------------------------------------------------------------------------------------------------------------------------------------------------------------------------------------------------------------------------------------------------------------------------------------------------------------------------------------------------------------------------------------------------------------------------------------------------------------------------------------------------------------------------------------------------------------------------------------------------------------------------------------------------------------------------------------------------------------------------------------------------------------------------------------------------------------------------------------------------------------------------------------------------------------------------------------------------------------------------------------------|----------------------------|----------------------------|
| Concomitant medications                               | Comparator: Placebo                                                                                                                                                                                                                                                                                                                                                                                                                                                                                                                                                                                                                                                                                                                                                                                                                                                                                                                                                                                                                                                                                                                                                                                                                                                                                                                                                                                                                                                                                                                                                                                                                                                                                                                                                                                                                                                                                                                                                                                                                                                                                                                                                                                                                                              |                            |                            |
| Primary outcomes                                      | Patients were permitted to continue other supportive medications at stable doses including proton pump inhibitors, angiotensin-converting enzyme inhibitors/angiotensin receptor blockers, and cough medications to treat SSc disease-related symptoms<br><br>Number of Participants with Treatment-Emergent Adverse Events (TEAEs)<br>Change from Baseline in Percent Predicted FVC at Week 52<br>Change from Baseline in the Modified Rodnan Skin Score (mRSS) at Week 52/Early Termination<br>Change From Baseline in University of California, Los Angeles, Scleroderma Clinical Trial Consortium Gastrointestinal Tract (UCLA SCTC GIT 2.0) Total Score at Week 52/Early Termination                                                                                                                                                                                                                                                                                                                                                                                                                                                                                                                                                                                                                                                                                                                                                                                                                                                                                                                                                                                                                                                                                                                                                                                                                                                                                                                                                                                                                                                                                                                                                                        |                            |                            |
| Secondary outcomes                                    | Change from Baseline in Percent Predicted Forced Vital Capacity Over Time<br>Change from Baseline in Modified Rodnan Skin Score Over Time<br>Change from Baseline in UCLA SCTC GIT 2.0 Total Score Over Time<br>Change from Baseline in UCLA SCTC GIT 2.0 Reflux Subscale Score Over Time<br>Change from Baseline in UCLA SCTC GIT 2.0 Distension/Bloating Subscale Score Over Time<br>Change from Baseline in UCLA SCTC GIT 2.0 Fecal Soilage Subscale Score Over Time<br>Change from Baseline in UCLA SCTC GIT 2.0 Diarrhoea Subscale Score Over Time<br>Change from Baseline in UCLA SCTC GIT 2.0 Social Functioning Subscale Score Over Time<br>Change from Baseline in UCLA SCTC GIT 2.0 Emotional Well Being Subscale Score Over Time<br>Change from Baseline in UCLA SCTC GIT 2.0 Constipation Subscale Score Over Time<br>Change from Baseline in Dyspnea Functional Impairment at Week 12<br>Change from Baseline in Dyspnea Functional Impairment at Week 24<br>Change from Baseline in Dyspnea Functional Impairment at Week 52/Early Termination<br>Change from Baseline in Dyspnea Functional Impairment at Week 64<br>Change from Baseline in Dyspnea Functional Impairment at Week 76<br>Change from Baseline in Dyspnea Functional Impairment at Week 156/Early Termination<br>Change from Baseline in Dyspnea Magnitude of Task at Week 12<br>Change from Baseline in Dyspnea Magnitude of Task at Week 24<br>Change from Baseline in Dyspnea Magnitude of Task at Week 52/Early Termination<br>Change from Baseline in Dyspnea Magnitude of Task at Week 64<br>Change from Baseline in Dyspnea Magnitude of Task at Week 76<br>Change from Baseline in Dyspnea Magnitude of Task at Week 156/Early Termination<br>Change from Baseline in Dyspnea Magnitude of Effort at Week 12<br>Change from Baseline in Dyspnea Magnitude of Effort at Week 24<br>Change from Baseline in Dyspnea Magnitude of Effort at Week 52/Early Termination<br>Change from Baseline in Dyspnea Magnitude of Effort at<br>Change from Baseline in Dyspnea Magnitude of Effort at Week 76<br>Change from Baseline in Dyspnea Magnitude of Effort at Week 156/Early Termination<br>Oxygen Saturation Over Time<br>Pharmacokinetic Parameters of Pomalidomide in Plasma |                            |                            |
| Patients available for the analysis                   | 10 POMA, 12 PBO                                                                                                                                                                                                                                                                                                                                                                                                                                                                                                                                                                                                                                                                                                                                                                                                                                                                                                                                                                                                                                                                                                                                                                                                                                                                                                                                                                                                                                                                                                                                                                                                                                                                                                                                                                                                                                                                                                                                                                                                                                                                                                                                                                                                                                                  |                            |                            |
| Outcomes included in the NMA                          | 1: Absolute change in "FVC % of predicted value" at 1 year from baseline<br>2: Number of patients with SAEs at the longest available follow-up<br>3: Number of patients discontinuing treatment for AEs<br>4: Deaths at the longest available follow-up                                                                                                                                                                                                                                                                                                                                                                                                                                                                                                                                                                                                                                                                                                                                                                                                                                                                                                                                                                                                                                                                                                                                                                                                                                                                                                                                                                                                                                                                                                                                                                                                                                                                                                                                                                                                                                                                                                                                                                                                          |                            |                            |
| Sponsor                                               | Celgene                                                                                                                                                                                                                                                                                                                                                                                                                                                                                                                                                                                                                                                                                                                                                                                                                                                                                                                                                                                                                                                                                                                                                                                                                                                                                                                                                                                                                                                                                                                                                                                                                                                                                                                                                                                                                                                                                                                                                                                                                                                                                                                                                                                                                                                          |                            |                            |
| Trial registration                                    | ClinicalTrials.gov, NCT01559129                                                                                                                                                                                                                                                                                                                                                                                                                                                                                                                                                                                                                                                                                                                                                                                                                                                                                                                                                                                                                                                                                                                                                                                                                                                                                                                                                                                                                                                                                                                                                                                                                                                                                                                                                                                                                                                                                                                                                                                                                                                                                                                                                                                                                                  |                            |                            |
| Summary statistics (outcome)                          | mean $\pm$ SD (1)<br>n (2-4)                                                                                                                                                                                                                                                                                                                                                                                                                                                                                                                                                                                                                                                                                                                                                                                                                                                                                                                                                                                                                                                                                                                                                                                                                                                                                                                                                                                                                                                                                                                                                                                                                                                                                                                                                                                                                                                                                                                                                                                                                                                                                                                                                                                                                                     |                            |                            |
| 1.Change FVC % predicted                              | Summary statistics<br>mean $\pm$ SD                                                                                                                                                                                                                                                                                                                                                                                                                                                                                                                                                                                                                                                                                                                                                                                                                                                                                                                                                                                                                                                                                                                                                                                                                                                                                                                                                                                                                                                                                                                                                                                                                                                                                                                                                                                                                                                                                                                                                                                                                                                                                                                                                                                                                              | POMA n=8<br>-5.2 $\pm$ 5.3 | PBO n=11<br>-2.8 $\pm$ 4.0 |
| 2. Number of patients discontinuing treatment for AEs | n                                                                                                                                                                                                                                                                                                                                                                                                                                                                                                                                                                                                                                                                                                                                                                                                                                                                                                                                                                                                                                                                                                                                                                                                                                                                                                                                                                                                                                                                                                                                                                                                                                                                                                                                                                                                                                                                                                                                                                                                                                                                                                                                                                                                                                                                | 4                          | 1                          |
| 3.Number of withdrawals                               | n                                                                                                                                                                                                                                                                                                                                                                                                                                                                                                                                                                                                                                                                                                                                                                                                                                                                                                                                                                                                                                                                                                                                                                                                                                                                                                                                                                                                                                                                                                                                                                                                                                                                                                                                                                                                                                                                                                                                                                                                                                                                                                                                                                                                                                                                | 4                          | 0                          |
| 4.Deaths                                              | n                                                                                                                                                                                                                                                                                                                                                                                                                                                                                                                                                                                                                                                                                                                                                                                                                                                                                                                                                                                                                                                                                                                                                                                                                                                                                                                                                                                                                                                                                                                                                                                                                                                                                                                                                                                                                                                                                                                                                                                                                                                                                                                                                                                                                                                                | 0                          | 0                          |
| Risk of Bias (RoB)                                    | Author's judgment                                                                                                                                                                                                                                                                                                                                                                                                                                                                                                                                                                                                                                                                                                                                                                                                                                                                                                                                                                                                                                                                                                                                                                                                                                                                                                                                                                                                                                                                                                                                                                                                                                                                                                                                                                                                                                                                                                                                                                                                                                                                                                                                                                                                                                                | Support for judgement      |                            |
| Random sequence generation                            | Unclear risk                                                                                                                                                                                                                                                                                                                                                                                                                                                                                                                                                                                                                                                                                                                                                                                                                                                                                                                                                                                                                                                                                                                                                                                                                                                                                                                                                                                                                                                                                                                                                                                                                                                                                                                                                                                                                                                                                                                                                                                                                                                                                                                                                                                                                                                     | Details not available      |                            |

|                                        |              |                                                                                                                                                      |
|----------------------------------------|--------------|------------------------------------------------------------------------------------------------------------------------------------------------------|
| Allocation concealment                 | Unclear risk | Details not available                                                                                                                                |
| Blinding of participants and personnel | Unclear risk | Details not available                                                                                                                                |
| Blinding of outcome assessment         | Unclear risk | Details not available                                                                                                                                |
| Incomplete outcome data                | High risk    | <i>"Of these 22 patients, 11 (50.0%) completed 52 weeks, with more PBO patients (7, 58.3%) completing treatment versus (4, 36.4%) POM patients."</i> |
| Selective reporting                    | High risk    | Protocol is available (Clinical Trials number: NCT01559129). Not all outcome of interest have been reported in the pre-specified way.                |
| Other bias                             | Low risk     |                                                                                                                                                      |
| Overall RoB                            | High risk    |                                                                                                                                                      |

#### 1.4 Reference list of RCTs included in the NMA

##### 1. SLS-I, 2006

Tashkin DP, Elashoff R, Clements PJ, et al. Cyclophosphamide versus placebo in scleroderma lung disease. *N Engl J Med*. 2006;354(25):2655–66.

##### 2. SLS-II, 2016

Tashkin DP, Roth MD, Clements PJ, et al. Mycophenolate Mofetil versus Oral Cyclophosphamide in Scleroderma-related Interstitial Lung Disease: Scleroderma Lung Study II (SLS-II), a double-blind, parallel group, randomised controlled trial. *Lancet Respir Med*. 2017;4(9):708–19.

##### 3. Domiciano DS, 2011

Domiciano DS, Bonfá E, Borges CT, et al. A long-term prospective randomized controlled study of non-specific interstitial pneumonia (NSIP) treatment in scleroderma. *Clin Rheumatol*. 2011;30(2):223–9.

##### 4. Hoyles RK, 2006

Hoyles RK, Ellis RW, Wellsbury J, et al. A multicenter, prospective, randomized, double-blind, placebo-controlled trial of corticosteroids and intravenous cyclophosphamide followed by oral azathioprine for the treatment of pulmonary fibrosis in scleroderma. *Arthritis Rheum*. 2006;54(12):3962–70.

##### 5. Naidu GSRSNK, 2020

Naidu GSRSNK, Sharma SK, Adarsh MB, Dhir V, Sinha A, Dhooria S, et al. Effect of mycophenolate mofetil (MMF) on systemic sclerosis-related interstitial lung disease with mildly impaired lung function: a double-blind, placebo-controlled, randomized trial. *Rheumatol Int* [Internet]. 2019;(0123456789). Available from: <https://doi.org/10.1007/s00296-019-04481-8>

##### 6. Sircar G, 2018

Sircar G, Goswami RP, Sircar D, Ghosh A, Ghosh P. Intravenous cyclophosphamide vs rituximab for the treatment of early diffuse scleroderma lung disease: Open label, randomized, controlled trial. *Rheumatol (United Kingdom)*. 2018;57(12):2106–13.

##### 7. SENSISCIS, 2019

Distler O, Highland KB, Gahlemann M, Azuma A, Fischer A, Mayes MD, et al. Nintedanib for systemic sclerosis-associated interstitial lung disease. *N Engl J Med*. 2019;380(26):2518–28.

##### 8. Acharya N, 2019

Acharya N, Sharma SK, Mishra D, Dhooria S, Dhir V, Jain S. Efficacy and safety of pirfenidone in systemic sclerosis-related interstitial lung disease-a randomised controlled trial. *Rheumatol Int*. 2020;40(5):703–710. doi:10.1007/s00296-020-04565-w

##### 9. Hsu VM, 2018

Hsu VM, Denton CP, Domsic RT, et al. Pomalidomide in patients with interstitial lung disease due to systemic sclerosis: A phase II, multicenter, randomized, double-blind, placebo-controlled, parallel-group study. *J Rheumatol*. 2018;45(3):405–10.

## 2. Studies excluded from the NMA

### 2.1 List of studies excluded from the NMA and reasons for exclusion

|    | Study                                    | Arms                                | Reason of exclusion                                 |
|----|------------------------------------------|-------------------------------------|-----------------------------------------------------|
| 1  | <a href="#">Abou-Raya A, 2013</a>        | Irbesartan, PBO                     | Data incomplete                                     |
| 2  | <a href="#">Allanore Y, 2018</a>         | LPA1-r antagonist, PBO              | Short follow-up                                     |
| 3  | <a href="#">Allanore Y, 2019</a>         | Romilkimab, PBO                     | Data incomplete                                     |
| 4  | <a href="#">ASSET, 2019</a>              | ABA, PBO                            | No definite diagnosis of SSc-ILD                    |
| 5  | <a href="#">ASSIST, 2011</a>             | HSCT, PBO                           | No definite diagnosis of SSc-ILD                    |
| 6  | <a href="#">Boonstra M, 2017</a>         | RTX, PBO                            | No definite diagnosis of SSc-ILD                    |
| 7  | <a href="#">Chakravarty EF, 2015</a>     | ABA, PBO                            | No definite diagnosis of SSc-ILD                    |
| 8  | <a href="#">Daoussis D, 2010</a>         | RTX                                 | Observational study                                 |
| 9  | <a href="#">Daoussis D, 2012</a>         | RTX                                 | Observational study                                 |
| 10 | <a href="#">Daoussis D, 2017</a>         | RTX                                 | Observational study                                 |
| 11 | <a href="#">Denton C, 2007</a>           | Anti-TGF $\beta$ 1 (CAT-192), PBO   | Data incomplete                                     |
| 12 | <a href="#">EDITA, 2019</a>              | Ambrisentan, PBO                    | No definite diagnosis of SSc-ILD                    |
| 13 | <a href="#">FaSScinate, 2016</a>         | Tocilizumab, PBO                    | No definite diagnosis of SSc-ILD                    |
| 14 | <a href="#">FocuSSced, 2020</a>          | Tocilizumab, PBO                    | No definite diagnosis of SSc-ILD                    |
| 15 | <a href="#">Gordon JK, 2018</a>          | Belimumab, PBO                      | No definite diagnosis of SSc-ILD                    |
| 16 | <a href="#">Gruber BL, 1991</a>          | Ketotifen, PBO                      | Data incomplete                                     |
| 17 | <a href="#">Guillevin L, 1982</a>        | FXIII, PBO                          | Data incomplete                                     |
| 18 | <a href="#">Guo M.-H. M.-H, 2008</a>     | Penicillamine, Yiqi-Huoxue medicine | No connections in the network                       |
| 19 | <a href="#">Henes J, 2020</a>            | HSCT, PBO                           | Observational study                                 |
| 20 | <a href="#">Herrick AL, 2017</a>         | CYC                                 | Observational study                                 |
| 21 | <a href="#">Hoffman-Vold AM, 2019</a>    | Fecal transplantation, PBO          | Data incomplete                                     |
| 22 | <a href="#">Khanna D, 2009</a>           | Relaxin, PBO                        | No definite diagnosis of SSc-ILD                    |
| 23 | <a href="#">Khanna D, 2019</a>           | Tofacitinib, PBO                    | Data incomplete                                     |
| 24 | <a href="#">Mehrabi S, 2019</a>          | NAC, PBO                            | Data incomplete                                     |
| 25 | <a href="#">Nadashkevich O, 2008</a>     | CYC, AZA                            | No definite diagnosis of SSc-ILD                    |
| 26 | <a href="#">NCT02283762</a>              | Riociguat, PBO                      | No definite diagnosis of SSc-ILD                    |
| 27 | <a href="#">NCT02465437</a>              | Lenabasum (JBT-101), PBO            | Short follow-up                                     |
| 28 | <a href="#">NCT02745145</a>              | Abituzumab, PBO                     | Outcomes expressed in a format not suitable for NMA |
| 29 | <a href="#">Pakas J, 2002</a>            | CYC+low, CYC+high dose steroids     | Observational study                                 |
| 30 | <a href="#">Panopoulos ST, 2013</a>      | CYC, MMF                            | Observational study                                 |
| 31 | <a href="#">Poormoghim H, 2013</a>       | CYC, AZA                            | Observational study                                 |
| 32 | <a href="#">Pope JE, 2001</a>            | Methotrexate, PBO                   | No definite diagnosis of SSc-ILD                    |
| 33 | <a href="#">Prey S, 2012</a>             | Imatinib, PBO                       | Data incomplete                                     |
| 34 | <a href="#">Quillinan NP, 2014</a>       | Hyperimmune caprine serum, PBO      | Data incomplete                                     |
| 35 | <a href="#">Schiopu E, 2016</a>          | Anti-CD19, PBO                      | Short follow-up                                     |
| 36 | <a href="#">Sclero XIII, 2019</a>        | FXIII, PBO                          | No definite diagnosis of SSc-ILD                    |
| 37 | <a href="#">Seibold JR, 2000</a>         | Relaxin, PBO                        | No definite diagnosis of SSc-ILD                    |
| 38 | <a href="#">Seibold JR, 2010</a>         | Bosentan, PBO                       | Outcomes expressed in a format not suitable for NMA |
| 39 | <a href="#">Su TIK, 2009</a>             | Rapamycin, methotrexate             | No definite diagnosis of SSc-ILD                    |
| 40 | <a href="#">Sullivan A, 2018</a>         | HSCT, CYC                           | Outcomes expressed in a format not suitable for NMA |
| 41 | <a href="#">van den Hoogen FHJ, 1996</a> | MTX, PBO                            | Data incomplete                                     |



## 2.2 Reference list of studies excluded from the NMA

### 1. Abou-Raya A, 2013

Abou-Raya A, Abou-Raya S, Helmii M. OP0038 Effects of Angiotensin II Receptor Blockade in Systemic Sclerosis: Randomized Controlled Trial. *Ann Rheum Dis* 2013; 72: A61.

### 2. Allanore Y, 2018

Allanore Y, Distler O, Jagerschmidt A, *et al.* Lysophosphatidic Acid Receptor 1 Antagonist SAR100842 for Patients with Diffuse Cutaneous Systemic Sclerosis: A Double-Blind, Randomized, Eight-Week Placebo-Controlled Study Followed by a Sixteen-Week Open-Label Extension Study. *Arthritis Rheumatol* 2018; 70:1634-1643. doi:10.1002/art.40547.

### 3. Allanore Y, 2019

Allanore Y, Denton C, Khanna D, *et al.* Efficacy and Safety of Romilkimab in Diffuse Cutaneous Systemic Sclerosis (dcSSc): A Randomized, Double-Blind, Placebo-Controlled, 24-week, Proof of Concept Study [abstract]. *Arthritis Rheumatol.* 2019; 71 (suppl 10).

### 4. ASSET, 2019

Khanna D, Spino C, Johnson S, *et al.* Abatacept in Early Diffuse Cutaneous Systemic Sclerosis: Results of a Phase II Investigator-Initiated, Multicenter, Double-Blind, Randomized, Placebo-Controlled Trial. *Arthritis Rheumatol.* 2020;72(1):125–36.

### 5. ASSIST, 2011

Burt RK, Shah SJ, Dill K, *et al.* Autologous non-myceloablative haemopoietic stem-cell transplantation compared with pulse cyclophosphamide once per month for systemic sclerosis (ASSIST): an open-label, randomised phase 2 trial. *Lancet [Internet]*. 2011;378(9790):498–506. Available from: [http://dx.doi.org/10.1016/S0140-6736\(11\)60982-3](http://dx.doi.org/10.1016/S0140-6736(11)60982-3)

### 6. Boonstra M, 2017

Boonstra M, Meijs J, Dorjée AL, *et al.* Rituximab in early systemic sclerosis. *RMD Open.* 2017;3(2).

### 7. Chakravarty EF, 2015

Chakravarty EF, Martyanov V, Fiorentino D, *et al.* Gene expression changes reflect clinical response in a placebo-controlled randomized trial of abatacept in patients with diffuse cutaneous systemic sclerosis. *Arthritis Res Ther [Internet]*. 2015;1–14. Available from: <http://dx.doi.org/10.1186/s13075-015-0669-3>

### 8. Daoussis D, 2010

Daoussis D, Liossis SN, Tsamandas AC, *et al.* Experience with rituximab in scleroderma: results from a 1-year, proof-of-principle study. *Rheumatology (Oxford)* 2010; 49:271-80. doi: 10.1093/rheumatology/kep093.

### 9. Daoussis D, 2012

Daoussis D, Liossis SN, Tsamandas AC, *et al.* Effect of long-term treatment with rituximab on pulmonary function and skin fibrosis in patients with diffuse systemic sclerosis. *Clin Exp Rheumatol* 2012;30(2 Suppl 71): S17-22.

### 10. Daoussis D, 2017

Daoussis D, Melissaropoulos K, Sakellaropoulos G, *et al.* A multicenter, open-label, comparative study of B-cell depletion therapy with Rituximab for systemic sclerosis-associated interstitial lung disease. *Semin Arthritis Rheum* 2017; 46:625-631. doi: 10.1016/j.semarthrit.2016.10.003.

### 11. Denton CP, 2007

Denton CP, Merkel PA, Furst DE, *et al.* Recombinant human anti-transforming growth factor beta1 antibody therapy in systemic sclerosis: a multicenter, randomized, placebo-controlled phase I/II trial of CAT-192. *Arthritis Rheum* 2007; 56:323-33.

### 12. EDITA, 2019

Pan Z, Marra AM, Benjamin N, *et al.* Early treatment with ambrisentan of mildly elevated mean pulmonary arterial pressure associated with systemic sclerosis: A randomized, controlled, double-blind, parallel group study (EDITA study). *Arthritis Res Ther.* 2019;21(1):1–15.

### 13. FaSScinate, 2016

Khanna D, Denton CP, Lin CJF, *et al.* Safety and efficacy of subcutaneous tocilizumab in systemic sclerosis: Results from the open-label period of a phase II randomised controlled trial (faSScinate). *Ann Rheum Dis.* 2018;77(2):212–20.

### 14. FocuSSced, 2020

NCT02453256. A Study of the Efficacy and Safety of Tocilizumab in Participants with Systemic Sclerosis (SSc) [focuSSced] [Internet]. 2020. Available from: <https://clinicaltrials.gov/ct2/show/NCT02453256>

### 15. Gordon JK, 2018

Gordon JK, Martyanov V, Franks JM, Bernstein EJ, *et al.* Belimumab for the Treatment of Early Diffuse Systemic Sclerosis: Results of a Randomized, Double-Blind, Placebo-Controlled, Pilot Trial. *Arthritis Rheumatol.* 2018;70(2):308–16.

### 16. Gruber BL, 1991

Gruber BL, Kaufman LD. A double-blind randomized controlled trial of ketotifen versus placebo in early diffuse scleroderma. *Arthritis Rheum* 1991; 34:362-6.

17. Guillevin L, 1982

Guillevin L, Chouvet B, Mery C, et al. [Treatment of generalized scleroderma with factor XIII. Study of 25 cases. *Rev Med Interne* 1982;3(3):273-7.

18. Guo MH, 2008

Guo MH, Tu WZ, Chen DD, et al. Therapeutic effects on systemic scleroderma of integrated therapy of Traditional Chinese Medicine with penicillamine. *J Clin Derm* 2008; 7

19. Henes J, 2019

Henes J, Oliveira MC, Labopin M, et al. Autologous stem cell transplantation for progressive systemic sclerosis: a prospective non-interventional study from the European Society for Blood and Marrow Transplantation Autoimmune Disease Working Party. *Haematologica* 2020;16. doi: 10.3324/haematol.2019.230128.

20. Herrick AL, 2019

Herrick AL, Pan X, Peytrignet S, et al. Treatment outcome in early diffuse cutaneous systemic sclerosis: The European Scleroderma Observational Study (ESOS). *Ann Rheum Dis*. 2017 Jul;76(7):1207-1218. doi: 10.1136/annrheumdis-2016-210503.

21. Hoffmann-Vold A, 2019

Hoffmann-Vold A, Fretheim H, Chung BK, et al. OP03207 Fecal microbiota transplantation in systemic sclerosis: a double-blind, placebo-controlled randomized pilot trial. *Ann Rheum Dis* 2019; 78:246-247.

22. Khanna D, 2009

Khanna D, Clements PJ, Furst DE, et al. Recombinant human relaxin in the treatment of systemic sclerosis with diffuse cutaneous involvement: A Randomized, Double-Blind, Placebo-Controlled Trial. *Arthritis Rheum*. 2009;60(4):1102–11.

23. Khanna D, 2019

Khanna D, Bush E, Nagaraja V, et al. Results of Phase I/II Investigator-Initiated, Double-Blind Randomized Placebo-Controlled Trial [abstract]. *Arthritis Rheumatol* 2019; 71 (suppl 10). <https://acrabstracts.org/abstract/tofacitinib-in-early-diffuse-cutaneous-systemic-sclerosis-results-of-phase-i-ii-investigator-initiated-double-blind-randomized-placebo-controlled-trial/>.

24. Mehrabi S, 2019

Mehrabi S, Moradi MM, Khodamoradi Z, et al. Effects of N-acetylcysteine on Pulmonary Functions in Patients with Systemic Sclerosis: A double blind, placebo controlled study. *Curr Rheumatol Rev* 2019;10:2174. doi:10.2174/1573397115666191212092608

25. Nadashkevich O, 2008

Nadashkevich O, Davis P, Fritzler M, Kovalenko W. A randomized unblinded trial of cyclophosphamide versus azathioprine in the treatment of systemic sclerosis. *Clin Rheumatol*. 2006;25(2):205–12.

26. NCT02283762, 2020

NCT02283762. Efficacy and Safety of Riociguat in Patients with Systemic Sclerosis [Internet]. 2020. Available from: <https://clinicaltrials.gov/ct2/show/NCT02283762>

27. NCT02465437

Safety, Tolerability, Efficacy, and Pharmacokinetics of JBT-101 in Systemic Sclerosis. Available at: <https://clinicaltrials.gov/ct2/show/study/NCT02465437>

28. NCT02745145

Abituzumab in SSc-ILD. Available at  
Available at: <https://clinicaltrials.gov/ct2/show/results/NCT02745145?term=NCT02745145&draw=2&rank=1>

29. Pakas J, 2002

Pakas I, Ioannidis JP, Malagari K, et al. Cyclophosphamide with low or high dose prednisolone for systemic sclerosis lung disease. *J Rheumatol* 2002; 29:298-304.

30. Panopoulos ST, 2013

Panopoulos ST, Bournia VK, Trakada G, et al. Mycophenolate versus cyclophosphamide for progressive interstitial lung disease associated with systemic sclerosis: a 2-year case control study. *Lung* 2013; 191: 483-9. doi: 10.1007/s00408-013-9499-8.

31. Poormoghim H, 2013

Poormoghim H, Rezaei N, Sheidaie Z, et al. Systemic sclerosis: comparison of efficacy of oral cyclophosphamide and azathioprine on skin score and pulmonary involvement-a retrospective study. *Rheumatol Int*. 2014 Dec;34(12):1691-9. doi: 10.1007/s00296-014-3026-y.

32. Pope JE, 2001

Pope JE, Bellamy N, Seibold JR, Baron M, Ellman M, Carette S, et al. A randomized, controlled trial of methotrexate versus placebo in early diffuse scleroderma. *Arthritis Rheum*. 2001;44(6):1351–8.

33. Prey S, 2012

Prey S, Ezzedine K, Doussau A, et al. Imatinib mesylate in scleroderma-associated diffuse skin fibrosis: a phase II multicentre randomized double-blinded controlled trial. *Br J Dermatol* 2012; 167: 1138-44. doi: 10.1111/j.1365-2133.2012.11186. x.

34. Quillinan NP, 2013

Quillinan NP, McIntosh D, Vernes J, et al. Treatment of diffuse systemic sclerosis with hyperimmune caprine serum (AIMSPRO): a phase II double-blind placebo-controlled trial. *Ann Rheum Dis* 2014; 73:56–61. doi:10.1136/annrheumdis-2013-203674

35. Schioppa E, 2016

Schioppa E, Chatterjee S, Hsu V, Flor A, et al. Safety and tolerability of an anti-CD19 monoclonal antibody, MEDI-551, in subjects with systemic sclerosis: a phase I, randomized, placebo-controlled, escalating single-dose study. *Arthritis Res Ther*. 2016 Jun 7;18(1):131. doi:10.1186/s13075-016-1021-2.

36. Sclero XIII, 2019

EudraCT 2014-001101-40. Sclero XIII: a phase II, double-blind, randomised, placebo-controlled study to investigate the pharmacokinetics, safety and efficacy of intravenous factor XIII treatment in patients with systemic sclerosis [Internet]. 2019. Available from: <https://www.clinicaltrialsregister.eu/ctr-search/search?query=Sclero+XIII>

37. Seibold JR, 2000

Seibold JR, Korn JH, Simms R, Clements PJ, Moreland LW, Mayes MD, et al. Recombinant human relaxin in the treatment of scleroderma. A randomized, double-blind, placebo-controlled trial. *Ann Intern Med*. 2000;132(11):871–9.

38. Seibold JR, 2010

Seibold JR, Denton CP, Furst DE, et al. Randomized, prospective, placebo-controlled trial of bosentan in interstitial lung disease secondary to systemic sclerosis. *Arthritis Rheum* 2010; 62:2101-8. doi: 10.1002/art.27466.

39. Su TIK, 2009

Su TIK, Khanna D, Furst DE, Danovitch G, Burger C, Maranian P, et al. Rapamycin versus methotrexate in early diffuse systemic sclerosis: Results from a randomized, single-blind pilot study. *Arthritis Rheum*. 2009;60(12):3821–30.

40. Sullivan KM, 2018

Sullivan KM, Goldmuntz EA, Keyes-Elstein L, et al. Myeloablative Autologous Stem-Cell Transplantation for Severe Scleroderma. *N Engl J Med* 2018; 378: 35-47.

41. van den Hoogen FH, 1996

van den Hoogen FH, Boerbooms AM, Swaak AJ, Rasker JJ, van Lier HJ, van de Putte LB. Comparison of methotrexate with placebo in the treatment of systemic sclerosis: a 24 week randomized double-blind trial, followed by a 24 week observational trial. *Br J Rheumatol* 1996; 35:364-72.

42. van Laar JM, 2014

van Laar JM, Farge D, Sont JK, et al. Autologous hematopoietic stem cell transplantation vs intravenous pulse cyclophosphamide in diffuse cutaneous systemic sclerosis: a randomized clinical trial. *JAMA*. 2014 Jun 25;311(24):2490-8. doi: 10.1001/jama.2014.6368.

### 3. Evaluation of Risk of Bias

#### 3.1 Summary of Risk of Bias

|                       | Random sequence generation (selection bias) | Allocation concealment (selection bias) | Blinding of participants and personnel (performance bias) | Blinding of outcome assessment (detection bias) | Incomplete outcome data (attrition bias) | Selective reporting (reporting bias) | Other bias |
|-----------------------|---------------------------------------------|-----------------------------------------|-----------------------------------------------------------|-------------------------------------------------|------------------------------------------|--------------------------------------|------------|
| 01.SLS-I, 2006        | +                                           | ?                                       | +                                                         | +                                               | +                                        | ?                                    | +          |
| 02.SLS-II, 2016       | +                                           | +                                       | +                                                         | +                                               | +                                        | +                                    | +          |
| 03.Domiciano DS, 2011 | ?                                           | -                                       | -                                                         | -                                               | -                                        | ?                                    | ?          |
| 04.Hoyles RK, 2006    | +                                           | +                                       | +                                                         | +                                               | -                                        | ?                                    | +          |
| 05.Naidu GSRSNK, 2020 | +                                           | +                                       | +                                                         | +                                               | -                                        | ?                                    | +          |
| 06.Sircar G, 2018     | +                                           | +                                       | -                                                         | -                                               | +                                        | -                                    | +          |
| 07.SENSICIS, 2019     | +                                           | +                                       | +                                                         | +                                               | +                                        | +                                    | +          |
| 08.Acharya N, 2019    | +                                           | +                                       | +                                                         | +                                               | +                                        | +                                    | +          |
| 09.Hsu VM, 2018       | ?                                           | ?                                       | ?                                                         | ?                                               | -                                        | -                                    | +          |

Review authors' judgements about each RoB item for each included RCT

#### 3.2 Graph of Risk of Bias

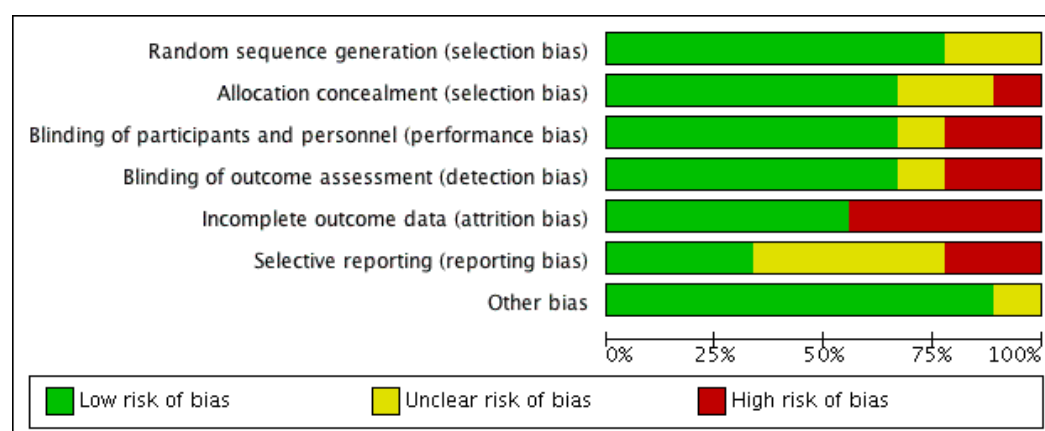

Review authors' judgements about each RoB item presented as percentages across all included RCTs

### 3.3 Overall Risk of Bias of RCTs included in the NMA

|   | <b>Study</b>                       | <b>Arms</b>                       | <b>Overall RoB</b> |
|---|------------------------------------|-----------------------------------|--------------------|
| 1 | <a href="#">SLS-I, 2006</a>        | Cyclophosphamide vs placebo       | Low risk           |
| 2 | <a href="#">SLS-II, 2016</a>       | Cyclophosphamide vs mycophenolate | Low risk           |
| 3 | <a href="#">Domiciano DS, 2011</a> | CYCPRED vs cyclophosphamide       | High risk          |
| 4 | <a href="#">Hoyles RK, 2006</a>    | CYCAZA vs placebo                 | High risk          |
| 5 | <a href="#">Naidu GSRSNK, 2020</a> | Mycophenolate vs placebo          | High risk          |
| 6 | <a href="#">Sircar G, 2018</a>     | Rituximab vs cyclophosphamide     | High risk          |
| 7 | <a href="#">SENSCIS, 2019</a>      | Nintedanib vs placebo             | Low risk           |
| 8 | <a href="#">Acharya N, 2019</a>    | Pirfenidone vs placebo            | Low risk           |
| 9 | <a href="#">Hsu VM, 2018</a>       | Pomalidomide vs placebo           | High risk          |

Overall RoB of each RCT was assessed as follows: 1) Low RoB: none of the seven domains was rated as high RoB and three or less were rated as unclear risk; 2) Moderate RoB: one was rated as high risk of bias or none was rated as high risk of bias but four or more were rated as unclear risk 3) High RoB: all other combinations.

#### 4. Network meta-analysis

##### 4.1 League table "change in FVC % of predicted"

|                        |                        |                        |                       |                       |                      |                       |                        |
|------------------------|------------------------|------------------------|-----------------------|-----------------------|----------------------|-----------------------|------------------------|
| <b>PBO</b>             | 0.08<br>(-0.22,0.38)   | -0.29<br>(-0.69,0.10)  | 0.23<br>(-0.74,1.20)  | 0.51<br>(-0.14,1.17)  | 1.00<br>(0.39,1.61)  | 0.32<br>(-0.36,1.00)  | -0.50<br>(-1.43,0.43)  |
| -0.08<br>(-0.38,0.22)  | <b>CYC</b>             | -0.38<br>(-0.71,-0.04) | 0.15<br>(-0.78,1.07)  | 0.43<br>(-0.29,1.15)  | 0.92<br>(0.39,1.45)  | 0.24<br>(-0.50,0.98)  | -0.58<br>(-1.56,0.39)  |
| 0.29<br>(-0.10,0.69)   | 0.38<br>(0.04,0.71)    | <b>MMF</b>             | 0.52<br>(-0.46,1.51)  | 0.81<br>(0.04,1.57)   | 1.29<br>(0.67,1.92)  | 0.61<br>(-0.17,1.39)  | -0.21<br>(-1.21,0.80)  |
| -0.23<br>(-1.20,0.74)  | -0.15<br>(-1.07,0.78)  | -0.52<br>(-1.51,0.46)  | <b>CYCPRED</b>        | 0.28<br>(-0.89,1.46)  | 0.77<br>(-0.30,1.84) | 0.09<br>(-1.10,1.27)  | -0.73<br>(-2.07,0.61)  |
| -0.51<br>(-1.17,0.14)  | -0.43<br>(-1.15,0.29)  | -0.81<br>(-1.57,-0.04) | -0.28<br>(-1.46,0.89) | <b>CYCAZA</b>         | 0.49<br>(-0.41,1.39) | -0.20<br>(-1.14,0.75) | -1.01<br>(-2.15,0.12)  |
| -1.00<br>(-1.61,-0.39) | -0.92<br>(-1.45,-0.39) | -1.29<br>(-1.92,-0.67) | -0.77<br>(-1.84,0.30) | -0.49<br>(-1.39,0.41) | <b>RTX</b>           | -0.68<br>(-1.60,0.23) | -1.50<br>(-2.61,-0.39) |
| -0.32<br>(-1.00,0.36)  | -0.24<br>(-0.98,0.50)  | -0.61<br>(-1.39,0.17)  | -0.09<br>(-1.27,1.10) | 0.20<br>(-0.75,1.14)  | 0.68<br>(-0.23,1.60) | <b>PFD</b>            | -0.82<br>(-1.97,0.33)  |
| 0.50<br>(-0.43,1.43)   | 0.58<br>(-0.39,1.56)   | 0.21<br>(-0.80,1.21)   | 0.73<br>(-0.61,2.07)  | 1.01<br>(-0.12,2.15)  | 1.50<br>(0.39,2.61)  | 0.82<br>(-0.33,1.97)  | <b>POMA</b>            |

##### 4.2 League table "change in DLCO % of predicted"

|                       |                       |                       |                      |                       |                       |
|-----------------------|-----------------------|-----------------------|----------------------|-----------------------|-----------------------|
| <b>PBO</b>            | -0.08<br>(-0.38,0.21) | 0.14<br>(-0.25,0.53)  | 0.90<br>(-0.44,2.24) | -0.01<br>(-0.66,0.63) | -0.05<br>(-0.21,0.12) |
| 0.08<br>(-0.21,0.38)  | <b>CYC</b>            | 0.22<br>(-0.11,0.55)  | 0.98<br>(-0.32,2.29) | 0.07<br>(-0.64,0.78)  | 0.04<br>(-0.30,0.37)  |
| -0.14<br>(-0.53,0.25) | -0.22<br>(-0.55,0.11) | <b>MMF</b>            | 0.76<br>(-0.59,2.11) | -0.15<br>(-0.90,0.60) | -0.19<br>(-0.61,0.23) |
| -0.90<br>(-2.24,0.44) | -0.98<br>(-2.29,0.32) | -0.76<br>(-2.11,0.59) | <b>CYCPRED</b>       | -0.91<br>(-2.40,0.57) | -0.95<br>(-2.30,0.40) |
| 0.01<br>(-0.63,0.66)  | -0.07<br>(-0.78,0.64) | 0.15<br>(-0.60,0.90)  | 0.91<br>(-0.57,2.40) | <b>CYCAZA</b>         | -0.04<br>(-0.70,0.63) |
| 0.05<br>(-0.12,0.21)  | -0.04<br>(-0.37,0.30) | 0.19<br>(-0.23,0.61)  | 0.95<br>(-0.40,2.30) | 0.04<br>(-0.63,0.70)  | <b>NTD</b>            |

##### 4.3 League table "number of patients with SAEs"

|                        |                        |                        |                        |                       |
|------------------------|------------------------|------------------------|------------------------|-----------------------|
| <b>PBO</b>             | 0.32<br>(-0.42, 1.06)  | 0.67<br>(-0.36, 1.70)  | 0.14<br>(-0.25, 0.53)  | 2.30<br>(-0.18, 4.78) |
| -0.32<br>(-1.06, 0.42) | <b>CYC</b>             | 0.35<br>(-0.40, 1.11)  | -0.17<br>(-1.01, 0.66) | 1.99<br>(-0.60, 4.57) |
| -0.67<br>(-1.70, 0.36) | -0.35<br>(-1.11, 0.40) | <b>MMF</b>             | -0.53<br>(-1.63, 0.57) | 1.63<br>(-1.05, 4.31) |
| -0.14<br>(-0.53, 0.25) | 0.17<br>(-0.66, 1.01)  | 0.53<br>(-0.57, 1.63)  | <b>NTD</b>             | 2.16<br>(-0.35, 4.67) |
| -2.30<br>(-4.78, 0.18) | -1.99<br>(-4.57, 0.60) | -1.63<br>(-4.31, 1.05) | -2.16<br>(-4.67, 0.35) | <b>POMA</b>           |

#### 4.4 League table "number of patients discontinuing treatment for AEs"

|                         |                       |                         |                        |                        |                        |                        |
|-------------------------|-----------------------|-------------------------|------------------------|------------------------|------------------------|------------------------|
| <b>PBO</b>              | 3.40<br>(0.19, 6.60)  | 2.39<br>(-0.66, 5.44)   | 1.67<br>(-1.44, 4.77)  | 0.70<br>(0.18, 1.21)   | 2.13<br>(-0.91, 5.18)  | 3.14<br>(0.02, 6.25)   |
| -3.40<br>(-6.60, -0.19) | <b>CYC</b>            | -1.01<br>(-2.00, -0.01) | -1.73<br>(-6.20, 2.73) | -2.70<br>(-5.95, 0.55) | -1.26<br>(-5.68, 3.16) | -0.26<br>(-4.73, 4.21) |
| -2.39<br>(-5.44, 0.66)  | 1.01<br>(0.01, 2.00)  | <b>MMF</b>              | -0.73<br>(-5.08, 3.63) | -1.69<br>(-4.78, 1.40) | -0.26<br>(-4.56, 4.05) | 0.74<br>(-3.61, 5.10)  |
| -1.67<br>(-4.77, 1.44)  | 1.73<br>(-2.73, 6.20) | 0.73<br>(-3.63, 5.08)   | <b>CYCAZA</b>          | -0.97<br>(-4.12, 2.18) | 0.47<br>(-3.88, 4.82)  | 1.47<br>(-2.93, 5.87)  |
| -0.70<br>(-1.21, -0.18) | 2.70<br>(-0.55, 5.95) | 1.69<br>(-1.40, 4.78)   | 0.97<br>(-2.18, 4.12)  | <b>NTD</b>             | 1.44<br>(-1.65, 4.52)  | 2.44<br>(-0.72, 5.60)  |
| -2.13<br>(-5.18, 0.91)  | 1.26<br>(-3.16, 5.68) | 0.26<br>(-4.05, 4.56)   | -0.47<br>(-4.82, 3.88) | -1.44<br>(-4.52, 1.65) | <b>PFD</b>             | 1.00<br>(-3.36, 5.36)  |
| -3.14<br>(-6.25, -0.02) | 0.26<br>(-4.21, 4.73) | -0.74<br>(-5.10, 3.61)  | -1.47<br>(-5.87, 2.93) | -2.44<br>(-5.60, 0.72) | -1.00<br>(-5.36, 3.36) | <b>POMA</b>            |

#### 4.5 League table "deaths"

|                        |                        |                        |                        |                        |                        |                        |                       |
|------------------------|------------------------|------------------------|------------------------|------------------------|------------------------|------------------------|-----------------------|
| <b>PBO</b>             | -0.02<br>(-1.20, 1.17) | -0.99<br>(-2.63, 0.65) | -0.02<br>(-3.18, 3.15) | -0.02<br>(-3.07, 3.04) | 0.11<br>(-0.80, 1.03)  | 0.00<br>(-3.98, 3.98)  | 0.30<br>(-3.72, 4.32) |
| 0.02<br>(-1.17, 1.20)  | <b>CYC</b>             | -0.97<br>(-2.11, 0.17) | 0.00<br>(-2.94, 2.94)  | 0.00<br>(-2.82, 2.82)  | 0.13<br>(-1.37, 1.62)  | 0.02<br>(-4.13, 4.16)  | 0.32<br>(-3.87, 4.51) |
| 0.99<br>(-0.65, 2.63)  | 0.97<br>(-0.17, 2.11)  | <b>MMF</b>             | 0.97<br>(-2.18, 4.12)  | 0.97<br>(-2.07, 4.01)  | 1.10<br>(-0.78, 2.98)  | 0.99<br>(-3.31, 5.29)  | 1.29<br>(-3.05, 5.63) |
| 0.02<br>(-3.15, 3.18)  | -0.00<br>(-2.94, 2.94) | -0.97<br>(-4.12, 2.18) | <b>CYCPRED</b>         | -0.00<br>(-4.07, 4.07) | 0.13<br>(-3.17, 3.43)  | 0.02<br>(-5.07, 5.10)  | 0.32<br>(-4.80, 5.44) |
| 0.02<br>(-3.04, 3.07)  | 0.00<br>(-2.82, 2.82)  | -0.97<br>(-4.01, 2.07) | 0.00<br>(-4.07, 4.07)  | <b>RTX</b>             | 0.13<br>(-3.06, 3.32)  | 0.02<br>(-5.00, 5.03)  | 0.32<br>(-4.73, 5.37) |
| -0.11<br>(-1.03, 0.80) | -0.13<br>(-1.62, 1.37) | -1.10<br>(-2.98, 0.78) | -0.13<br>(-3.43, 3.17) | -0.13<br>(-3.32, 3.06) | <b>NTD</b>             | -0.11<br>(-4.19, 3.97) | 0.19<br>(-3.93, 4.31) |
| 0.00<br>(-3.98, 3.98)  | -0.02<br>(-4.16, 4.13) | -0.99<br>(-5.29, 3.31) | -0.02<br>(-5.10, 5.07) | -0.02<br>(-5.03, 5.00) | 0.11<br>(-3.97, 4.19)  | <b>PFD</b>             | 0.30<br>(-5.35, 5.96) |
| -0.30<br>(-4.32, 3.72) | -0.32<br>(-4.51, 3.87) | -1.29<br>(-5.63, 3.05) | -0.32<br>(-5.44, 4.80) | -0.32<br>(-5.37, 4.73) | -0.19<br>(-4.31, 3.93) | -0.30<br>(-5.96, 5.35) | <b>POMA</b>           |

Values are SMDs (95% CI) or logORs (95% CI) in the column-defining treatment compared with the row-defining treatment. Values in blue cells are significant

## 5. Netweight

### 5.1 Netweight "change in FVC % predicted"

|                                 |                    | Direct comparisons in the network |      |       |       |       |      |       |       |
|---------------------------------|--------------------|-----------------------------------|------|-------|-------|-------|------|-------|-------|
|                                 |                    | 1vs2                              | 1vs3 | 1vs5  | 1vs7  | 1vs8  | 2vs3 | 2vs4  | 2vs6  |
| Network meta-analysis estimates | Mixed estimates    |                                   |      |       |       |       |      |       |       |
|                                 | 1vs2               | 74.9                              | 12.5 |       |       |       | 12.5 |       |       |
|                                 | 1vs3               | 40.0                              | 20.0 |       |       |       | 40.0 |       |       |
|                                 | 1vs5               |                                   |      | 100.0 |       |       |      |       |       |
|                                 | 1vs7               |                                   |      |       | 100.0 |       |      |       |       |
|                                 | 1vs8               |                                   |      |       |       | 100.0 |      |       |       |
|                                 | 2vs3               | 16.0                              | 16.0 |       |       |       | 68.0 |       |       |
|                                 | 2vs4               |                                   |      |       |       |       |      | 100.0 |       |
|                                 | 2vs6               |                                   |      |       |       |       |      |       | 100.0 |
|                                 | Indirect estimates |                                   |      |       |       |       |      |       |       |
|                                 | 1vs4               | 40.0                              | 6.7  |       |       |       | 6.7  | 46.7  |       |
|                                 | 1vs6               | 40.0                              | 6.7  |       |       |       | 6.7  |       | 46.7  |
|                                 | 2vs5               | 40.0                              | 6.7  | 46.7  |       |       | 6.7  |       |       |
|                                 | 2vs7               | 40.0                              | 6.7  |       | 46.7  |       | 6.7  |       |       |
|                                 | 2vs8               | 40.0                              | 6.7  |       |       | 46.7  | 6.7  |       |       |
|                                 | 3vs4               | 8.7                               | 8.7  |       |       |       | 37.0 | 45.7  |       |
|                                 | 3vs5               | 25.0                              | 12.5 | 37.5  |       |       | 25.0 |       |       |
|                                 | 3vs6               | 8.7                               | 8.7  |       |       |       | 37.0 |       | 45.7  |
|                                 | 3vs7               | 25.0                              | 12.5 |       | 37.5  |       | 25.0 |       |       |
|                                 | 3vs8               | 25.0                              | 12.5 |       |       | 37.5  | 25.0 |       |       |
|                                 | 4vs5               | 27.2                              | 4.6  | 31.8  |       |       | 4.6  | 31.8  |       |
|                                 | 4vs6               |                                   |      |       |       |       |      | 50.0  | 50.0  |
|                                 | 4vs7               | 27.2                              | 4.6  |       | 31.8  |       | 4.6  | 31.8  |       |
|                                 | 4vs8               | 27.2                              | 4.6  |       |       | 31.8  | 4.6  | 31.8  |       |
|                                 | 5vs6               | 27.2                              | 4.6  | 31.8  |       |       | 4.6  |       | 31.8  |
|                                 | 5vs7               |                                   |      | 50.0  | 50.0  |       |      |       |       |
|                                 | 5vs8               |                                   |      | 50.0  |       | 50.0  |      |       |       |
|                                 | 6vs7               | 27.2                              | 4.6  |       | 31.8  |       | 4.6  |       | 31.8  |
|                                 | 6vs8               | 27.2                              | 4.6  |       |       | 31.8  | 4.6  |       | 31.8  |
|                                 | 7vs8               |                                   |      |       | 50.0  | 50.0  |      |       |       |
| Entire network                  |                    | 22.9                              | 6.1  | 11.9  | 11.9  | 11.9  | 11.6 | 11.9  | 11.9  |
| Included studies                |                    | 1                                 | 1    | 1     | 1     | 1     | 1    | 1     | 1     |

1 PBO, 2 CYC, 3 MMF, 4 CYCPRED, 5 CYCAZA, 6 RTX, 7 PFD, 8 POMA

## 5.2 Netweight "change in DLCO % predicted"

|                                 |                    | Direct comparisons in the network |      |       |       |      |       |
|---------------------------------|--------------------|-----------------------------------|------|-------|-------|------|-------|
|                                 |                    | 1vs2                              | 1vs3 | 1vs5  | 1vs6  | 2vs3 | 2vs4  |
| Network meta-analysis estimates | Mixed estimates    |                                   |      |       |       |      |       |
|                                 | 1vs2               | 73.9                              | 13.0 | .     | .     | 13.0 | .     |
|                                 | 1vs3               | 39.3                              | 21.3 | .     | .     | 39.3 | .     |
|                                 | 1vs5               | .                                 | .    | 100.0 | 100.0 | .    | .     |
|                                 | 1vs6               | .                                 | .    | .     | 100.0 | .    | .     |
|                                 | 2vs3               | 16.8                              | 16.8 | .     | .     | 66.5 | .     |
|                                 | 2vs4               | .                                 | .    | .     | .     | .    | 100.0 |
|                                 | Indirect estimates |                                   |      |       |       |      |       |
|                                 | 1vs4               | 39.5                              | 7.0  | .     | .     | 7.0  | 46.5  |
|                                 | 2vs5               | 39.5                              | 7.0  | 46.5  | .     | 7.0  | .     |
|                                 | 2vs6               | 39.5                              | 7.0  | .     | 46.5  | 7.0  | .     |
|                                 | 3vs4               | 9.1                               | 9.2  | .     | .     | 36.3 | 45.4  |
|                                 | 3vs5               | 24.5                              | 13.3 | 37.8  | .     | 24.5 | .     |
|                                 | 3vs6               | 24.5                              | 13.3 | .     | 37.8  | 24.5 | .     |
|                                 | 4vs5               | 27.0                              | 4.8  | 31.7  | .     | 4.8  | 31.7  |
|                                 | 4vs6               | 27.0                              | 4.8  | .     | 31.8  | 4.8  | 31.7  |
|                                 | 5vs6               | .                                 | .    | 50.0  | 50.0  | .    | .     |
|                                 | Entire network     | 25.5                              | 8.1  | 17.1  | 17.1  | 15.2 | 17.1  |
|                                 | Included studies   | 1                                 | 1    | 1     | 1     | 1    | 1     |

1 PBO, 2 CYC, 3 MMF, 4 CYCPRED, 5 CYCAZA, 6 NTD

### 5.3 Netweight "number of patients with SAEs"

|                                 |                    | Direct comparisons in the network |     |       |       |      |
|---------------------------------|--------------------|-----------------------------------|-----|-------|-------|------|
|                                 |                    | 1-2                               | 1-3 | 1-4   | 1-5   | 2-3  |
| Network meta-analysis estimates | Mixed estimates    |                                   |     |       |       |      |
|                                 | 1-2                | 95.2                              | 2.4 | -     | -     | 2.4  |
|                                 | 1-3                | 45.1                              | 9.9 | -     | -     | 45.1 |
|                                 | 1-4                | -                                 | -   | 100.0 | -     | -    |
|                                 | 1-5                | -                                 | -   | -     | 100.0 | -    |
|                                 | 2-3                | 2.5                               | 2.5 | -     | -     | 95.0 |
|                                 | Indirect estimates |                                   |     |       |       |      |
|                                 | 2-4                | 47.6                              | 1.6 | 49.2  | -     | 1.6  |
|                                 | 2-5                | 47.6                              | 1.6 | -     | 49.2  | 1.6  |
|                                 | 3-4                | 30.0                              | 4.9 | 35.0  | -     | 30.0 |
|                                 | 3-5                | 30.0                              | 4.9 | -     | 35.0  | 30.0 |
|                                 | 4-5                | -                                 | -   | 50.0  | 50.0  | -    |
| Entire network                  |                    | 29.8                              | 2.8 | 23.4  | 23.4  | 20.6 |
| Included studies                |                    | 1                                 | 1   | 1     | 1     | 1    |

1 PBO, 2 CYC, 3 MMF, 4 NTD, 5 POMA

#### 5.4 Netweight "number of patients discontinuing treatment for AEs"

|                                 |                    |     | Direct comparisons in the network |      |       |      |      |       |
|---------------------------------|--------------------|-----|-----------------------------------|------|-------|------|------|-------|
|                                 |                    |     | 1-3                               | 1-4  | 1-5   | 1-6  | 1-7  | 2-3   |
| Network meta-analysis estimates | Mixed estimates    | 1-3 | 99.8                              |      | *     | *    | *    | *     |
|                                 |                    | 1-4 |                                   | 99.9 |       | *    | *    | *     |
|                                 |                    | 1-5 | *                                 |      | 100.0 |      | *    | *     |
|                                 |                    | 1-6 | *                                 | *    |       | 99.9 |      | *     |
|                                 |                    | 1-7 | *                                 | *    | *     |      | 99.9 | *     |
|                                 |                    | 2-3 | *                                 | *    | *     | *    |      | 100.0 |
|                                 | Indirect estimates | 1-2 | 49.9                              | *    | *     | *    | *    | 49.9  |
|                                 |                    | 2-4 | 33.2                              | 33.2 | *     | *    | *    | 33.2  |
|                                 |                    | 2-5 | 33.3                              | *    | 33.3  | *    | *    | 33.3  |
|                                 |                    | 2-6 | 33.2                              | *    | *     | 33.2 | *    | 33.2  |
|                                 |                    | 2-7 | 33.2                              | *    | *     | *    | 33.2 | 33.2  |
|                                 |                    | 3-4 | 49.9                              | 49.9 | *     | *    | *    | *     |
|                                 |                    | 3-5 | 49.9                              | *    | 49.9  | *    | *    | *     |
|                                 |                    | 3-6 | 49.9                              | *    | *     | 49.9 | *    | *     |
|                                 |                    | 3-7 | 49.9                              | *    | *     | *    | 49.9 | *     |
|                                 |                    | 4-5 | *                                 | 49.9 | 49.9  | *    | *    | *     |
|                                 |                    | 4-6 | *                                 | 49.9 | *     | 49.9 | *    | *     |
|                                 |                    | 4-7 | *                                 | 49.9 | *     | *    | 49.9 | *     |
|                                 |                    | 5-6 | *                                 | *    | 49.9  | 49.9 | 49.9 | *     |
|                                 |                    | 5-7 | *                                 | *    | 49.9  | *    | 49.9 | *     |
|                                 |                    | 6-7 | *                                 | *    | *     | 49.9 | 49.9 | *     |
| Entire network                  |                    |     | 23.0                              | 15.9 | 15.9  | 15.9 | 15.9 | 13.5  |
| Included studies                |                    |     | 1                                 | 1    | 1     | 1    | 1    | 1     |

1 PBO, 2 CYC, 3 MMF, 4 CYCAZA, 5 NTD, 6 PFD, 7 POMA

## 5.5 Netweight "Deaths"

|                                 |                    |     | Direct comparisons in the network |       |      |      |       |      |      |
|---------------------------------|--------------------|-----|-----------------------------------|-------|------|------|-------|------|------|
|                                 |                    |     | 1-2                               | 1-6   | 1-7  | 1-8  | 2-3   | 2-4  | 2-5  |
| Network meta-analysis estimates | Mixed estimates    | 1-2 | 99.9                              |       | *    | *    | *     | *    | *    |
|                                 |                    | 1-6 |                                   | 100.0 |      | *    | *     | *    | *    |
|                                 |                    | 1-7 | *                                 |       | 99.8 |      | *     | *    | *    |
|                                 |                    | 1-8 | *                                 | *     |      | 99.7 |       | *    | *    |
|                                 |                    | 2-3 | *                                 | *     | *    |      | 100.0 |      | *    |
|                                 |                    | 2-4 | *                                 | *     | *    | *    |       | 99.9 |      |
|                                 |                    | 2-5 | *                                 | *     | *    | *    | *     |      | 99.9 |
|                                 | Indirect estimates | 1-3 | 50.0                              | *     | *    | *    | 50.0  | *    | *    |
|                                 |                    | 1-4 | 49.9                              | *     | *    | *    | *     | 49.9 | *    |
|                                 |                    | 1-5 | 49.9                              |       | *    | *    | *     | *    | 49.9 |
|                                 |                    | 2-6 | 50.0                              | 50.0  | *    | *    | *     | *    | *    |
|                                 |                    | 2-7 | 49.9                              | *     | 49.9 | *    | *     | *    | *    |
|                                 |                    | 2-8 | 49.9                              | *     | *    | 49.9 | *     | *    | *    |
|                                 |                    | 3-4 | *                                 | *     | *    | *    | 49.9  | 49.9 | *    |
|                                 |                    | 3-5 | *                                 | *     | *    | *    | 49.9  | *    | 49.9 |
|                                 |                    | 3-6 | 33.3                              | 33.3  | *    | *    | 33.3  | *    | *    |
|                                 |                    | 3-7 | 33.2                              | *     | 33.2 | *    | 33.2  | *    | *    |
|                                 |                    | 3-8 | 33.2                              | *     | *    | 33.2 | 33.2  | *    | *    |
|                                 |                    | 4-5 | *                                 | *     | *    | *    | *     | 49.9 | 49.9 |
|                                 |                    | 4-6 | 33.3                              | 33.3  | *    | *    | *     | 33.3 | *    |
|                                 |                    | 4-7 | 33.2                              | *     | 33.2 | *    | *     | 33.2 | *    |
|                                 |                    | 4-8 | 33.2                              | *     | *    | 33.2 | *     | 33.2 | *    |
|                                 |                    | 5-6 | 33.3                              | 33.3  | *    | *    | *     | *    | 33.3 |
|                                 |                    | 5-7 | 33.2                              | *     | 33.2 | *    | *     | *    | 33.2 |
|                                 |                    | 5-8 | 33.2                              | *     | *    | 33.2 | *     | *    | 33.2 |
|                                 |                    | 6-7 | *                                 | 49.9  | 49.9 | *    | *     | *    | *    |
|                                 |                    | 6-8 | *                                 | 49.9  | *    | 49.9 | *     | *    | *    |
|                                 |                    | 7-8 | *                                 | *     | 49.9 | 49.9 | *     | *    | *    |
| Entire network                  |                    |     | 25.0                              | 12.5  | 12.5 | 12.5 | 12.5  | 12.5 | 12.5 |
| Included studies                |                    |     | 1                                 | 1     | 1    | 1    | 1     | 1    | 1    |

## 6. Evaluation of inconsistency

### 6.1 Change in “FVC % of predicted”

#### 6.1.1 Loop-specific heterogeneity estimate

| +-----+ |       |       |         |         |             |                   |
|---------|-------|-------|---------|---------|-------------|-------------------|
| Loop    | IF    | seIF  | z_value | p_value | CI_95       | Loop_Heterog_tau2 |
| +-----+ |       |       |         |         |             |                   |
| 1 2 3   | 0.764 | 0.412 | 1.852   | 0.064   | (0.00,1.57) | 0.000             |
| +-----+ |       |       |         |         |             |                   |

#### 6.1.2 Node-splitting approach

. network sidesplit PBO CYC

|            | Coef.     | Std. Err. | z     | P> z  | [95% Conf. Interval] |          |
|------------|-----------|-----------|-------|-------|----------------------|----------|
| direct     | .2066582  | .1707027  | 1.21  | 0.226 | -.1279131            | .5412294 |
| indirect   | -.5568957 | .4045283  | -1.38 | 0.169 | -1.349757            | .2359653 |
| difference | .7635538  | .4264319  | 1.79  | 0.073 | -.0722373            | 1.599345 |

. network sidesplit PBO MMF

|            | Coef.     | Std. Err. | z     | P> z  | [95% Conf. Interval] |           |
|------------|-----------|-----------|-------|-------|----------------------|-----------|
| direct     | -.7668896 | .3258537  | -2.35 | 0.019 | -1.405551            | -.1282282 |
| indirect   | -.0033079 | .2666092  | -0.01 | 0.990 | -.5258523            | .5192364  |
| difference | -.7635816 | .4160166  | -1.84 | 0.066 | -1.578959            | .0517958  |

. network sidesplit MMF CYC

|            | Coef.     | Std. Err. | z     | P> z  | [95% Conf. Interval] |          |
|------------|-----------|-----------|-------|-------|----------------------|----------|
| direct     | .2099653  | .193411   | 1.09  | 0.278 | -.1691133            | .5890438 |
| indirect   | .9735494  | .378602   | 2.57  | 0.010 | .2315031             | 1.715596 |
| difference | -.7635842 | .4310735  | -1.77 | 0.077 | -1.608473            | .0813043 |

#### 6.1.3 Design-by-treatment test

chi2(1)= 3.43  
 Prob>chi2 = 0.0640

## 6.2 Change in “DLCO % of predicted”

### 6.2.1 Loop-specific heterogeneity estimate

| +-----+-----+-----+-----+-----+-----+-----+-----+ |  |       |       |         |         |             |                   |
|---------------------------------------------------|--|-------|-------|---------|---------|-------------|-------------------|
| Loop                                              |  | IF    | seIF  | z_value | p_value | CI_95       | Loop_Heterog_tau2 |
| +-----+-----+-----+-----+-----+-----+-----+-----+ |  |       |       |         |         |             |                   |
| 1 2 3                                             |  | 0.049 | 0.403 | 0.120   | 0.904   | (0.00,0.84) | 0.000             |
| +-----+-----+-----+-----+-----+-----+-----+-----+ |  |       |       |         |         |             |                   |

### 6.2.2 Node-splitting approach

```
. network sidesplit PBO CYC
```

| -----+-----+-----+-----+-----+-----+----- |  |           |           |       |       |                      |
|-------------------------------------------|--|-----------|-----------|-------|-------|----------------------|
|                                           |  | Coef.     | Std. Err. | z     | P> z  | [95% Conf. Interval] |
| -----+-----+-----+-----+-----+-----+----- |  |           |           |       |       |                      |
| direct                                    |  | -.0758041 | .1691187  | -0.45 | 0.654 | -.4072707 .2556625   |
| indirect                                  |  | -.1243596 | .3685008  | -0.34 | 0.736 | -.8466078 .5978886   |
| difference                                |  | .0485555  | .4031122  | 0.12  | 0.904 | -.7415299 .8386408   |
| -----+-----+-----+-----+-----+-----+----- |  |           |           |       |       |                      |

```
. network sidesplit PBO MMF
```

| -----+-----+-----+-----+-----+-----+----- |  |          |           |       |       |                      |
|-------------------------------------------|--|----------|-----------|-------|-------|----------------------|
|                                           |  | Coef.    | Std. Err. | z     | P> z  | [95% Conf. Interval] |
| -----+-----+-----+-----+-----+-----+----- |  |          |           |       |       |                      |
| direct                                    |  | .109137  | .3138095  | 0.35  | 0.728 | -.5059184 .7241924   |
| indirect                                  |  | .1577    | .2633696  | 0.60  | 0.549 | -.358495 .673895     |
| difference                                |  | -.048563 | .4052704  | -0.12 | 0.905 | -.8428783 .7457523   |
| -----+-----+-----+-----+-----+-----+----- |  |          |           |       |       |                      |

```
. network sidesplit MMF CYC
```

| -----+-----+-----+-----+-----+-----+----- |  |           |           |       |       |                      |
|-------------------------------------------|--|-----------|-----------|-------|-------|----------------------|
|                                           |  | Coef.     | Std. Err. | z     | P> z  | [95% Conf. Interval] |
| -----+-----+-----+-----+-----+-----+----- |  |           |           |       |       |                      |
| direct                                    |  | -.2335031 | .2015741  | -1.16 | 0.247 | -.628581 .1615749    |
| indirect                                  |  | -.184942  | .4330839  | -0.43 | 0.669 | -1.033771 .6638869   |
| difference                                |  | -.0485611 | .5077231  | -0.10 | 0.924 | -1.04368 .9465579    |
| -----+-----+-----+-----+-----+-----+----- |  |           |           |       |       |                      |

### 6.2.3 Design-by-treatment test

```
chi2(1)= 0.01
Prob>chi2 = 0.9041
```

### 6.3 Number of patients with SAEs

#### 6.3.1 Loop-specific heterogeneity estimate

| -----+      |  |       |       |         |         |             |                   |
|-------------|--|-------|-------|---------|---------|-------------|-------------------|
| Loop        |  | IF    | seIF  | z_value | p_value | CI_95       | Loop_Heterog_tau2 |
| -----+      |  |       |       |         |         |             |                   |
| PBO CYC MMF |  | 0.803 | 1.758 | 0.457   | 0.648   | (0.00,4.25) | 0.000             |
| -----+      |  |       |       |         |         |             |                   |

#### 6.3.2 Node-splitting approach

```
. network sidesplit PBO CYC
```

| -----+     |  |           |           |       |       |                      |
|------------|--|-----------|-----------|-------|-------|----------------------|
|            |  | Coef.     | Std. Err. | z     | P> z  | [95% Conf. Interval] |
| -----+     |  |           |           |       |       |                      |
| direct     |  | .2782039  | .3866726  | 0.72  | 0.472 | -.4796606 1.036068   |
| indirect   |  | 1.080837  | 1.753839  | 0.62  | 0.538 | -2.356625 4.518299   |
| difference |  | -.8026333 | 1.792491  | -0.45 | 0.654 | -4.31585 2.710584    |
| -----+     |  |           |           |       |       |                      |

```
. network sidesplit PBO MMF
```

| -----+     |  |          |           |      |       |                      |
|------------|--|----------|-----------|------|-------|----------------------|
|            |  | Coef.    | Std. Err. | z    | P> z  | [95% Conf. Interval] |
| -----+     |  |          |           |      |       |                      |
| direct     |  | 1.394878 | 1.669424  | 0.84 | 0.403 | -1.877132 4.666888   |
| indirect   |  | .5921924 | .5590786  | 1.06 | 0.289 | -.5035814 1.687966   |
| difference |  | .8026857 | 1.760171  | 0.46 | 0.648 | -2.647186 4.252558   |
| -----+     |  |          |           |      |       |                      |

```
. network sidesplit MMF CYC
```

| -----+     |  |           |           |       |       |                      |
|------------|--|-----------|-----------|-------|-------|----------------------|
|            |  | Coef.     | Std. Err. | z     | P> z  | [95% Conf. Interval] |
| -----+     |  |           |           |       |       |                      |
| direct     |  | -.3139936 | .3957663  | -0.79 | 0.428 | -1.089681 .461694    |
| indirect   |  | -1.116665 | 2.071355  | -0.54 | 0.590 | -5.176445 2.943116   |
| difference |  | .8026711  | 2.127817  | 0.38  | 0.706 | -3.367773 4.973115   |
| -----+     |  |           |           |       |       |                      |

#### 6.3.3 Design-by-treatment test

```
chi2(1)= 0.21
Prob>chi2=0.6480
```

## 7. Quality ratings

### 7.1 GRADE "change in FVC % of predicted".

| Comparison                        | Direct evidence         |                                                                                                | Indirect evidence       |                                                                                                | NMA                    |                      |
|-----------------------------------|-------------------------|------------------------------------------------------------------------------------------------|-------------------------|------------------------------------------------------------------------------------------------|------------------------|----------------------|
|                                   | SMD<br>(95%CI)          | Quality of evidence<br>Reason for downgrading                                                  | SMD<br>(95%CI)          | Quality of evidence<br>Reason for downgrading                                                  | SMD<br>(95%CI)         | Quality of evidence  |
| Cyclophosphamide vs Placebo       | 0.20<br>(-0.12, 0.54)   | ⊕⊕OO <i>low</i><br>Imprecise estimate (-2)                                                     | -0.55<br>(-1.34, 0.23)  | ⊕OOO <i>very low</i><br>Study limitations (-1)<br>Imprecise estimate (-2)<br>Indirectness (-1) | 0.08<br>(-0.22, 0.38)  | ⊕⊕OO <i>low</i>      |
| Mycophenolate vs Placebo          | -0.76<br>(-1.40, -0.12) | ⊕⊕OO <i>low</i><br>Study limitations (-1)<br>Indirectness (-1)                                 | -0.003<br>(-0.52, 0.51) | ⊕⊕OO <i>low</i><br>Imprecise estimate (-2)                                                     | -0.29<br>(-0.69, 0.10) | ⊕⊕OO <i>low</i>      |
| CYCPRD vs Placebo                 | -                       | -                                                                                              | 0.23<br>(-0.74, 1.20)   | ⊕OOO <i>very low</i><br>Study limitations (-1)<br>Imprecise estimate (-2)                      | 0.23<br>(-0.74, 1.20)  | ⊕OOO <i>very low</i> |
| CYCAZA vs Placebo                 | 0.51<br>(-0.14, 1.17)   | ⊕OOO <i>very low</i><br>Study limitations (-1)<br>Imprecise estimate (-2)<br>Indirectness (-1) | Not estimable           | Not estimable                                                                                  | 0.51<br>(-0.14, 1.17)  | ⊕OOO <i>very low</i> |
| Rituximab vs Placebo              | -                       | -                                                                                              | 1.00<br>(0.39, 1.61)    | ⊕⊕OO <i>low</i><br>Study limitations (-1)<br>Indirectness (-1)                                 | 1.00<br>(0.39, 1.61)   | ⊕⊕OO <i>low</i>      |
| Pirfenidone vs Placebo            | 0.32<br>(-0.36, 1.00)   | ⊕OOO <i>very low</i><br>Imprecise estimate (-2)<br>Indirectness (-1)                           | Not estimable           | Not estimable                                                                                  | 0.32<br>(-0.36, 1.00)  | ⊕OOO <i>very low</i> |
| Pomalidomide vs Placebo           | -0.50<br>(-1.43, 0.43)  | ⊕OOO <i>very low</i><br>Study limitations (-1)<br>Imprecise estimate (-2)                      | Not estimable           | Not estimable                                                                                  | -0.50<br>(-1.43, 0.43) | ⊕OOO <i>very low</i> |
| Cyclophosphamide vs Mycophenolate | 0.20<br>(-0.16, 0.58)   | ⊕⊕OO <i>low</i><br>Imprecise estimate (-2)                                                     | 0.97<br>(0.23, 1.71)    | ⊕⊕OO <i>low</i><br>Study limitations (-1)<br>Indirectness (-1)                                 | 0.380<br>(0.04, 0.71)  | ⊕⊕OO <i>low</i>      |
| Cyclophosphamide vs CYCAZA        | -                       | -                                                                                              | -0.43<br>(-1.15, 0.29)  | ⊕OOO <i>very low</i><br>Study limitations (-1)<br>Imprecise estimate (-2)                      | -0.43<br>(-1.15, 0.29) | ⊕OOO <i>very low</i> |
| Cyclophosphamide vs CYCPRD        | -0.15<br>(-1.07, 0.78)  | ⊕OOO <i>very low</i><br>Study limitations (-1)                                                 | Not estimable           | Not estimable                                                                                  | -0.15<br>(-1.07, 0.78) | ⊕OOO <i>very low</i> |

|                                  |                        |                                                                | Imprecise estimate (-2) |                                                                                                |                        |                      |
|----------------------------------|------------------------|----------------------------------------------------------------|-------------------------|------------------------------------------------------------------------------------------------|------------------------|----------------------|
| Cyclophosphamide vs Rituximab    | -0.92<br>(-1.45,-0.39) | ⊕⊕○○ <i>low</i><br>Study limitations (-1)<br>Indirectness (-1) | Not estimable           | Not estimable                                                                                  | -0.92<br>(-1.45,-0.39) | ⊕⊕○○ <i>low</i>      |
| Cyclophosphamide vs Pirfenidone  | -                      | -                                                              | -0.24<br>(-0.98,0.50)   | ⊕○○○ <i>very low</i><br>Imprecise estimate (-2)<br>Indirectness (-1)                           | -0.24<br>(-0.98,0.50)  | ⊕○○○ <i>very low</i> |
| Cyclophosphamide vs Pomalidomide | -                      | -                                                              | 0.58<br>(-0.39,1.56)    | ⊕○○○ <i>very low</i><br>Study limitations (-1)<br>Imprecise estimate (-2)                      | 0.58<br>(-0.39,1.56)   | ⊕○○○ <i>very low</i> |
| Mycophenolate vs CYCAZA          | -                      | -                                                              | -0.81<br>(-1.57,-0.04)  | ⊕⊕○○ <i>low</i><br>Study limitations (-1)<br>Indirectness (-1)                                 | -0.81<br>(-1.57,-0.04) | ⊕⊕○○ <i>low</i>      |
| Mycophenolate vs CYCPRED         | -                      | -                                                              | -0.52<br>(-1.51,0.46)   | ⊕○○○ <i>very low</i><br>Study limitations (-1)<br>Imprecise estimate (-2)                      | -0.52<br>(-1.51,0.46)  | ⊕○○○ <i>very low</i> |
| Mycophenolate vs Rituximab       | -                      | -                                                              | -1.29<br>(-1.92,-0.67)  | ⊕⊕○○ <i>low</i><br>Study limitations (-1)<br>Indirectness (-1)                                 | -1.29<br>(-1.92,-0.67) | ⊕⊕○○ <i>low</i>      |
| Mycophenolate vs Pirfenidone     | -                      | -                                                              | -0.61<br>(-1.39,0.17)   | ⊕○○○ <i>very low</i><br>Study limitations (-1)<br>Imprecise estimate (-2)<br>Indirectness (-1) | -0.61<br>(-1.39,0.17)  | ⊕○○○ <i>very low</i> |
| Mycophenolate vs Pomalidomide    | -                      | -                                                              | 0.21<br>(-0.80,1.21)    | ⊕○○○ <i>very low</i><br>Study limitations (-1)<br>Imprecise estimate (-2)<br>Indirectness (-1) | 0.21<br>(-0.80,1.21)   | ⊕○○○ <i>very low</i> |
| CYCAZA vs CYCPRED                | -                      | -                                                              | 0.28<br>(-0.89,1.46)    | ⊕○○○ <i>very low</i><br>Study limitations (-1)<br>Imprecise estimate (-2)<br>Indirectness (-1) | 0.28<br>(-0.89,1.46)   | ⊕○○○ <i>very low</i> |
| CYCAZA vs Rituximab              | -                      | -                                                              | -0.49<br>(-1.39,0.41)   | ⊕○○○ <i>very low</i><br>Study limitations (-1)<br>Imprecise estimate (-2)<br>Indirectness (-1) | -0.49<br>(-1.39,0.41)  | ⊕○○○ <i>very low</i> |
| CYCAZA Pirfenidone               | -                      | -                                                              | 0.20<br>(-0.75,1.14)    | ⊕○○○ <i>very low</i><br>Study limitations (-1)<br>Imprecise estimate (-2)<br>Indirectness (-1) | 0.20<br>(-0.75,1.14)   | ⊕○○○ <i>very low</i> |

|                             |   |   |                       |                                                                                                |                       |                      |
|-----------------------------|---|---|-----------------------|------------------------------------------------------------------------------------------------|-----------------------|----------------------|
| CYCAZA vs Pomalidomide      | - | - | 1.01<br>(-0.12,2.15)  | ⊕○○○ <i>very low</i><br>Study limitations (-1)<br>Imprecise estimate (-2)                      | 1.01<br>(-0.12,2.15)  | ⊕○○○ <i>very low</i> |
| CYCPRED vs Rituximab        | - | - | -0.77<br>(-1.84,0.30) | ⊕○○○ <i>very low</i><br>Study limitations (-1)<br>Imprecise estimate (-2)                      | -0.77<br>(-1.84,0.30) | ⊕○○○ <i>very low</i> |
| CYCPRED vs Pirfenidone      | - | - | -0.09<br>(-1.27,1.10) | ⊕○○○ <i>very low</i><br>Study limitations (-1)<br>Imprecise estimate (-2)                      | -0.09<br>(-1.27,1.10) | ⊕○○○ <i>very low</i> |
| CYCPRED vs Pomalidomide     | - | - | 0.73<br>(-0.61,2.07)  | ⊕○○○ <i>very low</i><br>Study limitations (-1)<br>Imprecise estimate (-2)                      | 0.73<br>(-0.61,2.07)  | ⊕○○○ <i>very low</i> |
| Rituximab vs Pirfenidone    | - | - | 0.68<br>(-0.23,1.60)  | ⊕○○○ <i>very low</i><br>Study limitations (-1)<br>Imprecise estimate (2)<br>Indirectness (-1)  | 0.68<br>(-0.23,1.60)  | ⊕○○○ <i>very low</i> |
| Rituximab vs Pomalidomide   | - | - | 1.50<br>(0.39,2.61)   | ⊕⊕○○ <i>low</i><br>Study limitations (-1)<br>Indirectness (-1)                                 | 1.50<br>(0.39,2.61)   | ⊕⊕○○ <i>low</i>      |
| Pirfenidone vs Pomalidomide | - | - | 0.82<br>(-0.33,1.97)  | ⊕○○○ <i>very low</i><br>Study limitations (-1)<br>Imprecise estimate (-2)<br>Indirectness (-1) | 0.82<br>(-0.33,1.97)  | ⊕○○○ <i>very low</i> |

## 7.2 GRADE "change in DLCO % of predicted".

| Comparison                        | Direct evidence        |                                                                                                | Indirect evidence      |                                                                                                | NMA                    |                                            |
|-----------------------------------|------------------------|------------------------------------------------------------------------------------------------|------------------------|------------------------------------------------------------------------------------------------|------------------------|--------------------------------------------|
|                                   | SMD<br>(95%CI)         | Quality of evidence<br>Reason for downgrading                                                  | SMD<br>(95%CI)         | Quality of evidence<br>Reason for downgrading                                                  | SMD<br>(95%CI)         | Quality of evidence                        |
| Cyclophosphamide vs Placebo       | -0.07<br>(-0.40, 0.25) | ⊕⊕⊕⊕ <i>low</i><br>Imprecise estimate (-2)                                                     | -0.12<br>(-0.84, 0.59) | ⊕⊕⊕⊕ <i>very low</i><br>Study limitations (-1)<br>Imprecise estimate (-2)<br>Indirectness (-1) | -0.08<br>(-0.38,0.21)  | ⊕⊕⊕⊕ <i>low</i>                            |
| Mycophenolate vs Placebo          | 0.10<br>(-0.50, 0.72)  | ⊕⊕⊕⊕ <i>very low</i><br>Study limitations (-1)<br>Imprecise estimate (-2)<br>Indirectness (-1) | 0.15<br>(-0.35, 0.67)  | ⊕⊕⊕⊕ <i>low</i><br>Imprecise estimate (-2)                                                     | 0.14<br>(-0.25,0.53)   | ⊕⊕⊕⊕ <i>low</i>                            |
| CYCPRED vs Placebo                | -                      | -                                                                                              | 0.90<br>(-0.44,2.24)   | ⊕⊕⊕⊕ <i>very low</i><br>Study limitations (-1)<br>Imprecise estimate (-2)                      | 0.90<br>(-0.44,2.24)   | ⊕⊕⊕⊕ <i>very low</i>                       |
| CYCAZA vs Placebo                 | -0.01<br>(-0.66, 0.63) | ⊕⊕⊕⊕ <i>very low</i><br>Study limitations (-1)<br>Imprecise estimate (-2)<br>Indirectness (-1) | Not estimable          | Not estimable                                                                                  | -0.01<br>(-0.66,0.63)  | ⊕⊕⊕⊕ <i>very low</i>                       |
| Nintedanib vs Placebo             | -0.05<br>(-0.21,0.12)  | ⊕⊕⊕⊕ <i>low</i><br>Imprecise estimate (-2)                                                     | Not estimable          | Not estimable                                                                                  | -0.05<br>(-0.21,0.12)  | ⊕⊕⊕⊕ <i>low</i><br>Imprecise estimate (-2) |
| Cyclophosphamide vs Mycophenolate | -0.22<br>(-0.55,0.11)  | ⊕⊕⊕⊕ <i>low</i><br>Imprecise estimate (-2)                                                     | -0.18<br>(-1.03, 0.66) | ⊕⊕⊕⊕ <i>very low</i><br>Study limitations (-1)<br>Imprecise estimate (-2)<br>Indirectness (-1) | -0.22<br>(-0.55,0.11)  | ⊕⊕⊕⊕ <i>low</i>                            |
| Cyclophosphamide vs CYCAZA        | -                      | -                                                                                              | -0.07<br>(-0.78,0.64)  | ⊕⊕⊕⊕ <i>very low</i><br>Study limitations (-1)<br>Imprecise estimate (-2)                      | -0.07<br>(-0.78, 0.64) | ⊕⊕⊕⊕ <i>very low</i>                       |
| Cyclophosphamide vs CYCPRED       | -0.98<br>(-2.29,0.32)  | ⊕⊕⊕⊕ <i>very low</i><br>Study limitations (-1)<br>Imprecise estimate (-2)                      | Not estimable          | Not estimable                                                                                  | -0.98<br>(-2.29,0.32)  | ⊕⊕⊕⊕ <i>very low</i>                       |
| Cyclophosphamide vs Nintedanib    | -                      | -                                                                                              | -0.04<br>(-0.37,0.30)  | ⊕⊕⊕⊕ <i>low</i><br>Imprecise estimate (-2)                                                     | -0.04<br>(-0.37,0.30)  | ⊕⊕⊕⊕ <i>low</i><br>Imprecise estimate (-2) |
| Mycophenolate vs CYCAZA           | -                      | -                                                                                              | 0.15<br>(-0.60,0.90)   | ⊕⊕⊕⊕ <i>very low</i><br>Study limitations (-1)<br>Imprecise estimate (-2)<br>Indirectness (-1) | 0.15<br>(-0.60,0.90)   | ⊕⊕⊕⊕ <i>very low</i>                       |
| Mycophenolate vs CYCPRED          | -                      | -                                                                                              | -0.76                  | ⊕⊕⊕⊕ <i>very low</i>                                                                           | -0.76                  | ⊕⊕⊕⊕ <i>very low</i>                       |

|                             |   |   |                       |                                                                                                |                       |                      |
|-----------------------------|---|---|-----------------------|------------------------------------------------------------------------------------------------|-----------------------|----------------------|
|                             |   |   | (-2.11,0.59)          | Study limitations (-1)<br>Imprecise estimate (-2)                                              | (-2.11,0.59)          |                      |
| Mycophenolate vs Nintedanib | - | - | 0.19<br>(-0.23,0.61)  | ⊕○○○ <i>very low</i><br>Study limitations (-1)<br>Imprecise estimate (-2)<br>Indirectness (-1) | 0.19<br>(-0.23,0.61)  | ⊕○○○ <i>very low</i> |
| CYCAZA vs CYCPRED           | - | - | -0.91<br>(-2.40,0.57) | ⊕○○○ <i>very low</i><br>Study limitations (-1)<br>Imprecise estimate (-2)<br>Indirectness (-1) | -0.91<br>(-2.40,0.57) | ⊕○○○ <i>very low</i> |
| CYCAZA vs Nintedanib        | - | - | 0.04<br>(-0.63,0.70)  | ⊕○○○ <i>very low</i><br>Study limitations (-1)<br>Imprecise estimate (-2)                      | 0.87<br>(0.20, 1.53)  | ⊕○○○ <i>very low</i> |
| CYCPRED vs Nintedanib       | - | - | 0.95<br>(-0.40,2.30)  | ⊕○○○ <i>very low</i><br>Study limitations (-1)<br>Imprecise estimate (-2)                      | 0.95<br>(-0.40,2.30)  | ⊕○○○ <i>very low</i> |

## 7.3 GRADE "number of patients with SAEs"

| Comparison                        | Direct evidence        |                                                                                                | Indirect evidence      |                                                                                                | NMA                    |                      |
|-----------------------------------|------------------------|------------------------------------------------------------------------------------------------|------------------------|------------------------------------------------------------------------------------------------|------------------------|----------------------|
|                                   | logOR<br>(95%CI)       | Quality of evidence<br>Reason for downgrading                                                  | logOR<br>(95%CI)       | Quality of evidence<br>Reason for downgrading                                                  | logOR<br>(95%CI)       | Quality of evidence  |
| Cyclophosphamide vs Placebo       | 0.27<br>(-0.47, 1.03)  | ⊕⊕⊕⊕ <i>low</i><br>Imprecise estimate (-2)                                                     | 1.08<br>(-2.35, 4.51)  | ⊕⊕⊕⊕ <i>very low</i><br>Study limitations (-1)<br>Imprecise estimate (-2)<br>Indirectness (-1) | 0.32<br>(-0.42, 1.06)  | ⊕⊕⊕⊕ <i>low</i>      |
| Mycophenolate vs Placebo          | 1.39<br>(-1.87, 4.66)  | ⊕⊕⊕⊕ <i>very low</i><br>Study limitations (-1)<br>Imprecise estimate (-2)<br>Indirectness (-1) | 0.59<br>(-0.50, 1.68)  | ⊕⊕⊕⊕ <i>low</i><br>Imprecise estimate (-2)                                                     | 0.67<br>(-0.36, 1.70)  | ⊕⊕⊕⊕ <i>low</i>      |
| Nintedanib vs Placebo             | 0.14<br>(-0.25, 0.53)  | ⊕⊕⊕⊕ <i>low</i><br>Imprecise estimate (-2)                                                     | Not estimable          | Not estimable                                                                                  | 0.14<br>(-0.25, 0.53)  | ⊕⊕⊕⊕ <i>low</i>      |
| Pomalidomide vs Placebo           | 2.30<br>(-0.18, 4.78)  | ⊕⊕⊕⊕ <i>very low</i><br>Study limitations (-1)<br>Imprecise estimate (-2)                      | Not estimable          | Not estimable                                                                                  | 2.30<br>(-0.18, 4.78)  | ⊕⊕⊕⊕ <i>very low</i> |
| Cyclophosphamide vs Mycophenolate | -0.31<br>(-1.08, 0.46) | ⊕⊕⊕⊕ <i>low</i><br>Imprecise estimate (-2)                                                     | -1.11<br>(-5.17, 2.94) | ⊕⊕⊕⊕ <i>very low</i><br>Study limitations (-1)<br>Imprecise estimate (-2)<br>Indirectness (-1) | -0.35<br>(-1.11, 0.40) | ⊕⊕⊕⊕ <i>low</i>      |
| Cyclophosphamide vs Nintedanib    | -                      | -                                                                                              | 0.17<br>(-0.66, 1.01)  | ⊕⊕⊕⊕ <i>very low</i><br>Study limitations (-1)<br>Imprecise estimate (-2)                      | 0.17<br>(-0.66, 1.01)  | ⊕⊕⊕⊕ <i>very low</i> |
| Cyclophosphamide vs Pomalidomide  | -                      | -                                                                                              | -1.99<br>(-4.57, 0.60) | ⊕⊕⊕⊕ <i>very low</i><br>Study limitations (-1)<br>Imprecise estimate (-2)                      | -1.99<br>(-4.57, 0.60) | ⊕⊕⊕⊕ <i>very low</i> |
| Mycophenolate vs Nintedanib       |                        |                                                                                                | 0.53<br>(-0.57, 1.63)  | ⊕⊕⊕⊕ <i>very low</i><br>Study limitations (-1)<br>Imprecise estimate (-2)<br>Indirectness (-1) | 0.53<br>(-0.57, 1.63)  | ⊕⊕⊕⊕ <i>very low</i> |
| Mycophenolate vs Pomalidomide     | -                      | -                                                                                              | -1.63<br>(-4.31, 1.05) | ⊕⊕⊕⊕ <i>very low</i><br>Study limitations (-1)<br>Imprecise estimate (-2)<br>Indirectness (-1) | -1.63<br>(-4.31, 1.05) | ⊕⊕⊕⊕ <i>very low</i> |
| Nintedanib vs Pomalidomide        | -                      | -                                                                                              | -2.16<br>(-4.67, 0.35) | ⊕⊕⊕⊕ <i>very low</i><br>Study limitations (-1)<br>Imprecise estimate (-2)                      | -2.16<br>(-4.67, 0.35) | ⊕⊕⊕⊕ <i>very low</i> |

## 7.4 GRADE "number of patients discontinuing treatment for AEs"

| Comparison                        | Direct evidence       |                                                                                                | Indirect evidence     |                                                                                                | NMA                   |                      |
|-----------------------------------|-----------------------|------------------------------------------------------------------------------------------------|-----------------------|------------------------------------------------------------------------------------------------|-----------------------|----------------------|
|                                   | logOR<br>(95%CI)      | Quality of evidence<br>Reason for downgrading                                                  | logOR<br>(95%CI)      | Quality of evidence<br>Reason for downgrading                                                  | logOR<br>(95%CI)      | Quality of evidence  |
| Cyclophosphamide vs Placebo       | -                     | -                                                                                              | 3.40<br>(0.19, 6.60)  | ⊕○○○ <i>very low</i><br>Study limitations (-1)<br>Imprecise estimate (-1)<br>Indirectness (-1) | 3.40<br>(0.19, 6.60)  | ⊕○○○ <i>very low</i> |
| Mycophenolate vs Placebo          | 2.39<br>(-0.66, 5.44) | ⊕○○○ <i>very low</i><br>Study limitations (-1)<br>Imprecise estimate (-2)<br>Indirectness (-1) | Not estimable         | Not estimable                                                                                  | 2.39<br>(-0.66, 5.44) | ⊕○○○ <i>very low</i> |
| CYCAZA vs Placebo                 | 1.67<br>(-1.44, 4.77) | ⊕○○○ <i>very low</i><br>Study limitations (-1)<br>Imprecise estimate (-2)<br>Indirectness (-1) | Not estimable         | Not estimable                                                                                  | 1.67<br>(-1.44, 4.77) | ⊕○○○ <i>very low</i> |
| Nintedanib vs Placebo             | 0.70<br>(0.18, 1.21)  | ⊕⊕⊕⊕ <i>high</i>                                                                               | Not estimable         | Not estimable                                                                                  | 0.70<br>(0.18, 1.21)  | ⊕⊕⊕⊕ <i>high</i>     |
| Pirfenidone vs Placebo            | 2.13<br>(-0.91, 5.18) | ⊕○○○ <i>very low</i><br>Imprecise estimate (-2)<br>Indirectness (-1)                           | Not estimable         | Not estimable                                                                                  | 2.13<br>(-0.91, 5.18) | ⊕○○○ <i>very low</i> |
| Pomalidomide vs Placebo           | 3.14<br>(0.02, 6.25)  | ⊕○○○ <i>very low</i><br>Study limitations (-1)<br>Imprecise estimate (-2)                      | Not estimable         | Not estimable                                                                                  | 3.14<br>(0.02, 6.25)  | ⊕○○○ <i>very low</i> |
| Cyclophosphamide vs Mycophenolate | 1.01<br>(0.01, 2.00)  | ⊕⊕⊕⊕ <i>high</i>                                                                               | Not estimable         | Not estimable                                                                                  | 1.01<br>(0.01, 2.00)  | ⊕⊕⊕⊕ <i>high</i>     |
| Cyclophosphamide vs CYCAZA        | -                     | --                                                                                             | 1.73<br>(-2.73, 6.20) | ⊕○○○ <i>very low</i><br>Study limitations (-1)<br>Imprecise estimate (-2)<br>Indirectness (-1) | 1.73<br>(-2.73, 6.20) | ⊕○○○ <i>very low</i> |
| Cyclophosphamide vs Nintedanib    |                       |                                                                                                | 2.70<br>(-0.55, 5.95) | ⊕○○○ <i>very low</i><br>Study limitations (-1)<br>Imprecise estimate (-2)<br>Indirectness (-1) | 2.70<br>(-0.55, 5.95) | ⊕○○○ <i>very low</i> |
| Cyclophosphamide vs Pirfenidone   | -                     | -                                                                                              | 1.26<br>(-3.16, 5.68) | ⊕○○○ <i>very low</i><br>Study limitations (-1)<br>Imprecise estimate (-2)<br>Indirectness (-1) | 1.26<br>(-3.16, 5.68) | ⊕○○○ <i>very low</i> |

|                                  |   |   |                        |                                                                                                |                        |                      |
|----------------------------------|---|---|------------------------|------------------------------------------------------------------------------------------------|------------------------|----------------------|
| Cyclophosphamide vs Pomalidomide | - | - | 0.26<br>(-4.21, 4.73)  | ⊕○○○ <i>very low</i><br>Study limitations (-1)<br>Imprecise estimate (-2)<br>Indirectness (-1) | 0.26<br>(-4.21, 4.73)  | ⊕○○○ <i>very low</i> |
| Mycophenolate vs CYCAZA          | - | - | 0.73<br>(-3.63, 5.08)  | ⊕○○○ <i>very low</i><br>Study limitations (-1)<br>Imprecise estimate (-2)<br>Indirectness (-1) | 0.73<br>(-3.63, 5.08)  | ⊕○○○ <i>very low</i> |
| Mycophenolate vs Nintedanib      | - | - | 1.69<br>(-1.40, 4.78)  | ⊕○○○ <i>very low</i><br>Study limitations (-1)<br>Imprecise estimate (-2)<br>Indirectness (-1) | 1.69<br>(-1.40, 4.78)  | ⊕○○○ <i>very low</i> |
| Mycophenolate vs Pirfenidone     | - | - | 0.26<br>(-4.05, 4.56)  | ⊕○○○ <i>very low</i><br>Study limitations (-1)<br>Imprecise estimate (-2)<br>Indirectness (-1) | 0.26<br>(-4.05, 4.56)  | ⊕○○○ <i>very low</i> |
| Mycophenolate vs Pomalidomide    | - | - | -0.74<br>(-5.10, 3.61) | ⊕○○○ <i>very low</i><br>Study limitations (-1)<br>Imprecise estimate (-2)<br>Indirectness (-1) | -0.74<br>(-5.10, 3.61) | ⊕○○○ <i>very low</i> |
| CYCAZA vs Nintedanib             | - | - | 0.97<br>(-2.18, 4.12)  | ⊕○○○ <i>very low</i><br>Study limitations (-1)<br>Imprecise estimate (-2)                      | 0.97<br>(-2.18, 4.12)  | ⊕○○○ <i>very low</i> |
| CYCAZA Pirfenidone               | - | - | -0.47<br>(-4.82, 3.88) | ⊕○○○ <i>very low</i><br>Study limitations (-1)<br>Imprecise estimate (-2)<br>Indirectness (-1) | -0.47<br>(-4.82, 3.88) | ⊕○○○ <i>very low</i> |
| CYCAZA vs Pomalidomide           | - | - | -1.47<br>(-5.87, 2.93) | ⊕○○○ <i>very low</i><br>Study limitations (-1)<br>Imprecise estimate (-2)                      | -1.47<br>(-5.87, 2.93) | ⊕○○○ <i>very low</i> |
| Nintedanib vs Pirfenidone        |   |   | -1.44<br>(-4.52, 1.65) | ⊕⊕○○ <i>low</i><br>Imprecise estimate (-2)                                                     | -1.44<br>(-4.52, 1.65) | ⊕⊕○○ <i>low</i>      |
| Nintedanib vs Pomalidomide       | - | - | -2.44<br>(-5.60, 0.72) | ⊕⊕○○ <i>low</i><br>Study limitations (-1)<br>Imprecise estimate (-2)                           | -2.44<br>(-5.60, 0.72) | ⊕○○○ <i>very low</i> |
| Pirfenidone vs Pomalidomide      | - | - | -1.00<br>(-5.36, 3.36) | ⊕○○○ <i>very low</i><br>Study limitations (-1)<br>Imprecise estimate (-2)<br>Indirectness (-1) | -1.00<br>(-5.36, 3.36) | ⊕○○○ <i>very low</i> |

## 7.5 GRADE "Deaths"

| Comparison                        | Direct evidence        |                                                                                                | Indirect evidence      |                                                                                                | NMA                    |                      |
|-----------------------------------|------------------------|------------------------------------------------------------------------------------------------|------------------------|------------------------------------------------------------------------------------------------|------------------------|----------------------|
|                                   | logOR<br>(95%CI)       | Quality of evidence<br>Reason for downgrading                                                  | logOR<br>(95%CI)       | Quality of evidence<br>Reason for downgrading                                                  | logOR<br>(95%CI)       | Quality of evidence  |
| Cyclophosphamide vs Placebo       | -0.02<br>(-1.20, 1.17) | ⊕⊕OO <i>low</i><br>Imprecise estimate (-2)                                                     | Not estimable          | Not estimable                                                                                  | -0.02<br>(-1.20, 1.17) | ⊕⊕OO <i>low</i>      |
| Mycophenolate vs Placebo          | -                      | -                                                                                              | -0.99<br>(-2.63, 0.65) | ⊕⊕OO <i>low</i><br>Imprecise estimate (-2)                                                     | -0.99<br>(-2.63, 0.65) | ⊕⊕OO <i>low</i>      |
| CYCPRD vs Placebo                 | -                      | -                                                                                              | -0.02<br>(-3.18, 3.15) | ⊕⊕OO <i>low</i><br>Study limitations (-1)<br>Imprecise estimate (-2)                           | -0.02<br>(-3.18, 3.15) | ⊕⊕OO <i>low</i>      |
| Rituximab vs Placebo              | -                      | -                                                                                              | -0.02<br>(-3.07, 3.04) | ⊕OOO <i>very low</i><br>Study limitations (-1)<br>Imprecise estimate (-2)<br>Indirectness (-1) | -0.02<br>(-3.07, 3.04) | ⊕OOO <i>very low</i> |
| Nintedanib vs Placebo             | 0.11<br>(-0.80, 1.03)  | ⊕⊕OO <i>low</i><br>Imprecise estimate (-2)                                                     | Not estimable          | Not estimable                                                                                  | 0.11<br>(-0.80, 1.03)  | ⊕⊕OO <i>low</i>      |
| Pirfenidone vs Placebo            | 0.00<br>(-3.98, 3.98)  | ⊕OOO <i>very low</i><br>Imprecise estimate (-2)<br>Indirectness (-1)                           | Not estimable          | Not estimable                                                                                  | 0.00<br>(-3.98, 3.98)  | ⊕OOO <i>very low</i> |
| Pomalidomide vs Placebo           | 0.30<br>(-3.72, 4.32)  | ⊕OOO <i>very low</i><br>Study limitations (-1)<br>Imprecise estimate (-2)                      | Not estimable          | Not estimable                                                                                  | 0.30<br>(-3.72, 4.32)  | ⊕OOO <i>very low</i> |
| Cyclophosphamide vs Mycophenolate | 0.97<br>(-0.17, 2.11)  | ⊕⊕OO <i>low</i><br>Imprecise estimate (-2)                                                     | Not estimable          | Not estimable                                                                                  | 0.97<br>(-0.17, 2.11)  | ⊕⊕OO <i>low</i>      |
| Cyclophosphamide vs CYCPRD        | -0.00<br>(-2.94, 2.94) | ⊕OOO <i>very low</i><br>Study limitations (-1)<br>Imprecise estimate (-2)                      | Not estimable          | Not estimable                                                                                  | -0.00<br>(-2.94, 2.94) | ⊕OOO <i>very low</i> |
| Cyclophosphamide vs Rituximab     | 0.00<br>(-2.82, 2.82)  | ⊕OOO <i>very low</i><br>Study limitations (-1)<br>Imprecise estimate (-2)<br>Indirectness (-1) | Not estimable          | Not estimable                                                                                  | 0.00<br>(-2.82, 2.82)  | ⊕OOO <i>very low</i> |
| Cyclophosphamide vs Nintedanib    | -                      | -                                                                                              | -0.13<br>(-1.62, 1.37) | ⊕⊕OO <i>low</i><br>Imprecise estimate (-2)                                                     | -0.13<br>(-1.62, 1.37) | ⊕⊕OO <i>low</i>      |
| Cyclophosphamide vs Pirfenidone   | -                      | -                                                                                              | -0.02<br>(-4.16, 4.13) | ⊕⊕OO <i>low</i><br>Imprecise estimate (-2)                                                     | -0.02<br>(-4.16, 4.13) | ⊕⊕OO <i>low</i>      |
| Cyclophosphamide vs Pomalidomide  | -                      | -                                                                                              | -0.32                  | ⊕OOO <i>very low</i>                                                                           | -0.32                  | ⊕OOO <i>very low</i> |

|                               |   |   |                        |                                                                                                |                        |                      |
|-------------------------------|---|---|------------------------|------------------------------------------------------------------------------------------------|------------------------|----------------------|
|                               |   |   | (-4.51, 3.87)          | Study limitations (-1)<br>Imprecise estimate (-2)                                              | (-4.51, 3.87)          |                      |
| Mycophenolate vs CYCPRED      | - | - | -0.97<br>(-4.12, 2.18) | ⊕○○○ <i>very low</i><br>Study limitations (-1)<br>Imprecise estimate (-2)                      | -0.97<br>(-4.12, 2.18) | ⊕○○○ <i>very low</i> |
| Mycophenolate vs Rituximab    | - | - | -0.97<br>(-4.01, 2.07) | ⊕○○○ <i>very low</i><br>Study limitations (-1)<br>Imprecise estimate (-2)<br>Indirectness (-1) | -0.97<br>(-4.01, 2.07) | ⊕○○○ <i>very low</i> |
| Mycophenolate vs Nintedanib   | - | - | -1.10<br>(-2.98, 0.78) | ⊕⊕○○ <i>low</i><br>Imprecise estimate (-2)                                                     | -1.10<br>(-2.98, 0.78) | ⊕⊕○○ <i>low</i>      |
| Mycophenolate vs Pirfenidone  | - | - | -0.99<br>(-5.29, 3.31) | ⊕○○○ <i>very low</i><br>Imprecise estimate (-2)<br>Indirectness (-1)                           | -0.99<br>(-5.29, 3.31) | ⊕○○○ <i>very low</i> |
| Mycophenolate vs Pomalidomide | - | - | -1.29<br>(-5.63, 3.05) | ⊕○○○ <i>very low</i><br>Study limitations (-1)<br>Imprecise estimate (-2)<br>Indirectness (-1) | -1.29<br>(-5.63, 3.05) | ⊕○○○ <i>very low</i> |
| CYCPRED vs Rituximab          | - | - | 0.00<br>(-4.07, 4.07)  | ⊕○○○ <i>very low</i><br>Study limitations (-1)<br>Imprecise estimate (-2)<br>Indirectness (-1) | 0.00<br>(-4.07, 4.07)  | ⊕○○○ <i>very low</i> |
| CYCPRED vs Nintedanib         | - | - | -0.13<br>(-3.43, 3.17) | ⊕○○○ <i>very low</i><br>Study limitations (-1)<br>Imprecise estimate (-2)                      | -0.13<br>(-3.43, 3.17) | ⊕○○○ <i>very low</i> |
| CYCPRED vs Pirfenidone        | - | - | -0.02<br>(-5.10, 5.07) | ⊕○○○ <i>very low</i><br>Study limitations (-1)<br>Imprecise estimate (-2)<br>Indirectness (-1) | -0.02<br>(-5.10, 5.07) | ⊕○○○ <i>very low</i> |
| CYCPRED vs Pomalidomide       | - | - | -0.32<br>(-5.44, 4.80) | ⊕○○○ <i>very low</i><br>Study limitations (-1)<br>Imprecise estimate (-2)                      | -0.32<br>(-5.44, 4.80) | ⊕○○○ <i>very low</i> |
| Rituximab vs Nintedanib       | - | - | -0.13<br>(-3.32, 3.06) | ⊕○○○ <i>very low</i><br>Study limitations (-1)<br>Imprecise estimate (-2)<br>Indirectness (-1) | -0.13<br>(-3.32, 3.06) | ⊕○○○ <i>very low</i> |
| Rituximab vs Pirfenidone      | - | - | -0.02<br>(-5.03, 5.00) | ⊕○○○ <i>very low</i><br>Study limitations (-1)<br>Imprecise estimate (-2)                      | -0.02<br>(-5.03, 5.00) | ⊕○○○ <i>very low</i> |

|                             |   |   |                        |                                                                                                |                        |                      |
|-----------------------------|---|---|------------------------|------------------------------------------------------------------------------------------------|------------------------|----------------------|
|                             |   |   |                        | Indirectness (-1)                                                                              |                        |                      |
| Rituximab vs Pomalidomide   | - | - | -0.02<br>(-5.03, 5.00) | ⊕○○○ <i>very low</i><br>Study limitations (-1)<br>Imprecise estimate (-2)<br>Indirectness (-1) | -0.02<br>(-5.03, 5.00) | ⊕○○○ <i>very low</i> |
| Nintedanib vs Pirfenidone   | - | - | 0.11<br>(-3.97, 4.19)  | ⊕○○○ <i>very low</i><br>Imprecise estimate (-2)<br>Indirectness (-1)                           | 0.11<br>(-3.97, 4.19)  | ⊕○○○ <i>very low</i> |
| Nintedanib vs Pomalidomide  | - | - | -0.19<br>(-4.31, 3.93) | ⊕○○○ <i>very low</i><br>Study limitations (-1)<br>Imprecise estimate (-2)                      | -0.19<br>(-4.31, 3.93) | ⊕○○○ <i>very low</i> |
| Pirfenidone vs Pomalidomide | - | - | -0.30<br>(-5.96, 5.35) | ⊕○○○ <i>very low</i><br>Study limitations (-1)<br>Imprecise estimate (-2)<br>Indirectness (-1) | -0.30<br>(-5.96, 5.35) | ⊕○○○ <i>very low</i> |

## 8. SUCRA and cumulative probability plots

### 8.1 SUCRA "change in FVC % of predicted"

Treatment Relative Ranking of Estimated probabilities

| Treatment        | SUCRA | PrBest | MeanRank |
|------------------|-------|--------|----------|
| Placebo          | 37.6  | 00.0   | 05.4     |
| Cyclophosphamide | 47.7  | 00.0   | 04.7     |
| Mycophenolate    | 13.8  | 00.0   | 07.0     |
| CYCPRED          | 55.1  | 06.2   | 04.1     |
| CYCAZA           | 74.8  | 12.3   | 02.8     |
| Rituximab        | 95.7  | 76.4   | 01.3     |
| Pirfenidone      | 62.8  | 04.9   | 03.6     |
| Pomalidomide     | 12.5  | 00.3   | 07.1     |

Treatment Relative Ranking of Predictive probabilities

| Treatment        | SUCRA | PrBest | MeanRank |
|------------------|-------|--------|----------|
| Placebo          | 37.8  | 00.0   | 05.4     |
| Cyclophosphamide | 47.5  | 00.0   | 04.7     |
| Mycophenolate    | 13.9  | 00.0   | 07.0     |
| CYCPRED          | 55.0  | 06.2   | 04.2     |
| CYCAZA           | 74.7  | 12.1   | 02.8     |
| Rituximab        | 95.7  | 76.7   | 01.3     |
| Pirfenidone      | 62.8  | 04.9   | 03.6     |
| Pomalidomide     | 12.5  | 00.2   | 07.1     |

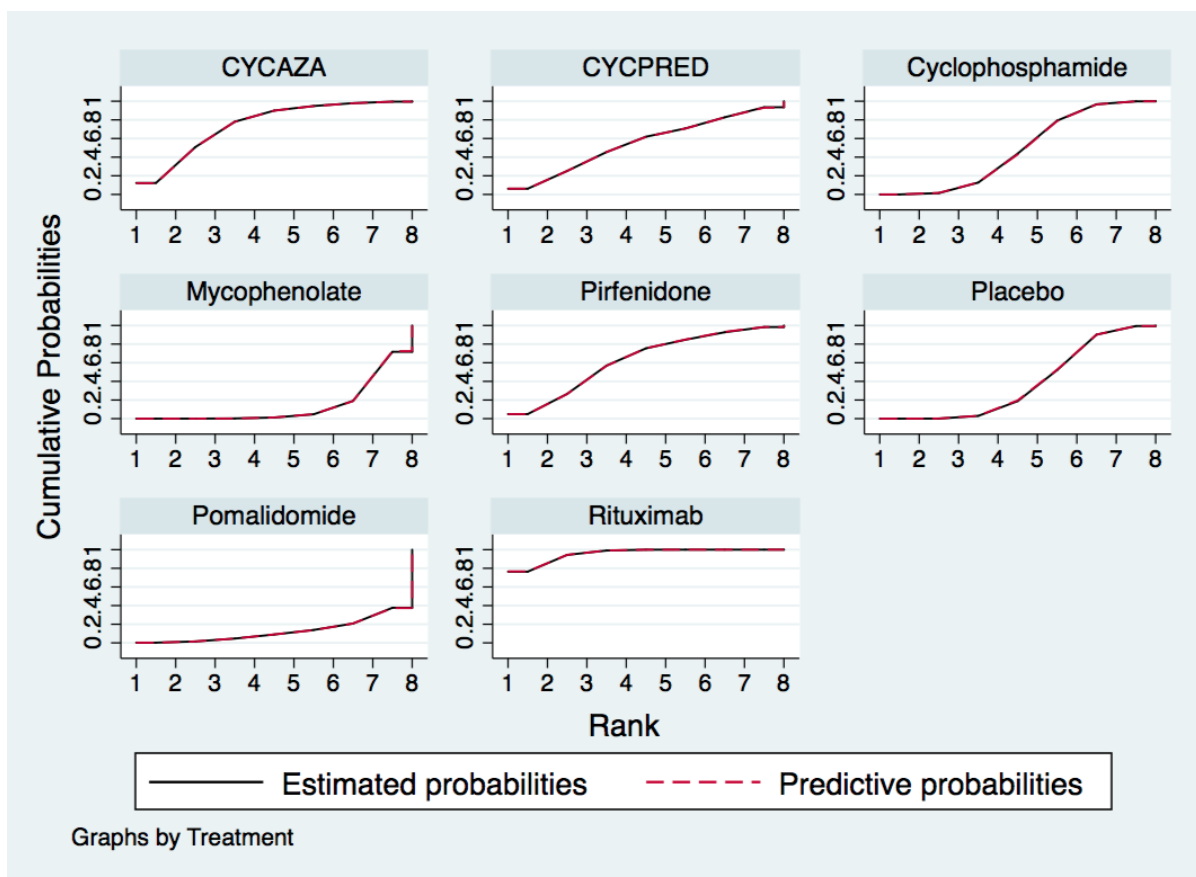

## 8.2 SUCRA “change in DLCO % of predicted”

Treatment Relative Ranking of Estimated probabilities

| Treatment        | SUCRA | PrBest | MeanRank |
|------------------|-------|--------|----------|
| Placebo          | 45.5  | 01.0   | 03.7     |
| Cyclophosphamide | 25.9  | 00.2   | 04.7     |
| Mycophenolate    | 65.3  | 08.6   | 02.7     |
| CYCPRED          | 89.8  | 82.6   | 01.5     |
| CYCAZA           | 41.7  | 06.8   | 03.9     |
| Nintedanib       | 31.9  | 00.8   | 04.4     |

Treatment Relative Ranking of Predictive probabilities

| Treatment        | SUCRA | PrBest | MeanRank |
|------------------|-------|--------|----------|
| Placebo          | 45.4  | 01.1   | 03.7     |
| Cyclophosphamide | 26.2  | 00.1   | 04.7     |
| Mycophenolate    | 65.3  | 08.5   | 02.7     |
| CYCPRED          | 90.2  | 83.0   | 01.5     |
| CYCAZA           | 41.5  | 06.6   | 03.9     |
| Nintedanib       | 31.4  | 00.7   | 04.4     |

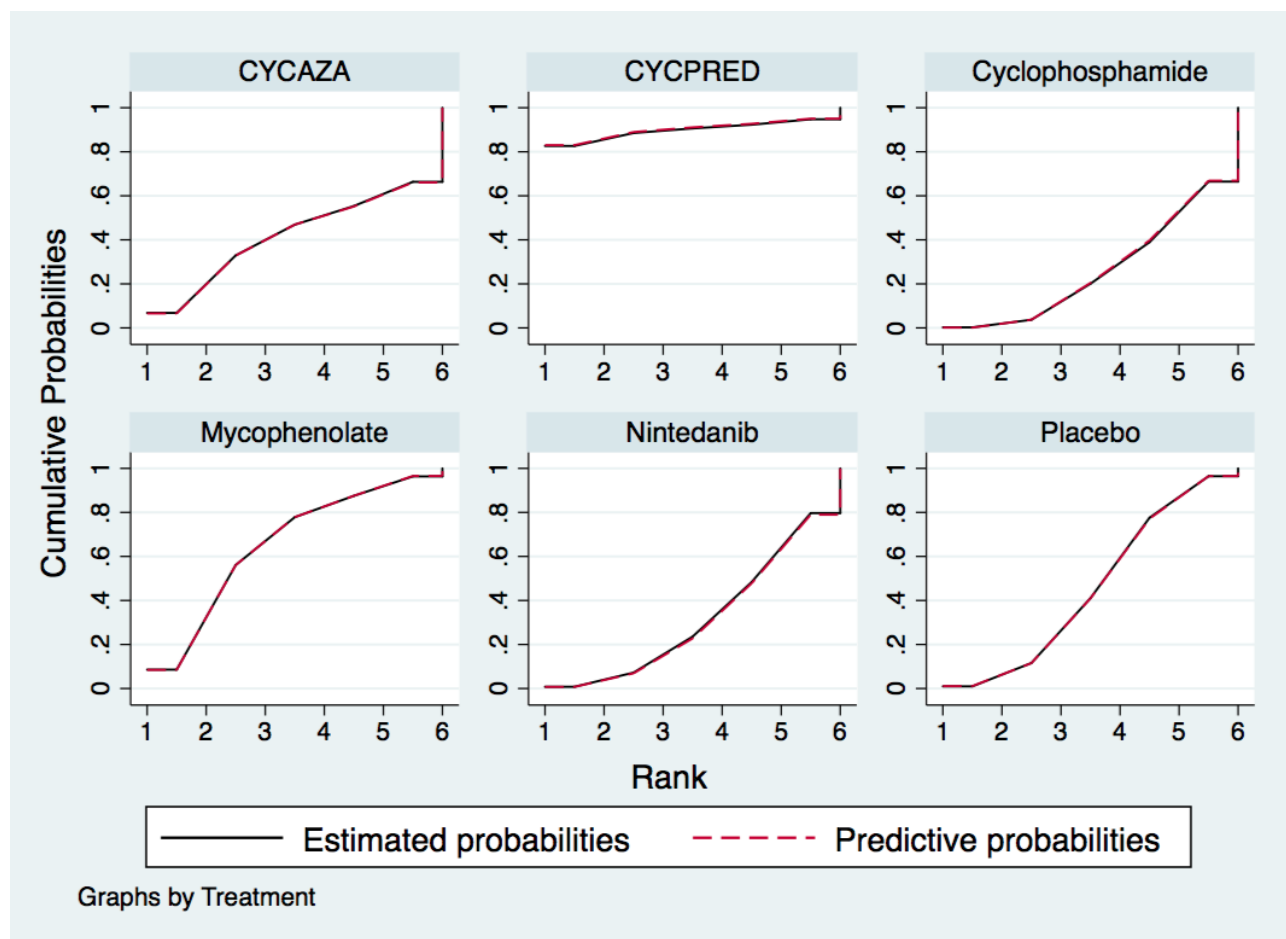

### 8.3 SUCRA “number of patients with SAEs”

| Treatment        | SUCRA | PrBest | MeanRank |
|------------------|-------|--------|----------|
| Placebo          | 85.7  | 56.5   | 01.6     |
| Cyclophosphamide | 57.5  | 15.4   | 02.7     |
| Mycophenolate    | 33.2  | 05.9   | 03.7     |
| Nintedanib       | 67.0  | 19.3   | 02.3     |
| Pomalidomide     | 06.5  | 03.0   | 04.7     |

Treatment Relative Ranking of Predictive probabilities

| Treatment        | SUCRA | PrBest | MeanRank |
|------------------|-------|--------|----------|
| Placebo          | 86.1  | 57.7   | 01.6     |
| Cyclophosphamide | 57.3  | 14.7   | 02.7     |
| Mycophenolate    | 33.0  | 05.7   | 03.7     |
| Nintedanib       | 66.9  | 18.7   | 02.3     |
| Pomalidomide     | 06.6  | 03.2   | 04.7     |

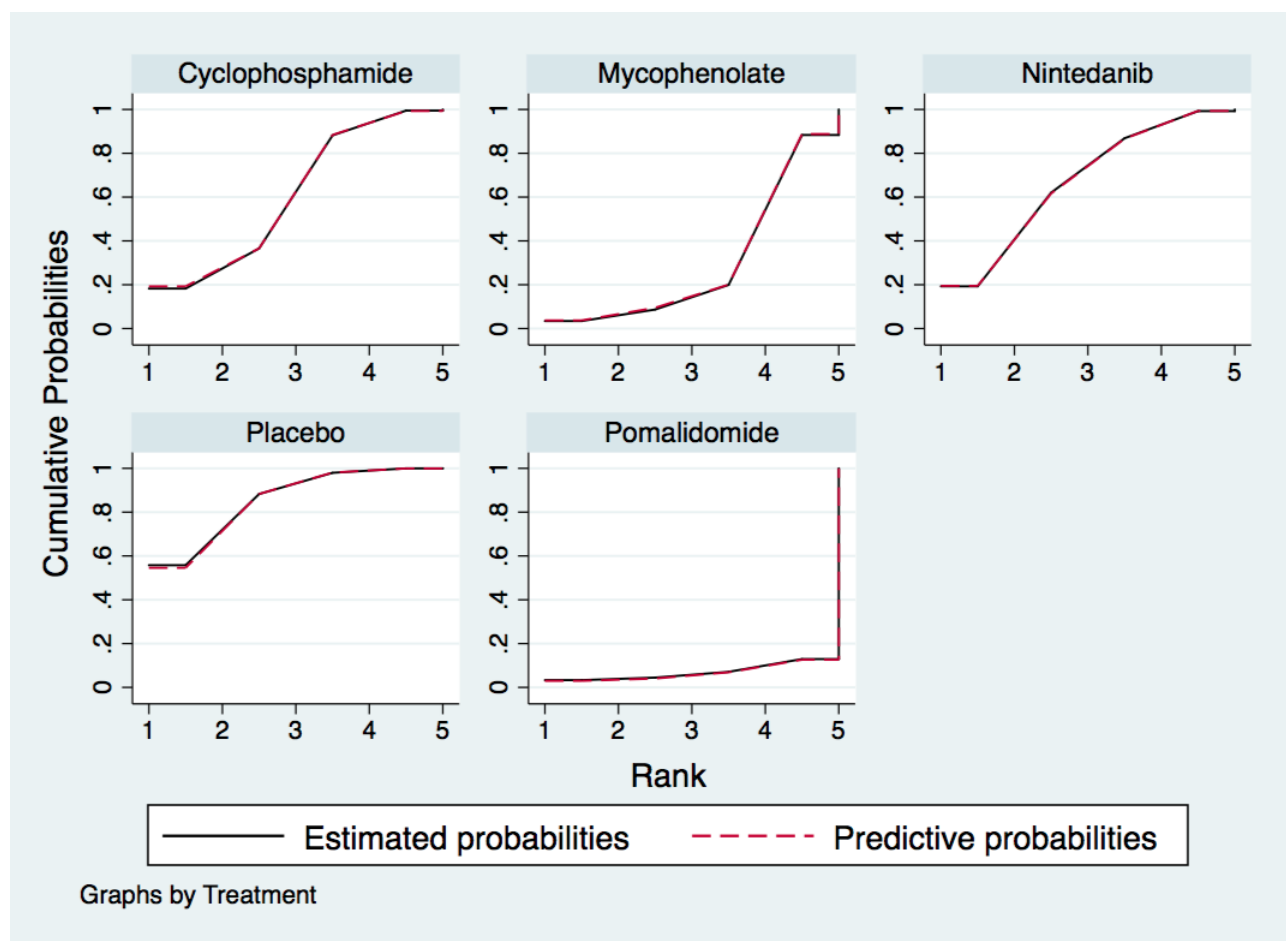

#### 8.4 SUCRA “number of patients discontinuing treatment for AEs”

Treatment Relative Ranking of Estimated probabilities

| Treatment        | SUCRA | PrBest | MeanRank |
|------------------|-------|--------|----------|
| Placebo          | 94.2  | 70.7   | 01.3     |
| Cyclophosphamide | 17.8  | 00.1   | 05.9     |
| Mycophenolate    | 44.0  | 05.3   | 04.4     |
| CYCAZA           | 53.0  | 13.8   | 03.8     |
| Nintedanib       | 71.5  | 00.2   | 02.7     |
| Pirfenidone      | 43.4  | 08.0   | 04.4     |
| Pomalidomide     | 26.1  | 01.9   | 05.4     |

Treatment Relative Ranking of Predictive probabilities

| Treatment        | SUCRA | PrBest | MeanRank |
|------------------|-------|--------|----------|
| Placebo          | 94.3  | 71.1   | 01.3     |
| Cyclophosphamide | 17.8  | 00.2   | 05.9     |
| Mycophenolate    | 44.1  | 05.2   | 04.4     |
| CYCAZA           | 52.3  | 13.6   | 03.9     |
| Nintedanib       | 71.5  | 00.3   | 02.7     |
| Pirfenidone      | 43.8  | 07.6   | 04.4     |
| Pomalidomide     | 26.2  | 02.0   | 05.4     |

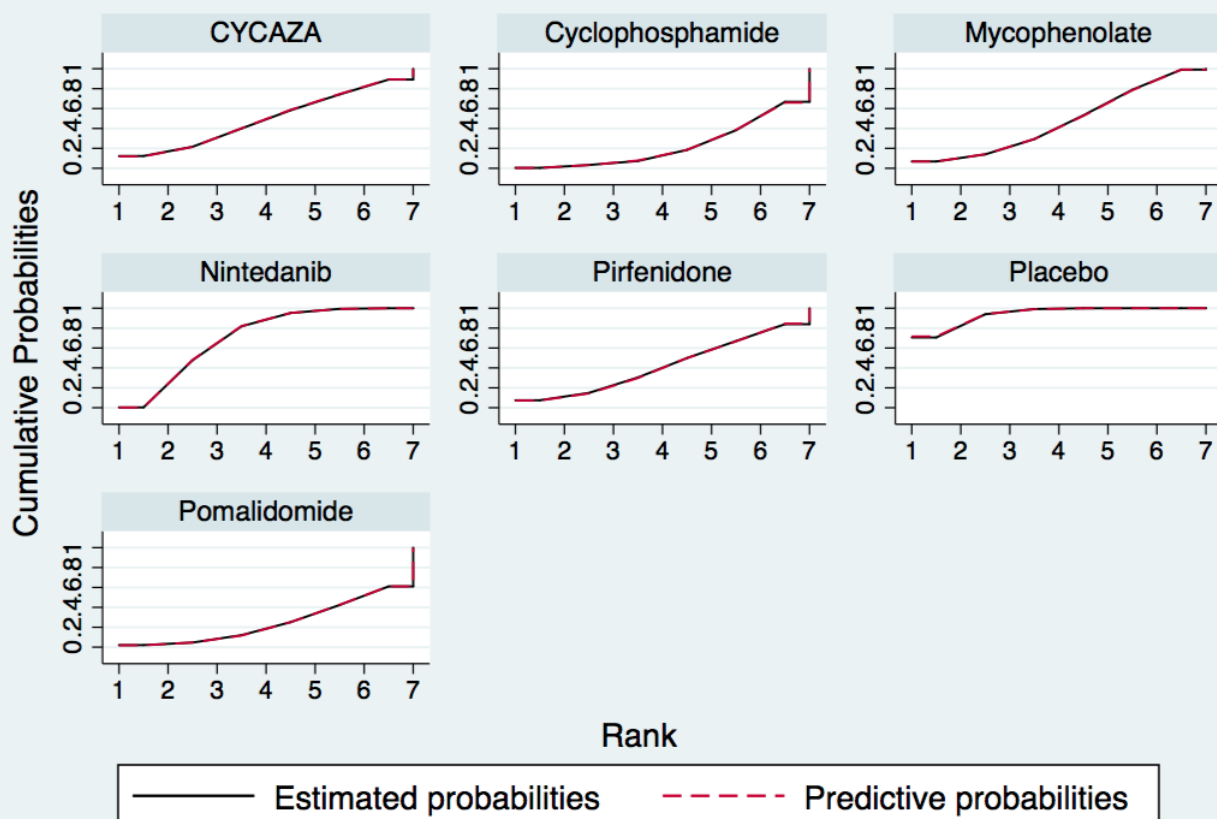

Graphs by Treatment

## 8.5 SUCRA "Deaths"

Treatment Relative Ranking of Estimated probabilities

| Treatment        | SUCRA | PrBest | MeanRank |
|------------------|-------|--------|----------|
| Placebo          | 46.4  | 00.9   | 04.8     |
| Cyclophosphamide | 45.4  | 00.2   | 04.8     |
| Mycophenolate    | 79.5  | 28.3   | 02.4     |
| CYCPRED          | 48.1  | 14.7   | 04.6     |
| Rituximab        | 47.7  | 14.3   | 04.7     |
| Nintedanib       | 41.9  | 02.0   | 05.1     |
| Pirfenidone      | 48.5  | 22.3   | 04.6     |
| Pomalidomide     | 42.7  | 17.5   | 05.0     |

Treatment Relative Ranking of Predictive probabilities

| Treatment        | SUCRA | PrBest | MeanRank |
|------------------|-------|--------|----------|
| Placebo          | 46.0  | 00.8   | 04.8     |
| Cyclophosphamide | 45.7  | 00.2   | 04.8     |
| Mycophenolate    | 79.7  | 28.3   | 02.4     |
| CYCPRED          | 48.3  | 15.8   | 04.6     |
| Rituximab        | 48.1  | 14.2   | 04.6     |
| Nintedanib       | 41.1  | 01.7   | 05.1     |
| Pirfenidone      | 48.5  | 21.8   | 04.6     |
| Pomalidomide     | 42.6  | 17.3   | 05.0     |

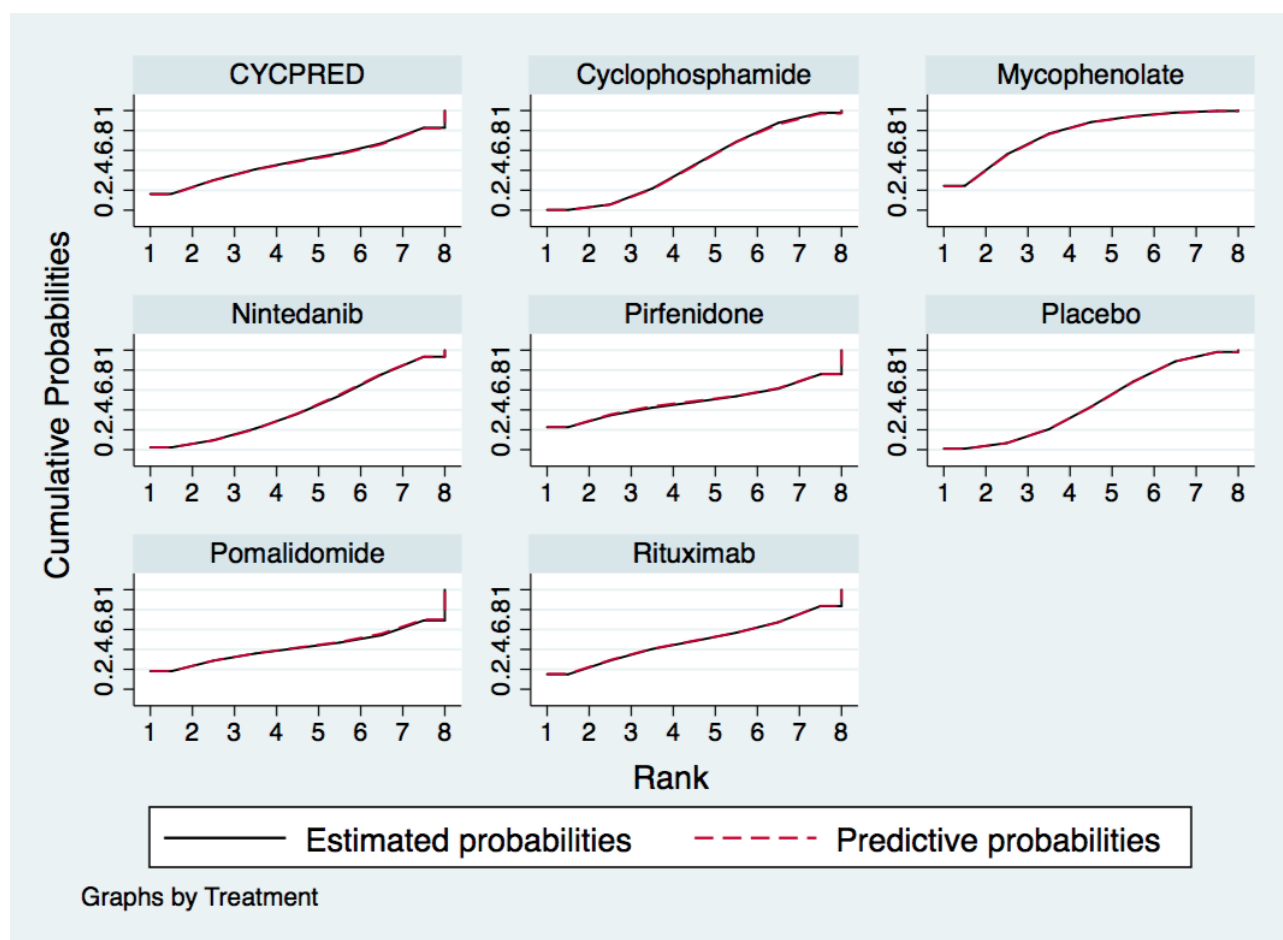

## 9. Sensitivity analysis

### 9.1 Effect estimates according to correlation factor

#### 9.1.1 FVC % of predicted

|                  | SMD (95% CI)<br>Corr 0.8 | SMD (95% CI)<br>Corr 0.7 | SMD (95% CI)<br>Corr 0.5 |
|------------------|--------------------------|--------------------------|--------------------------|
| Pomalidomide     | -0.50(-1.43, 0.43)       | -0.50(-1.43, 0.43)       | -0.50(-1.43, 0.43)       |
| Mycophenolate    | -0.29(-0.69, 0.10)       | -0.27(-0.66, 0.12)       | -0.25(-0.54, 0.14)       |
| Cyclophosphamide | 0.08(-0.22, 0.38)        | 0.08(-0.22, 0.38)        | 0.07(-0.23, 0.37)        |
| CYCPRED          | 0.23(-0.74, 1.20)        | 0.20(-0.76, 1.17)        | 0.16(-0.81, 1.14)        |
| Pirfenidone      | 0.32(-0.36, 1.00)        | 0.33(-0.36, 1.00)        | 0.33(-0.32, 0.98)        |
| CYCAZA           | 0.51(-0.14, 1.17)        | 0.42(-0.23, 1.07)        | 0.32(-0.36, 1.00)        |
| Rituximab        | 1.00(0.39, 1.61)         | 0.83 (0.23, 1.44)        | 0.66(0.07, 1.26)         |

#### 9.1.2 DLCO % of predicted

|                  | SMD (95% CI)<br>Corr 0.8 | SMD (95% CI)<br>Corr 0.7 | SMD (95% CI)<br>Corr 0.5 |
|------------------|--------------------------|--------------------------|--------------------------|
| Cyclophosphamide | -0.08(-0.38, 0.21)       | -0.08(-0.38, 0.23)       | -0.07(-0.37, 0.23)       |
| Nintedanib       | -0.05(-0.21, -0.12)      | -0.05(-0.21, 0.12)       | -0.05(-0.21, 0.12)       |
| CYCAZA           | -0.01(-0.66, 0.63)       | -0.01(-0.65, 0.63)       | -0.01(-0.65, 0.64)       |
| Mycophenolate    | 0.14(-0.25, 0.53)        | 0.12(-0.27, 0.50)        | 0.09(-0.30, 0.48)        |
| CYCPRED          | 0.90(-0.44, 2.24)        | 0.75(-0.5, 2.06)         | 0.58(-0.69, 1.86)        |

### 9.2 Effect estimates according to the length of follow-up

#### 9.2.1 FVC % of predicted

|                  | SMD (95% CI)<br>All studies | SMD (95% CI)<br>Studies with 12-months<br>of follow-up |
|------------------|-----------------------------|--------------------------------------------------------|
| Pomalidomide     | -0.50(-1.43, 0.43)          | -0.50(-1.43, 0.43)                                     |
| Mycophenolate    | -0.29(-0.69, 0.10)          | 0.00(-0.50, 0.49)                                      |
| Cyclophosphamide | 0.08(-0.22, 0.38)           | 0.21(-0.12, 0.53)                                      |
| CYCPRED          | 0.23(-0.74, 1.20)           | 0.35(-0.63, 1.34)                                      |
| Pirfenidone      | 0.32(-0.36, 1.00)           | -                                                      |
| CYCAZA           | 0.51(-0.14, 1.17)           | 0.51(-0.14, 1.17)                                      |
| Rituximab        | 1.00(0.39, 1.61)            | -                                                      |

#### 9.2.2 DLCO % of predicted

|                  | SMD (95% CI)<br>All studies | SMD (95% CI)<br>Studies with 12-months<br>of follow-up |
|------------------|-----------------------------|--------------------------------------------------------|
| Cyclophosphamide | -0.08(-0.38, 0.21)          | -0.08(-0.40, 0.25)                                     |
| Nintedanib       | -0.05(-0.21, -0.12)         | -0.05(-0.21, 0.12)                                     |
| CYCAZA           | -0.01(-0.66, 0.63)          | -0.01(-0.65, 0.63)                                     |
| Mycophenolate    | 0.14(-0.25, 0.53)           | 0.16(-0.34, 0.66)                                      |
| CYCPRED          | 0.90(-0.44, 2.24)           | 0.91(-0.44, 2.25)                                      |

## 10. Dataset

Paste on a Stata.dta the following dataset

| study | study id           | outcome     | months | trt | Arm     | n   | mean   | sd   | events | rob |
|-------|--------------------|-------------|--------|-----|---------|-----|--------|------|--------|-----|
| 1     | SLS-I, 2006        | FVC         | 12     | 1   | PBO     | 72  | -2.60  | 7.6  |        | 1   |
| 1     | SLS-I, 2006        | FVC         | 12     | 2   | CYC     | 73  | -1.00  | 7.8  |        | 1   |
| 1     | SLS-I, 2006        | DLCO        | 12     | 1   | PBO     | 72  | -3.50  | 8.4  |        | 1   |
| 1     | SLS-I, 2006        | DLCO        | 12     | 2   | CYC     | 73  | -4.20  | 9.9  |        | 1   |
| 1     | SLS-I, 2006        | SAE         | 12     | 1   | PBO     | 76  |        |      | 16     | 1   |
| 1     | SLS-I, 2006        | SAE         | 12     | 2   | CYC     | 79  |        |      | 20     | 1   |
| 1     | SLS-I, 2006        | Deaths      | 12     | 1   | PBO     | 76  |        |      | 6      | 1   |
| 1     | SLS-I, 2006        | Deaths      | 12     | 2   | CYC     | 79  |        |      | 6      | 1   |
| 2     | SLS-II, 2016       | FVC         | 12     | 2   | CYC     | 51  | 3.36   | 6.6  |        | 1   |
| 2     | SLS-II, 2016       | FVC         | 12     | 3   | MMF     | 59  | 1.93   | 6.9  |        | 1   |
| 2     | SLS-II, 2016       | DLCO        | 12     | 2   | CYC     | 51  | -7.88  | 10.3 |        | 1   |
| 2     | SLS-II, 2016       | DLCO        | 12     | 3   | MMF     | 58  | -5.58  | 9.3  |        | 1   |
| 2     | SLS-II, 2016       | SAE         | 12     | 2   | CYC     | 73  |        |      | 22     | 1   |
| 2     | SLS-II, 2016       | SAE         | 12     | 3   | MMF     | 69  |        |      | 27     | 1   |
| 2     | SLS-II, 2016       | Withdrawals | 12     | 2   | CYC     | 73  |        |      | 15     | 1   |
| 2     | SLS-II, 2016       | Withdrawals | 12     | 3   | MMF     | 69  |        |      | 7      | 1   |
| 2     | SLS-II, 2016       | Deaths      | 12     | 2   | CYC     | 73  |        |      | 11     | 1   |
| 2     | SLS-II, 2016       | Deaths      | 12     | 3   | MMF     | 69  |        |      | 5      | 1   |
| 3     | Domiciano DS, 2011 | FVC         | 12     | 2   | CYC     | 9   | -2.11  | 10.7 |        | 3   |
| 3     | Domiciano DS, 2011 | FVC         | 12     | 4   | CYCPRED | 9   | -0.77  | 5.8  |        | 3   |
| 3     | Domiciano DS, 2011 | DLCO        | 12     | 2   | CYC     | 5   | -14.60 | 9.1  |        | 3   |
| 3     | Domiciano DS, 2011 | DLCO        | 12     | 4   | CYCPRED | 6   | -4.00  | 10.2 |        | 3   |
| 3     | Domiciano DS, 2011 | Deaths      | 12     | 2   | CYC     | 9   |        |      | 1      | 3   |
| 3     | Domiciano DS, 2011 | Deaths      | 12     | 4   | CYCPRED | 9   |        |      | 1      | 3   |
| 4     | Hoyles RK, 2006    | FVC         | 12     | 1   | PBO     | 18  | -3.00  | 13.0 |        | 3   |
| 4     | Hoyles RK, 2006    | FVC         | 12     | 5   | CYCAZA  | 19  | 2.40   | 6.8  |        | 3   |
| 4     | Hoyles RK, 2006    | DLCO        | 12     | 1   | PBO     | 18  | -3.20  | 8.9  |        | 3   |
| 4     | Hoyles RK, 2006    | DLCO        | 12     | 5   | CYCAZA  | 19  | -3.30  | 7.0  |        | 3   |
| 4     | Hoyles RK, 2006    | Withdrawals | 12     | 1   | PBO     | 23  |        |      | 0      | 3   |
| 4     | Hoyles RK, 2006    | Withdrawals | 12     | 5   | CYCAZA  | 22  |        |      | 2      | 3   |
| 5     | Naidu GSRSNK, 2020 | FVC         | 6      | 1   | PBO     | 21  | 1.28   | 4.2  |        | 3   |
| 5     | Naidu GSRSNK, 2020 | FVC         | 6      | 3   | MMF     | 20  | -3.68  | 8.0  |        | 3   |
| 5     | Naidu GSRSNK, 2020 | DLCO        | 6      | 1   | PBO     | 21  | 1.50   | 10.8 |        | 3   |
| 5     | Naidu GSRSNK, 2020 | DLCO        | 6      | 3   | MMF     | 20  | 2.93   | 14.7 |        | 3   |
| 5     | Naidu GSRSNK, 2020 | SAE         | 6      | 1   | PBO     | 21  |        |      | 0      | 3   |
| 5     | Naidu GSRSNK, 2020 | SAE         | 6      | 3   | MMF     | 20  |        |      | 1      | 3   |
| 5     | Naidu GSRSNK, 2020 | Withdrawals | 6      | 1   | PBO     | 21  |        |      | 0      | 3   |
| 5     | Naidu GSRSNK, 2020 | Withdrawals | 6      | 3   | MMF     | 20  |        |      | 3      | 3   |
| 6     | Sircar G, 2018     | FVC         | 6      | 2   | CYC     | 30  | -1.19  | 7.8  |        | 3   |
| 6     | Sircar G, 2018     | FVC         | 6      | 6   | RTX     | 30  | 6.22   | 8.1  |        | 3   |
| 6     | Sircar G, 2018     | Deaths      | 6      | 2   | CYC     | 30  |        |      | 1      | 3   |
| 6     | Sircar G, 2018     | Deaths      | 6      | 6   | RTX     | 30  |        |      | 1      | 3   |
| 7     | SENSCIS, 2019      | DLCO        | 12     | 1   | PBO     | 288 | -2.77  | 9.1  |        | 1   |
| 7     | SENSCIS, 2019      | DLCO        | 12     | 7   | NTD     | 287 | -3.21  | 9.1  |        | 1   |
| 7     | SENSCIS, 2019      | SAE         | 12     | 1   | PBO     | 288 |        |      | 62     | 1   |
| 7     | SENSCIS, 2019      | SAE         | 12     | 7   | NTD     | 287 |        |      | 69     | 1   |
| 7     | SENSCIS, 2019      | Withdrawals | 12     | 1   | PBO     | 288 |        |      | 25     | 1   |
| 7     | SENSCIS, 2019      | Withdrawals | 12     | 7   | NTD     | 287 |        |      | 46     | 1   |
| 7     | SENSCIS, 2019      | Deaths      | 12     | 1   | PBO     | 288 |        |      | 9      | 1   |
| 7     | SENSCIS, 2019      | Deaths      | 12     | 7   | NTD     | 287 |        |      | 10     | 1   |
| 8     | Acharya N, 2019    | FVC         | 6      | 1   | PBO     | 17  | -4.25  | 14.8 |        | 1   |
| 8     | Acharya N, 2019    | FVC         | 6      | 8   | PFD     | 17  | -0.69  | 4.4  |        | 1   |
| 8     | Acharya N, 2019    | Withdrawals | 6      | 1   | PBO     | 17  |        |      | 0      | 1   |
| 8     | Acharya N, 2019    | Withdrawals | 6      | 8   | PFD     | 17  |        |      | 3      | 1   |
| 8     | Acharya N, 2019    | Deaths      | 6      | 1   | PBO     | 17  |        |      | 0      | 1   |
| 8     | Acharya N, 2019    | Deaths      | 6      | 8   | PFD     | 17  |        |      | 0      | 1   |
| 9     | Hsu VM, 2018       | FVC         | 12     | 1   | PBO     | 11  | -2.80  | 4.0  |        | 3   |

|   |              |             |    |   |      |    |       |     |   |   |
|---|--------------|-------------|----|---|------|----|-------|-----|---|---|
| 9 | Hsu VM, 2018 | FVC         | 12 | 9 | POMA | 8  | -5.20 | 5.3 |   | 3 |
| 9 | Hsu VM, 2018 | SAE         | 12 | 1 | PBO  | 11 |       |     | 1 | 3 |
| 9 | Hsu VM, 2018 | SAE         | 12 | 9 | POMA | 8  |       |     | 4 | 3 |
| 9 | Hsu VM, 2018 | Withdrawals | 12 | 1 | PBO  | 11 |       |     | 0 | 3 |
| 9 | Hsu VM, 2018 | Withdrawals | 12 | 9 | POMA | 8  |       |     | 4 | 3 |
| 9 | Hsu VM, 2018 | Deaths      | 12 | 1 | PBO  | 11 |       |     | 0 | 3 |
| 9 | Hsu VM, 2018 | Deaths      | 12 | 9 | POMA | 8  |       |     | 0 | 3 |

---

## 11. Stata syntax

Paste the following commands into a Stata.do

```
use "/Users/user/Desktop/NMA.dta", clear
* OUTCOME SELECTION "Change FVC % of predicted"
keep if outcome=="FVC"
* NETWORK SETUP
network setup mean sd n, studyvar(study) trtvar(trt) armvars(drop) numcodes ref(1) smd
list study _*
network convert pairs
network table
gen invvarES=1/(_stderr^2)
list study _*
* NETWORK MAP
networkplot _t1 _t2, nodecolor(navy) labels(Placebo Cyclophosphamide Mycophenolate CYCPRED CYCAZA Rituximab
Pirfenidone Pomalidomide) edgecolor(by rob mean)
* NETWEIGHT
netweight _y _stderr _t1 _t2, scale(0.7) asp(0.7)
* CONSISTENCY and INCONSISTENCY testing
ifplot _y _stderr _t1 _t2 study, plotopt(texts(140)) xlabel(0, 5, 10) notab tau2(loop)
network convert augment
network meta c, fixed
network meta i, fixed
network sidesplit 1 2
network sidesplit 1 3
network sidesplit 3 2
* INTERVALPLOT
network meta c, fixed
intervalplot, null(0) reference(Placebo) labels(Placebo Cyclophosphamide Mycophenolate CYCPRED CYCAZA Rituximab
Pirfenidone Pomalidomide) margin(1 20 5 5)
* SUCRA
network meta c, fixed
network rank max, zero all reps(10000) gen(prob)
sucra prob*, labels(Placebo Cyclophosphamide Mycophenolate CYCPRED CYCAZA Rituximab Pirfenidone Pomalidomide)
network rank max, zero all reps(10000) gen(pred_prob) predict
sucra prob*, labels(Placebo Cyclophosphamide Mycophenolate CYCPRED CYCAZA Rituximab Pirfenidone Pomalidomide)
compare(pred_prob*) names("Estimated probabilities" "Predictive probabilities")
* NETLEAGUE
network meta c, fixed
netleague, labels(Placebo Cyclophosphamide Mycophenolate CYCPRED CYCAZA Rituximab Pirfenidone Pomalidomide)
sort(Placebo Cyclophosphamide Mycophenolate CYCPRED CYCAZA Rituximab Pirfenidone Pomalidomide)

use "/Users/user/Desktop/NMA.dta", clear
* OUTCOME SELECTION "Change DLCO % of predicted"
keep if outcome=="DLCO"
* NETWORK SETUP
network setup mean sd n, studyvar(study) trtvar(trt) armvars(drop) numcodes ref(1) smd
network convert pairs
network table
gen invvarES=1/(_stderr^2)
list study _*
* NETWORK MAP
networkplot _t1 _t2, labels(Placebo Cyclophosphamide Mycophenolate CYCPRED CYCAZA Nintedanib) edgecolor(by rob
mean)
* NETWEIGHT
netweight _y _stderr _t1 _t2, asp(0.7)
* CONSISTENCY and INCONSISTENCY testing
ifplot _y _stderr _t1 _t2 study, plotopt(texts(140)) xlabel(0, 5, 10, 15) notab tau2(loop)
network convert augment
network meta c, fixed
network meta i, fixed
network sidesplit 1 2
network sidesplit 1 3
network sidesplit 3 2
* INTERVALPLOT
network meta c, fixed
intervalplot, null(0) reference(Placebo) labels(Placebo Cyclophosphamide Mycophenolate CYCPRED CYCAZA Nintedanib)
margin(1 20 5 5)
* SUCRA
network meta c, fixed
network rank max, zero all reps(10000) gen(prob)
sucra prob*, labels(Placebo Cyclophosphamide Mycophenolate CYCPRED CYCAZA Nintedanib)
network rank max, zero all reps(10000) gen(pred_prob) predict
sucra prob*, labels(Placebo Cyclophosphamide Mycophenolate CYCPRED CYCAZA Nintedanib) compare(pred_prob*)
names("Estimated probabilities" "Predictive probabilities")
* NETLEAGUE
network meta c, fixed
netleague, labels(Placebo Cyclophosphamide Mycophenolate CYCPRED CYCAZA Nintedanib) sort(Placebo Cyclophosphamide
Mycophenolate CYCPRED CYCAZA Nintedanib)

use "/Users/user/Desktop/NMA.dta", clear
* OUTCOME SELECTION "Number of patients with serious adverse events"
keep if outcome=="SAE"
* NETWORK SETUP
network setup events n, studyvar(study) trtvar(trt) armvars(drop) numcodes ref(1) or
network convert pairs
network table
gen invvarES=1/(_stderr^2)
```

```

list study_*
* NETWORK MAP
networkplot _t1 _t2, labels(Placebo Cyclophosphamide Mycophenolate Nintedanib Pomalidomide) edgecolor(by rob mean)
* NETWEIGHT
netweight _y _stderr _t1 _t2, asp(0.7)
* CONSISTENCY and INCONSISTENCY testing
ifplot _y _stderr _t1 _t2 study, plotopt(texts(140)) xlabel(0, 2.5, 5) notab tau2(loop)
network convert augment
network meta c, fixed
network meta i, fixed
network sidesplit all
network sidesplit 1 2
network sidesplit 1 3
network sidesplit 3 2
* INTERVALPLOT
network meta c, fixed
intervalplot, null(1) reference(Placebo) labels(Placebo Cyclophosphamide Mycophenolate Nintedanib Pomalidomide)
margin(1 20 5 5)
* SUCRA
network meta c, fixed
network rank min, zero all reps(10000) gen(prob)
sucra prob*, labels(Placebo Cyclophosphamide Mycophenolate Nintedanib Pomalidomide)
network rank min, zero all reps(10000) gen(pred_prob) predict
sucra prob*, labels(Placebo Cyclophosphamide Mycophenolate Nintedanib Pomalidomide) compare(pred_prob*)
names("Estimated probabilities" "Predictive probabilities")
* NETLEAGUE
network meta c, fixed
netleague, labels(Placebo Cyclophosphamide Mycophenolate Nintedanib Pomalidomide) sort(Placebo Cyclophosphamide
Mycophenolate Nintedanib Pomalidomide)

use "/Users/user/Desktop/NMA.dta", clear
* OUTCOME SELECTION "Number of patients with serious adverse events"
keep if outcome=="Withdrawals"
* NETWORK SETUP
network setup events n, studyvar(study) trtvar(trt) armvars(drop) numcodes ref(1) or
network convert pairs
network table
gen invvarES=1/(_stderr^2)
list study_*
* NETWORK MAP
networkplot _t1 _t2, labels(Placebo Cyclophosphamide Mycophenolate CYCAZA Nintedanib Pirfenidone Pomalidomide)
edgecolor(by rob mean)
* NETWEIGHT
netweight _y _stderr _t1 _t2, asp(0.7)
* CONSISTENCY and INCONSISTENCY testing
ifplot _y _stderr _t1 _t2 study, plotopt(texts(140)) xlabel(0, 2.5, 5) notab tau2(loop)
network convert augment
network meta c, fixed
* INTERVALPLOT
network meta c, fixed
intervalplot, null(1) reference(Placebo) labels(Placebo Cyclophosphamide Mycophenolate CYCAZA Nintedanib
Pirfenidone Pomalidomide) margin(1 20 5 5)
* SUCRA
network meta c, fixed
network rank min, zero all reps(10000) gen(prob)
sucra prob*, labels(Placebo Cyclophosphamide Mycophenolate CYCAZA Nintedanib Pirfenidone Pomalidomide)
network rank min, zero all reps(10000) gen(pred_prob) predict
sucra prob*, labels(Placebo Cyclophosphamide Mycophenolate CYCAZA Nintedanib Pirfenidone Pomalidomide)
compare(pred_prob*) names("Estimated probabilities" "Predictive probabilities")
* NETLEAGUE
network meta c, fixed
netleague, labels(Placebo Cyclophosphamide Mycophenolate CYCAZA Nintedanib Pirfenidone Pomalidomide) sort(Placebo
Cyclophosphamide Mycophenolate CYCAZA Nintedanib Pirfenidone Pomalidomide)

use "/Users/user/Desktop/NMA.dta", clear
* OUTCOME SELECTION "Number of patients with serious adverse events"
keep if outcome=="Deaths"
* NETWORK SETUP
network setup events n, studyvar(study) trtvar(trt) armvars(drop) numcodes ref(1) or
network convert pairs
network table
gen invvarES=1/(_stderr^2)
list study_*
* NETWORK MAP
networkplot _t1 _t2, labels(Placebo Cyclophosphamide Mycophenolate CYCPRED Rituximab Nintedanib Pirfenidone
Pomalidomide) edgecolor(by rob mean)
* NETWEIGHT
netweight _y _stderr _t1 _t2, asp(0.7)
* CONSISTENCY and INCONSISTENCY testing
ifplot _y _stderr _t1 _t2 study, plotopt(texts(140)) xlabel(0, 2.5, 5) notab tau2(loop)
network convert augment
network meta c, fixed
* INTERVALPLOT
network meta c, fixed
intervalplot, null(1) reference(Placebo) labels(Placebo Cyclophosphamide Mycophenolate CYCPRED Rituximab
Nintedanib Pirfenidone Pomalidomide) margin(1 20 5 5)
* SUCRA
network meta c, fixed
network rank min, zero all reps(10000) gen(prob)
sucra prob*, labels(Placebo Cyclophosphamide Mycophenolate CYCPRED Rituximab Nintedanib Pirfenidone Pomalidomide)

```

```

network rank min, zero all reps(10000) gen(pred_prob) predict
sucra prob*, labels(Placebo Cyclophosphamide Mycophenolate CYCPRED Rituximab Nintedanib Pirfenidone Pomalidomide)
compare(pred_prob*) names("Estimated probabilities" "Predictive probabilities")
graph save SUCRA_SAE, replace
* NETLEAGUE
network meta c, fixed
netleague, labels(Placebo Cyclophosphamide Mycophenolate CYCPRED Rituximab Nintedanib Pirfenidone Pomalidomide)
sort(Placebo Cyclophosphamide Mycophenolate CYCPRED Rituximab Nintedanib Pirfenidone Pomalidomide)

```

## 12. Search strategy

*EU Clinical Trials Registry EudraCT*

"systemic sclerosis" NOT "multiple sclerosis", filter: adult, trials with results

*ClinicalTrials.gov*

lung (pulmonary, Pulmo), Systemic Sclerosis (Scleroderma, Diffuse sclerosis), Sclerosis (sclerose, Sclerotic); Studies with results; Interventional Studies.

*Web of Science; All Databases (Web of Science Core Collection; Biological Abstracts; KCI, Korean Journal Database; MEDLINE®; Russian Science Citation Index; SciELO Citation Index).*

#1 TS="systemic sclerosis"

#2 TS= scleroderma

#3 TS= "SSc-ILD"

#4 #3 OR #2 OR #1

#5 TS= "tuberous sclerosis"

#6 TS= "multiple sclerosis"

#7 #6 OR #5

#8 #4 NOT #7

#9 TI= randomized

#10 TI= trial

#11 TI= blind

#12 TI= randomly

#13 TI= placebo

#14 TI= randomised

#15 TI= versus

#16 TI= rituximab

#17 TI= cyclophosphamide

#18 TI= azathioprine

#19 TI= methotrexate

#20 TI= mycophenolate

#21 TI= belimumab

#22 TI= abatacept

#23 #22 OR #21 OR #20 OR #19 OR #18 OR #17 OR #16 OR #15 OR #14 OR #13 OR #12 OR #11 OR  
#10 OR #9

#24 #8 AND #23

#25 TI= review

#26 TI= retrospective

#27 TI= design

#28 TI= protocol

#29 #28 OR #27 OR #26 OR #25

#30 #24 NOT #29

*Scopus*

(((((KEY(systemic sclerosis)) OR (KEY(scleroderma)) OR (KEY(SSc-ILD)))) AND NOT ((KEY(multiple sclerosis)) OR (KEY(tuberous sclerosis)))) AND ((KEY(pulmonary fibrosis)) OR (KEY(interstitial lung disease)) OR (KEY(pneumonia)) OR (KEY(lung)))) AND ((TITLE-ABS-KEY(randomized)) OR (TITLE-ABS-KEY(randomised)) OR (TITLE-ABS-KEY(trial)) OR (TITLE-ABS-KEY(controlled)) OR (TITLE-ABS-KEY(placebo)) OR (TITLE-ABS-KEY(versus)))) AND NOT ((TITLE-ABS-KEY(review)) OR (TITLE-ABS-KEY(open-label)) OR (TITLE-ABS-KEY(retrospective))) AND NOT INDEX(medline)
